# Supplementary material for: A 3-Dimensional Trimeric β-Barrel Model for Chlamydia MOMP Contains Conserved and Novel Elements of Gram-Negative Bacterial Porins
Source: PLoS One. 2013 Jul 25;8(7):e68934. doi: 10.1371/journal.pone.0068934 (PMC3723809; doi:10.1371/journal.pone.0068934)
Supplement: Model S1 — C_trachomatis_serovarC_MOMPmodel_final_May2013 (PDB) [file pone.0068934.s002.pdb]

REMARK 888
REMARK 888 WRITTEN BY MAESTRO (A PRODUCT OF SCHRODINGER, LLC)
REMARK 888 V. Feher et al. PLoS One 2013
REMARK 888 Low Resolution Trimer Model for MOMP
TITLE     C_trachomatis_serovarC_MOMPmodel_final_May2013
CRYST1   10.000   10.000   10.000  90.00  90.00  90.00 P1            0
MODEL        1
ATOM      1  N   LEU A   1       2.864   8.281 -10.033  1.00 30.00           N1+
ATOM      2  CA  LEU A   1       2.830   7.953 -11.487  1.00 30.00           C
ATOM      3  C   LEU A   1       1.395   7.565 -11.880  1.00 30.00           C
ATOM      4  O   LEU A   1       0.672   7.005 -11.068  1.00 30.00           O
ATOM      5  N   PRO A   2       1.000   7.936 -13.079  1.00 30.00           N
ATOM      6  CA  PRO A   2      -0.348   7.631 -13.556  1.00 30.00           C
ATOM      7  C   PRO A   2      -0.380   6.189 -13.995  1.00 30.00           C
ATOM      8  O   PRO A   2       0.312   5.920 -14.967  1.00 30.00           O
ATOM      9  N   VAL A   3      -1.027   5.277 -13.285  1.00 30.00           N
ATOM     10  CA  VAL A   3      -0.967   3.861 -13.673  1.00 30.00           C
ATOM     11  C   VAL A   3      -2.265   3.386 -14.310  1.00 30.00           C
ATOM     12  O   VAL A   3      -2.445   2.190 -14.544  1.00 30.00           O
ATOM     13  N   GLY A   4      -3.195   4.319 -14.483  1.00 30.00           N
ATOM     14  CA  GLY A   4      -4.499   3.935 -15.024  1.00 30.00           C
ATOM     15  C   GLY A   4      -5.198   5.191 -15.527  1.00 30.00           C
ATOM     16  O   GLY A   4      -5.157   6.245 -14.897  1.00 30.00           O
ATOM     17  N   ASN A   5      -5.742   5.075 -16.725  1.00 30.00           N
ATOM     18  CA  ASN A   5      -6.422   6.167 -17.394  1.00 30.00           C
ATOM     19  C   ASN A   5      -7.338   5.546 -18.447  1.00 30.00           C
ATOM     20  O   ASN A   5      -6.869   5.248 -19.540  1.00 30.00           O
ATOM     21  N   PRO A   6      -8.587   5.322 -18.097  1.00 30.00           N
ATOM     22  CA  PRO A   6      -9.517   4.699 -19.032  1.00 30.00           C
ATOM     23  C   PRO A   6     -10.946   5.026 -18.629  1.00 30.00           C
ATOM     24  O   PRO A   6     -11.246   5.139 -17.437  1.00 30.00           O
ATOM     25  N   ALA A   7     -11.810   5.211 -19.628  1.00 30.00           N
ATOM     26  CA  ALA A   7     -13.207   5.538 -19.405  1.00 30.00           C
ATOM     27  C   ALA A   7     -13.455   6.742 -18.506  1.00 30.00           C
ATOM     28  O   ALA A   7     -14.277   6.635 -17.585  1.00 30.00           O
ATOM     29  N   GLU A   8     -12.697   7.816 -18.595  1.00 30.00           N
ATOM     30  CA  GLU A   8     -12.851   8.990 -17.771  1.00 30.00           C
ATOM     31  C   GLU A   8     -12.203   8.961 -16.391  1.00 30.00           C
ATOM     32  O   GLU A   8     -12.161  10.005 -15.732  1.00 30.00           O
ATOM     33  N   PRO A   9     -11.666   7.837 -15.930  1.00 30.00           N
ATOM     34  CA  PRO A   9     -11.018   7.764 -14.639  1.00 30.00           C
ATOM     35  C   PRO A   9      -9.495   7.686 -14.761  1.00 30.00           C
ATOM     36  O   PRO A   9      -8.956   6.867 -15.506  1.00 30.00           O
ATOM     37  N   SER A  10      -8.786   8.527 -14.013  1.00 30.00           N
ATOM     38  CA  SER A  10      -7.332   8.446 -13.989  1.00 30.00           C
ATOM     39  C   SER A  10      -6.862   8.333 -12.529  1.00 30.00           C
ATOM     40  O   SER A  10      -7.272   9.034 -11.606  1.00 30.00           O
ATOM     41  N   LEU A  11      -5.995   7.355 -12.329  1.00 30.00           N
ATOM     42  CA  LEU A  11      -5.450   7.065 -11.014  1.00 30.00           C
ATOM     43  C   LEU A  11      -3.945   7.308 -11.018  1.00 30.00           C
ATOM     44  O   LEU A  11      -3.255   6.748 -11.856  1.00 30.00           O
ATOM     45  N   MET A  12      -3.463   8.081 -10.070  1.00 30.00           N
ATOM     46  CA  MET A  12      -2.031   8.276  -9.910  1.00 30.00           C
ATOM     47  C   MET A  12      -1.610   7.553  -8.629  1.00 30.00           C
ATOM     48  O   MET A  12      -2.131   7.883  -7.559  1.00 30.00           O
ATOM     49  N   ILE A  13      -0.716   6.577  -8.735  1.00 30.00           N
ATOM     50  CA  ILE A  13      -0.237   5.852  -7.558  1.00 30.00           C
ATOM     51  C   ILE A  13       1.178   6.374  -7.311  1.00 30.00           C
ATOM     52  O   ILE A  13       1.932   6.452  -8.278  1.00 30.00           O
ATOM     53  N   ASP A  14       1.385   7.049  -6.183  1.00 30.00           N
ATOM     54  CA  ASP A  14       2.670   7.728  -6.001  1.00 30.00           C
ATOM     55  C   ASP A  14       3.290   7.342  -4.664  1.00 30.00           C
ATOM     56  O   ASP A  14       2.645   6.748  -3.801  1.00 30.00           O
ATOM     57  N   GLY A  15       4.582   7.669  -4.539  1.00 30.00           N
ATOM     58  CA  GLY A  15       5.311   7.267  -3.347  1.00 30.00           C
ATOM     59  C   GLY A  15       6.774   7.671  -3.402  1.00 30.00           C
ATOM     60  O   GLY A  15       7.289   8.176  -4.402  1.00 30.00           O
ATOM     61  N   ILE A  16       7.452   7.373  -2.292  1.00 30.00           N
ATOM     62  CA  ILE A  16       8.877   7.672  -2.244  1.00 30.00           C
ATOM     63  C   ILE A  16       9.522   6.863  -1.140  1.00 30.00           C
ATOM     64  O   ILE A  16       8.870   6.375  -0.230  1.00 30.00           O
ATOM     65  N   LEU A  17      10.809   6.642  -1.320  1.00 30.00           N
ATOM     66  CA  LEU A  17      11.620   5.914  -0.355  1.00 30.00           C
ATOM     67  C   LEU A  17      12.752   6.893  -0.062  1.00 30.00           C
ATOM     68  O   LEU A  17      13.383   7.387  -1.009  1.00 30.00           O
ATOM     69  N   TRP A  18      12.758   7.424   1.160  1.00 30.00           N
ATOM     70  CA  TRP A  18      13.727   8.450   1.511  1.00 30.00           C
ATOM     71  C   TRP A  18      14.759   7.943   2.513  1.00 30.00           C
ATOM     72  O   TRP A  18      14.457   7.814   3.699  1.00 30.00           O
ATOM     73  CB  TRP A  18      12.886   9.602   2.129  1.00 30.00           C
ATOM     74  CG  TRP A  18      13.372  11.015   2.019  1.00110.00           C
ATOM     75  CD1 TRP A  18      14.303  11.543   1.154  1.00110.00           C
ATOM     76  CD2 TRP A  18      12.856  12.126   2.777  1.00110.00           C
ATOM     77  NE1 TRP A  18      14.325  12.907   1.302  1.00110.00           N
ATOM     78  CE3 TRP A  18      11.893  12.255   3.800  1.00110.00           C
ATOM     79  CE2 TRP A  18      13.484  13.284   2.320  1.00110.00           C
ATOM     80  CZ3 TRP A  18      11.625  13.516   4.347  1.00110.00           C
ATOM     81  CZ2 TRP A  18      13.226  14.554   2.849  1.00110.00           C
ATOM     82  CH2 TRP A  18      12.290  14.647   3.882  1.00110.00           C
ATOM     83  N   GLU A  19      15.986   7.731   2.037  1.00 30.00           N
ATOM     84  CA  GLU A  19      17.074   7.320   2.943  1.00 30.00           C
ATOM     85  C   GLU A  19      17.567   8.631   3.578  1.00 30.00           C
ATOM     86  O   GLU A  19      17.915   9.566   2.859  1.00 30.00           O
ATOM     87  N   GLY A  20      17.426   8.777   4.882  1.00 30.00           N
ATOM     88  CA  GLY A  20      17.599  10.056   5.538  1.00 30.00           C
ATOM     89  C   GLY A  20      18.322   9.912   6.876  1.00 30.00           C
ATOM     90  O   GLY A  20      17.981   9.041   7.666  1.00 30.00           O
ATOM     91  N   PHE A  21      19.288  10.805   7.095  1.00 30.00           N
ATOM     92  CA  PHE A  21      20.106  10.754   8.303  1.00 30.00           C
ATOM     93  C   PHE A  21      20.368  12.155   8.858  1.00 30.00           C
ATOM     94  O   PHE A  21      20.598  13.112   8.103  1.00 30.00           O
ATOM     95  CB  PHE A  21      21.442  10.061   7.940  1.00 30.00           C
ATOM     96  CG  PHE A  21      22.624  10.328   8.843  1.00110.00           C
ATOM     97  CD1 PHE A  21      22.852   9.555   9.985  1.00110.00           C
ATOM     98  CD2 PHE A  21      23.514  11.372   8.537  1.00110.00           C
ATOM     99  CE1 PHE A  21      23.958   9.819  10.798  1.00110.00           C
ATOM    100  CE2 PHE A  21      24.608  11.641   9.359  1.00110.00           C
ATOM    101  CZ  PHE A  21      24.831  10.862  10.490  1.00110.00           C
ATOM    102  N   GLY A  22      20.064  12.341  10.136  1.00 30.00           N
ATOM    103  CA  GLY A  22      20.280  13.604  10.824  1.00 30.00           C
ATOM    104  C   GLY A  22      21.576  13.521  11.648  1.00 30.00           C
ATOM    105  O   GLY A  22      21.800  12.572  12.399  1.00 30.00           O
ATOM    106  N   GLY A  23      22.361  14.567  11.536  1.00 30.00           N
ATOM    107  CA  GLY A  23      23.617  14.679  12.271  1.00 30.00           C
ATOM    108  C   GLY A  23      23.559  15.864  13.231  1.00 30.00           C
ATOM    109  O   GLY A  23      23.383  17.006  12.816  1.00 30.00           O
ATOM    110  N   ASP A  24      23.626  15.595  14.513  1.00 30.00           N
ATOM    111  CA  ASP A  24      23.678  16.570  15.583  1.00 30.00           C
ATOM    112  C   ASP A  24      24.618  16.063  16.685  1.00 30.00           C
ATOM    113  O   ASP A  24      25.002  14.893  16.717  1.00 30.00           O
ATOM    114  N   PRO A  25      25.102  16.971  17.570  1.00110.00           N
ATOM    115  CA  PRO A  25      25.894  16.618  18.746  1.00110.00           C
ATOM    116  C   PRO A  25      25.040  16.314  19.981  1.00110.00           C
ATOM    117  O   PRO A  25      25.603  15.918  21.000  1.00110.00           O
ATOM    118  N   CYS A  26      23.719  16.510  19.901  1.00110.00           N
ATOM    119  CA  CYS A  26      22.855  16.220  21.104  1.00110.00           C
ATOM    120  C   CYS A  26      21.652  15.340  20.752  1.00110.00           C
ATOM    121  O   CYS A  26      21.326  14.416  21.498  1.00110.00           O
ATOM    122  CB  CYS A  26      22.446  17.503  21.856  1.00110.00           C
ATOM    123  SG  CYS A  26      21.410  18.715  20.976  1.00110.00           S
ATOM    124  N   THR A  31      21.020  15.610  19.605  1.00110.00           N
ATOM    125  CA  THR A  31      19.885  14.849  19.102  1.00110.00           C
ATOM    126  C   THR A  31      20.258  14.383  17.676  1.00110.00           C
ATOM    127  O   THR A  31      21.431  14.179  17.353  1.00110.00           O
ATOM    128  N   TRP A  32      19.258  14.162  16.850  1.00110.00           N
ATOM    129  CA  TRP A  32      19.236  13.777  15.426  1.00110.00           C
ATOM    130  C   TRP A  32      17.774  14.291  15.318  1.00110.00           C
ATOM    131  O   TRP A  32      17.133  14.734  16.352  1.00110.00           O
ATOM    132  CB  TRP A  32      19.385  12.269  15.197  1.00  0.00           C
ATOM    133  CG  TRP A  32      18.357  11.386  15.838  1.00  0.00           C
ATOM    134  CD1 TRP A  32      17.235  10.919  15.246  1.00  0.00           C
ATOM    135  CD2 TRP A  32      18.349  10.849  17.197  1.00  0.00           C
ATOM    136  NE1 TRP A  32      16.538  10.127  16.139  1.00  0.00           N
ATOM    137  CE2 TRP A  32      17.177  10.053  17.359  1.00  0.00           C
ATOM    138  CE3 TRP A  32      19.214  10.952  18.308  1.00  0.00           C
ATOM    139  CZ2 TRP A  32      16.873   9.397  18.562  1.00  0.00           C
ATOM    140  CZ3 TRP A  32      18.919  10.301  19.522  1.00  0.00           C
ATOM    141  CH2 TRP A  32      17.752   9.526  19.650  1.00  0.00           C
ATOM    142  N   CYS A  33      17.331  14.334  14.065  1.00110.00           N1+
ATOM    143  CA  CYS A  33      16.065  14.911  13.703  1.00110.00           C
ATOM    144  C   CYS A  33      15.149  13.773  13.227  1.00110.00           C
ATOM    145  O   CYS A  33      14.483  13.131  14.043  1.00110.00           O
ATOM    146  CB  CYS A  33      16.214  16.065  12.705  1.00110.00           C
ATOM    147  SG  CYS A  33      14.600  16.877  12.358  1.00110.00           S
ATOM    148  N   ASP A  34      15.143  13.522  11.903  1.00110.00           N
ATOM    149  CA  ASP A  34      14.325  12.505  11.258  1.00110.00           C
ATOM    150  C   ASP A  34      15.230  11.332  10.856  1.00110.00           C
ATOM    151  O   ASP A  34      16.452  11.366  11.028  1.00110.00           O
ATOM    152  N   ALA A  35      14.603  10.289  10.319  1.00110.00           N
ATOM    153  CA  ALA A  35      15.255   9.072   9.851  1.00110.00           C
ATOM    154  C   ALA A  35      14.572   8.624   8.564  1.00110.00           C
ATOM    155  O   ALA A  35      13.620   9.269   8.125  1.00110.00           O
ATOM    156  N   ILE A  36      15.034   7.509   7.982  1.00 30.00           N
ATOM    157  CA  ILE A  36      14.503   6.884   6.787  1.00 30.00           C
ATOM    158  C   ILE A  36      12.998   6.670   6.851  1.00 30.00           C
ATOM    159  O   ILE A  36      12.420   6.328   7.896  1.00 30.00           O
ATOM    160  N   SER A  37      12.302   7.043   5.765  1.00 30.00           N
ATOM    161  CA  SER A  37      10.852   6.801   5.730  1.00 30.00           C
ATOM    162  C   SER A  37      10.426   6.552   4.283  1.00 30.00           C
ATOM    163  O   SER A  37      11.191   6.720   3.326  1.00 30.00           O
ATOM    164  N   MET A  38       9.193   6.080   4.115  1.00 30.00           N
ATOM    165  CA  MET A  38       8.646   5.872   2.769  1.00 30.00           C
ATOM    166  C   MET A  38       7.247   6.474   2.769  1.00 30.00           C
ATOM    167  O   MET A  38       6.656   6.636   3.837  1.00 30.00           O
ATOM    168  N   ARG A  39       6.752   6.808   1.588  1.00 30.00           N
ATOM    169  CA  ARG A  39       5.417   7.370   1.487  1.00 30.00           C
ATOM    170  C   ARG A  39       4.660   6.534   0.453  1.00 30.00           C
ATOM    171  O   ARG A  39       5.292   6.102  -0.499  1.00 30.00           O
ATOM    172  CB  ARG A  39       5.448   8.826   0.987  1.00 30.00           C
ATOM    173  CG  ARG A  39       6.039   9.839   1.976  1.00 30.00           C
ATOM    174  CD  ARG A  39       5.021  10.315   3.005  1.00 30.00           C
ATOM    175  NE  ARG A  39       5.592  11.267   3.961  1.00 30.00           N
ATOM    176  CZ  ARG A  39       5.877  12.560   3.758  1.00 30.00           C
ATOM    177  NH1 ARG A  39       5.709  13.155   2.577  1.00 30.00           N
ATOM    178  NH2 ARG A  39       6.341  13.274   4.783  1.00 30.00           N1+
ATOM    179  N   VAL A  40       3.370   6.341   0.643  1.00 30.00           N
ATOM    180  CA  VAL A  40       2.594   5.687  -0.415  1.00 30.00           C
ATOM    181  C   VAL A  40       1.272   6.463  -0.502  1.00 30.00           C
ATOM    182  O   VAL A  40       0.710   6.859   0.523  1.00 30.00           O
ATOM    183  N   GLY A  44       0.764   6.688  -1.704  1.00 30.00           N
ATOM    184  CA  GLY A  44      -0.511   7.403  -1.811  1.00 30.00           C
ATOM    185  C   GLY A  44      -1.132   7.125  -3.183  1.00 30.00           C
ATOM    186  O   GLY A  44      -0.489   6.627  -4.114  1.00 30.00           O
ATOM    187  N   TYR A  42      -2.400   7.497  -3.284  1.00 30.00           N
ATOM    188  CA  TYR A  42      -3.078   7.450  -4.558  1.00 30.00           C
ATOM    189  C   TYR A  42      -3.832   8.790  -4.694  1.00 30.00           C
ATOM    190  O   TYR A  42      -4.280   9.376  -3.707  1.00 30.00           O
ATOM    191  CB  TYR A  42      -4.107   6.314  -4.642  1.00 30.00           C
ATOM    192  CG  TYR A  42      -3.569   4.913  -4.451  1.00110.00           C
ATOM    193  CD1 TYR A  42      -3.290   4.410  -3.170  1.00110.00           C
ATOM    194  CD2 TYR A  42      -3.373   4.076  -5.552  1.00110.00           C
ATOM    195  CE1 TYR A  42      -2.818   3.109  -2.996  1.00110.00           C
ATOM    196  CE2 TYR A  42      -2.941   2.760  -5.377  1.00110.00           C
ATOM    197  CZ  TYR A  42      -2.647   2.291  -4.103  1.00110.00           C
ATOM    198  OH  TYR A  42      -2.173   1.028  -3.902  1.00110.00           O
ATOM    199  N   TYR A  43      -3.997   9.205  -5.945  1.00 30.00           N
ATOM    200  CA  TYR A  43      -4.771  10.376  -6.279  1.00 30.00           C
ATOM    201  C   TYR A  43      -5.631   9.954  -7.494  1.00 30.00           C
ATOM    202  O   TYR A  43      -5.066   9.576  -8.516  1.00 30.00           O
ATOM    203  CB  TYR A  43      -3.929  11.592  -6.705  1.00 30.00           C
ATOM    204  CG  TYR A  43      -3.187  12.320  -5.607  1.00110.00           C
ATOM    205  CD1 TYR A  43      -2.088  11.733  -4.965  1.00110.00           C
ATOM    206  CD2 TYR A  43      -3.554  13.627  -5.253  1.00110.00           C
ATOM    207  CE1 TYR A  43      -1.399  12.417  -3.962  1.00110.00           C
ATOM    208  CE2 TYR A  43      -2.861  14.317  -4.254  1.00110.00           C
ATOM    209  CZ  TYR A  43      -1.795  13.700  -3.608  1.00110.00           C
ATOM    210  OH  TYR A  43      -1.102  14.331  -2.616  1.00110.00           O
ATOM    211  N   GLY A  44      -6.928  10.071  -7.356  1.00 30.00           N
ATOM    212  CA  GLY A  44      -7.843   9.696  -8.423  1.00 30.00           C
ATOM    213  C   GLY A  44      -8.684  10.928  -8.805  1.00 30.00           C
ATOM    214  O   GLY A  44      -8.953  11.834  -8.024  1.00 30.00           O
ATOM    215  N   ASP A  49      -9.135  10.887 -10.042  1.00 30.00           N
ATOM    216  CA  ASP A  49      -9.944  11.928 -10.649  1.00 30.00           C
ATOM    217  C   ASP A  49     -10.790  11.293 -11.747  1.00 30.00           C
ATOM    218  O   ASP A  49     -10.245  10.583 -12.586  1.00 30.00           O
ATOM    219  N   PHE A  46     -12.089  11.472 -11.699  1.00 30.00           N
ATOM    220  CA  PHE A  46     -12.972  10.912 -12.710  1.00 30.00           C
ATOM    221  C   PHE A  46     -13.782  12.057 -13.323  1.00 30.00           C
ATOM    222  O   PHE A  46     -14.282  12.945 -12.632  1.00 30.00           O
ATOM    223  CB  PHE A  46     -13.579   9.599 -12.187  1.00 30.00           C
ATOM    224  CG  PHE A  46     -12.714   8.734 -11.250  1.00110.00           C
ATOM    225  CD1 PHE A  46     -11.400   8.355 -11.508  1.00110.00           C
ATOM    226  CD2 PHE A  46     -13.224   8.183 -10.101  1.00110.00           C
ATOM    227  CE1 PHE A  46     -10.675   7.396 -10.813  1.00110.00           C
ATOM    228  CE2 PHE A  46     -12.503   7.279  -9.338  1.00110.00           C
ATOM    229  CZ  PHE A  46     -11.289   6.784  -9.767  1.00110.00           C
ATOM    230  N   VAL A  51     -13.874  12.044 -14.643  1.00 30.00           N
ATOM    231  CA  VAL A  51     -14.641  13.064 -15.356  1.00 30.00           C
ATOM    232  C   VAL A  51     -16.063  12.533 -15.469  1.00 30.00           C
ATOM    233  O   VAL A  51     -16.252  11.537 -16.145  1.00 30.00           O
ATOM    234  N   PHE A  48     -17.049  13.084 -14.752  1.00110.00           N
ATOM    235  CA  PHE A  48     -18.437  12.624 -14.779  1.00110.00           C
ATOM    236  C   PHE A  48     -19.363  13.819 -14.638  1.00110.00           C
ATOM    237  O   PHE A  48     -20.287  13.792 -13.824  1.00110.00           O
ATOM    238  CB  PHE A  48     -18.677  11.451 -13.810  1.00110.00           C
ATOM    239  CG  PHE A  48     -18.008  10.186 -14.339  1.00110.00           C
ATOM    240  CD1 PHE A  48     -18.381   9.649 -15.594  1.00110.00           C
ATOM    241  CD2 PHE A  48     -16.957   9.586 -13.639  1.00110.00           C
ATOM    242  CE1 PHE A  48     -17.702   8.558 -16.142  1.00110.00           C
ATOM    243  CE2 PHE A  48     -16.304   8.470 -14.177  1.00110.00           C
ATOM    244  CZ  PHE A  48     -16.676   7.958 -15.420  1.00110.00           C
ATOM    245  N   ASP A  49     -19.042  14.891 -15.367  1.00110.00           N
ATOM    246  CA  ASP A  49     -19.785  16.148 -15.394  1.00110.00           C
ATOM    247  C   ASP A  49     -19.627  16.907 -14.061  1.00110.00           C
ATOM    248  O   ASP A  49     -20.310  17.898 -13.809  1.00110.00           O
ATOM    249  N   ARG A  50     -18.735  16.410 -13.199  1.00110.00           N
ATOM    250  CA  ARG A  50     -18.541  16.832 -11.769  1.00110.00           C
ATOM    251  C   ARG A  50     -17.091  16.718 -11.203  1.00110.00           C
ATOM    252  O   ARG A  50     -16.902  16.910 -10.000  1.00110.00           O
ATOM    253  CB  ARG A  50     -19.550  16.072 -10.881  1.00110.00           C
ATOM    254  CG  ARG A  50     -20.993  16.590 -10.946  1.00110.00           C
ATOM    255  CD  ARG A  50     -21.924  15.738 -10.084  1.00110.00           C
ATOM    256  NE  ARG A  50     -21.700  15.949  -8.650  1.00110.00           N
ATOM    257  CZ  ARG A  50     -22.238  15.188  -7.679  1.00110.00           C
ATOM    258  NH1 ARG A  50     -22.938  14.087  -7.945  1.00110.00           N
ATOM    259  NH2 ARG A  50     -22.077  15.544  -6.402  1.00110.00           N1+
ATOM    260  N   VAL A  51     -16.134  16.406 -12.097  1.00110.00           N
ATOM    261  CA  VAL A  51     -14.680  16.260 -11.868  1.00110.00           C
ATOM    262  C   VAL A  51     -14.379  15.922 -10.406  1.00110.00           C
ATOM    263  O   VAL A  51     -13.745  16.666  -9.657  1.00110.00           O
ATOM    264  N   LEU A  52     -14.976  14.816  -9.999  1.00110.00           N
ATOM    265  CA  LEU A  52     -14.929  14.255  -8.664  1.00110.00           C
ATOM    266  C   LEU A  52     -13.468  13.796  -8.486  1.00110.00           C
ATOM    267  O   LEU A  52     -12.764  13.593  -9.482  1.00110.00           O
ATOM    268  N   LYS A  53     -12.979  13.498  -7.285  1.00 30.00           N
ATOM    269  CA  LYS A  53     -11.580  13.209  -7.016  1.00 30.00           C
ATOM    270  C   LYS A  53     -11.458  12.678  -5.587  1.00 30.00           C
ATOM    271  O   LYS A  53     -12.328  12.895  -4.764  1.00 30.00           O
ATOM    272  CB  LYS A  53     -10.745  14.521  -7.007  1.00 30.00           C
ATOM    273  CG  LYS A  53     -10.139  14.976  -8.332  1.00110.00           C
ATOM    274  CD  LYS A  53      -9.282  16.245  -8.181  1.00110.00           C
ATOM    275  CE  LYS A  53      -7.967  16.023  -7.429  1.00110.00           C
ATOM    276  NZ  LYS A  53      -7.867  16.942  -6.279  1.00110.00           N1+
ATOM    277  N   THR A  54     -10.349  11.974  -5.364  1.00 30.00           N
ATOM    278  CA  THR A  54     -10.090  11.401  -4.051  1.00 30.00           C
ATOM    279  C   THR A  54      -8.573  11.290  -3.881  1.00 30.00           C
ATOM    280  O   THR A  54      -7.855  11.095  -4.864  1.00 30.00           O
ATOM    281  N   ASP A  55      -8.150  11.421  -2.636  1.00 30.00           N
ATOM    282  CA  ASP A  55      -6.705  11.286  -2.394  1.00 30.00           C
ATOM    283  C   ASP A  55      -6.479  10.642  -1.045  1.00 30.00           C
ATOM    284  O   ASP A  55      -7.249  10.830  -0.107  1.00 30.00           O
ATOM    285  N   VAL A  56      -5.452   9.809  -0.955  1.00 30.00           N
ATOM    286  CA  VAL A  56      -5.082   9.137   0.275  1.00 30.00           C
ATOM    287  C   VAL A  56      -3.552   9.063   0.262  1.00 30.00           C
ATOM    288  O   VAL A  56      -2.953   8.814  -0.773  1.00 30.00           O
ATOM    289  N   ASN A  57      -2.956   9.336   1.401  1.00 30.00           N
ATOM    290  CA  ASN A  57      -1.500   9.314   1.526  1.00 30.00           C
ATOM    291  C   ASN A  57      -1.112   8.867   2.934  1.00 30.00           C
ATOM    292  O   ASN A  57      -1.679   9.304   3.942  1.00 30.00           O
ATOM    293  N   LYS A  58      -0.139   7.980   2.970  1.00 30.00           N
ATOM    294  CA  LYS A  58       0.342   7.384   4.193  1.00 30.00           C
ATOM    295  C   LYS A  58       1.846   7.532   4.364  1.00 30.00           C
ATOM    296  O   LYS A  58       2.603   7.539   3.407  1.00 30.00           O
ATOM    297  CB  LYS A  58       0.023   5.881   4.155  1.00 30.00           C
ATOM    298  CG  LYS A  58      -1.469   5.579   3.964  1.00110.00           C
ATOM    299  CD  LYS A  58      -1.712   4.136   3.531  1.00110.00           C
ATOM    300  CE  LYS A  58      -1.359   3.860   2.076  1.00110.00           C
ATOM    301  NZ  LYS A  58      -1.485   2.409   1.819  1.00110.00           N1+
ATOM    302  N   GLU A  59       2.274   7.549   5.619  1.00 30.00           N
ATOM    303  CA  GLU A  59       3.668   7.671   5.980  1.00 30.00           C
ATOM    304  C   GLU A  59       4.088   6.376   6.677  1.00 30.00           C
ATOM    305  O   GLU A  59       3.459   6.040   7.678  1.00 30.00           O
ATOM    306  N   PHE A  60       5.066   5.683   6.140  1.00 30.00           N
ATOM    307  CA  PHE A  60       5.601   4.472   6.729  1.00 30.00           C
ATOM    308  C   PHE A  60       7.032   4.776   7.223  1.00 30.00           C
ATOM    309  O   PHE A  60       7.884   5.048   6.368  1.00 30.00           O
ATOM    310  CB  PHE A  60       5.492   3.278   5.786  1.00 30.00           C
ATOM    311  CG  PHE A  60       4.067   2.827   5.536  1.00 30.00           C
ATOM    312  CD1 PHE A  60       3.395   2.008   6.452  1.00 30.00           C
ATOM    313  CD2 PHE A  60       3.402   3.241   4.372  1.00 30.00           C
ATOM    314  CE1 PHE A  60       2.083   1.607   6.205  1.00 30.00           C
ATOM    315  CE2 PHE A  60       2.099   2.827   4.122  1.00 30.00           C
ATOM    316  CZ  PHE A  60       1.440   2.017   5.041  1.00 30.00           C
ATOM    317  N   GLN A  61       7.263   4.823   8.542  1.00110.00           N
ATOM    318  CA  GLN A  61       8.582   5.113   9.087  1.00110.00           C
ATOM    319  C   GLN A  61       8.598   4.947  10.594  1.00110.00           C
ATOM    320  O   GLN A  61       7.548   4.764  11.208  1.00110.00           O
ATOM    321  N   MET A  62       9.819   5.030  11.134  1.00110.00           N
ATOM    322  CA  MET A  62      10.145   4.975  12.555  1.00110.00           C
ATOM    323  C   MET A  62       9.555   3.694  13.161  1.00110.00           C
ATOM    324  O   MET A  62       9.054   3.686  14.285  1.00110.00           O
ATOM    325  N   GLY A  63       9.574   2.615  12.371  1.00110.00           N
ATOM    326  CA  GLY A  63       8.952   1.364  12.621  1.00110.00           C
ATOM    327  C   GLY A  63       7.499   1.399  12.706  1.00110.00           C
ATOM    328  O   GLY A  63       6.816   2.028  11.901  1.00110.00           O
ATOM    329  N   PRO A  87       6.979   0.722  13.735  1.00110.00           N
ATOM    330  CA  PRO A  87       5.604   0.749  14.221  1.00110.00           C
ATOM    331  C   PRO A  87       5.103   2.115  14.720  1.00110.00           C
ATOM    332  O   PRO A  87       4.573   2.203  15.827  1.00110.00           O
ATOM    333  N   ALA A  88       5.246   3.166  13.911  1.00110.00           N
ATOM    334  CA  ALA A  88       4.783   4.517  14.235  1.00110.00           C
ATOM    335  C   ALA A  88       4.541   5.312  12.946  1.00110.00           C
ATOM    336  O   ALA A  88       5.263   6.259  12.638  1.00110.00           O
ATOM    337  N   TYR A  89       3.525   4.898  12.192  1.00110.00           N
ATOM    338  CA  TYR A  89       3.156   5.474  10.906  1.00110.00           C
ATOM    339  C   TYR A  89       1.784   6.133  10.976  1.00110.00           C
ATOM    340  O   TYR A  89       1.150   6.143  12.031  1.00110.00           O
ATOM    341  CB  TYR A  89       3.145   4.288   9.878  1.00110.00           C
ATOM    342  CG  TYR A  89       2.541   2.957  10.297  1.00110.00           C
ATOM    343  CD1 TYR A  89       3.206   2.113  11.196  1.00110.00           C
ATOM    344  CD2 TYR A  89       1.310   2.541   9.784  1.00110.00           C
ATOM    345  CE1 TYR A  89       2.598   0.963  11.687  1.00110.00           C
ATOM    346  CE2 TYR A  89       0.722   1.359  10.239  1.00110.00           C
ATOM    347  CZ  TYR A  89       1.338   0.621  11.241  1.00110.00           C
ATOM    348  OH  TYR A  89       0.732  -0.433  11.857  1.00110.00           O
ATOM    349  N   GLY A  90       1.318   6.713   9.857  1.00 30.00           N
ATOM    350  CA  GLY A  90       0.020   7.361   9.880  1.00 30.00           C
ATOM    351  C   GLY A  90      -0.442   7.809   8.496  1.00 30.00           C
ATOM    352  O   GLY A  90       0.292   7.944   7.528  1.00 30.00           O
ATOM    353  N   LYS A  91      -1.749   7.993   8.451  1.00 30.00           N
ATOM    354  CA  LYS A  91      -2.395   8.509   7.257  1.00 30.00           C
ATOM    355  C   LYS A  91      -2.158  10.018   7.325  1.00 30.00           C
ATOM    356  O   LYS A  91      -2.475  10.634   8.352  1.00 30.00           O
ATOM    357  CB  LYS A  91      -3.899   8.177   7.262  1.00 30.00           C
ATOM    358  CG  LYS A  91      -4.703   8.928   8.336  1.00110.00           C
ATOM    359  CD  LYS A  91      -6.155   8.495   8.399  1.00110.00           C
ATOM    360  CE  LYS A  91      -6.959   9.466   9.249  1.00110.00           C
ATOM    361  NZ  LYS A  91      -8.390   9.133   9.115  1.00110.00           N1+
ATOM    362  N   HIS A  92      -1.690  10.602   6.248  1.00 30.00           N
ATOM    363  CA  HIS A  92      -1.488  12.058   6.254  1.00 30.00           C
ATOM    364  C   HIS A  92      -2.714  12.765   5.691  1.00 30.00           C
ATOM    365  O   HIS A  92      -3.189  13.783   6.190  1.00 30.00           O
ATOM    366  CB  HIS A  92      -0.239  12.392   5.402  1.00 30.00           C
ATOM    367  CG  HIS A  92       0.160  13.836   5.385  1.00110.00           C
ATOM    368  ND1 HIS A  92       0.433  14.576   6.512  1.00110.00           N
ATOM    369  CD2 HIS A  92       0.383  14.705   4.337  1.00110.00           C
ATOM    370  CE1 HIS A  92       0.754  15.844   6.103  1.00110.00           C
ATOM    371  NE2 HIS A  92       0.731  15.957   4.791  1.00110.00           N
ATOM    372  N   MET A  93      -3.250  12.234   4.598  1.00 30.00           N
ATOM    373  CA  MET A  93      -4.375  12.777   3.874  1.00 30.00           C
ATOM    374  C   MET A  93      -5.391  11.690   3.518  1.00 30.00           C
ATOM    375  O   MET A  93      -4.983  10.587   3.170  1.00 30.00           O
ATOM    376  N   GLN A  94      -6.671  12.019   3.611  1.00 30.00           N
ATOM    377  CA  GLN A  94      -7.738  11.078   3.219  1.00 30.00           C
ATOM    378  C   GLN A  94      -9.005  11.922   2.995  1.00 30.00           C
ATOM    379  O   GLN A  94      -9.657  12.338   3.944  1.00 30.00           O
ATOM    380  N   ASP A  95      -9.312  12.222   1.734  1.00 30.00           N
ATOM    381  CA  ASP A  95     -10.457  13.035   1.397  1.00 30.00           C
ATOM    382  C   ASP A  95     -10.993  12.711   0.010  1.00 30.00           C
ATOM    383  O   ASP A  95     -10.279  12.160  -0.815  1.00 30.00           O
ATOM    384  N   ALA A  96     -12.257  13.095  -0.180  1.00 30.00           N
ATOM    385  CA  ALA A  96     -12.900  12.923  -1.477  1.00 30.00           C
ATOM    386  C   ALA A  96     -13.674  14.231  -1.731  1.00 30.00           C
ATOM    387  O   ALA A  96     -14.070  14.927  -0.786  1.00 30.00           O
ATOM    388  N   GLU A  97     -13.867  14.577  -2.997  1.00 30.00           N
ATOM    389  CA  GLU A  97     -14.576  15.785  -3.323  1.00 30.00           C
ATOM    390  C   GLU A  97     -15.095  15.815  -4.762  1.00 30.00           C
ATOM    391  O   GLU A  97     -14.912  14.899  -5.555  1.00 30.00           O
ATOM    392  N   MET A  98     -15.709  16.952  -5.059  1.00 30.00           N
ATOM    393  CA  MET A  98     -16.292  17.214  -6.365  1.00 30.00           C
ATOM    394  C   MET A  98     -15.868  18.604  -6.824  1.00 30.00           C
ATOM    395  O   MET A  98     -15.786  19.530  -6.013  1.00 30.00           O
ATOM    396  N   PHE A  99     -15.597  18.752  -8.104  1.00 30.00           N
ATOM    397  CA  PHE A  99     -15.219  20.031  -8.685  1.00 30.00           C
ATOM    398  C   PHE A  99     -16.190  20.307  -9.840  1.00 30.00           C
ATOM    399  O   PHE A  99     -16.432  19.467 -10.708  1.00 30.00           O
ATOM    400  CB  PHE A  99     -13.744  19.992  -9.129  1.00 30.00           C
ATOM    401  CG  PHE A  99     -13.195  21.104  -9.995  1.00110.00           C
ATOM    402  CD1 PHE A  99     -13.579  22.441  -9.859  1.00110.00           C
ATOM    403  CD2 PHE A  99     -12.211  20.791 -10.946  1.00110.00           C
ATOM    404  CE1 PHE A  99     -13.052  23.424 -10.698  1.00110.00           C
ATOM    405  CE2 PHE A  99     -11.682  21.769 -11.787  1.00110.00           C
ATOM    406  CZ  PHE A  99     -12.114  23.085 -11.671  1.00110.00           C
ATOM    407  N   THR A 100     -16.826  21.478  -9.825  1.00 30.00           N
ATOM    408  CA  THR A 100     -17.820  21.779 -10.838  1.00 30.00           C
ATOM    409  C   THR A 100     -17.528  23.056 -11.595  1.00 30.00           C
ATOM    410  O   THR A 100     -17.621  24.135 -11.012  1.00 30.00           O
ATOM    411  N   ASN A 101     -17.121  22.942 -12.896  1.00 30.00           N
ATOM    412  CA  ASN A 101     -17.100  24.054 -13.845  1.00 30.00           C
ATOM    413  C   ASN A 101     -16.220  25.201 -13.296  1.00 30.00           C
ATOM    414  O   ASN A 101     -15.042  25.024 -12.970  1.00 30.00           O
ATOM    415  N   ALA A 102     -16.861  26.405 -13.115  1.00 30.00           N
ATOM    416  CA  ALA A 102     -16.261  27.539 -12.427  1.00 30.00           C
ATOM    417  C   ALA A 102     -16.966  27.836 -11.109  1.00 30.00           C
ATOM    418  O   ALA A 102     -16.771  28.923 -10.558  1.00 30.00           O
ATOM    419  N   ALA A 103     -17.832  26.965 -10.632  1.00 30.00           N
ATOM    420  CA  ALA A 103     -18.553  27.182  -9.375  1.00 30.00           C
ATOM    421  C   ALA A 103     -17.696  26.894  -8.156  1.00 30.00           C
ATOM    422  O   ALA A 103     -17.927  27.417  -7.063  1.00 30.00           O
ATOM    423  N   TYR A 104     -16.692  26.038  -8.318  1.00 30.00           N
ATOM    424  CA  TYR A 104     -15.779  25.666  -7.261  1.00 30.00           C
ATOM    425  C   TYR A 104     -15.676  24.162  -7.009  1.00 30.00           C
ATOM    426  O   TYR A 104     -16.276  23.294  -7.639  1.00 30.00           O
ATOM    427  CB  TYR A 104     -16.201  26.230  -5.799  1.00 30.00           C
ATOM    428  CG  TYR A 104     -17.433  25.697  -5.041  1.00110.00           C
ATOM    429  CD1 TYR A 104     -18.360  24.781  -5.563  1.00110.00           C
ATOM    430  CD2 TYR A 104     -17.654  26.178  -3.737  1.00110.00           C
ATOM    431  CE1 TYR A 104     -19.444  24.336  -4.799  1.00110.00           C
ATOM    432  CE2 TYR A 104     -18.743  25.746  -2.975  1.00110.00           C
ATOM    433  CZ  TYR A 104     -19.626  24.818  -3.510  1.00110.00           C
ATOM    434  OH  TYR A 104     -20.696  24.357  -2.799  1.00110.00           O
ATOM    435  N   MET A 105     -14.886  23.854  -5.996  1.00 30.00           N
ATOM    436  CA  MET A 105     -14.689  22.485  -5.532  1.00 30.00           C
ATOM    437  C   MET A 105     -15.057  22.405  -4.058  1.00 30.00           C
ATOM    438  O   MET A 105     -15.060  23.370  -3.304  1.00 30.00           O
ATOM    439  N   ALA A 106     -15.470  21.223  -3.663  1.00 30.00           N
ATOM    440  CA  ALA A 106     -15.808  20.930  -2.284  1.00 30.00           C
ATOM    441  C   ALA A 106     -15.236  19.555  -1.956  1.00 30.00           C
ATOM    442  O   ALA A 106     -15.493  18.626  -2.742  1.00 30.00           O
ATOM    443  N   LEU A 107     -14.531  19.454  -0.830  1.00 30.00           N
ATOM    444  CA  LEU A 107     -14.016  18.151  -0.427  1.00 30.00           C
ATOM    445  C   LEU A 107     -14.147  18.045   1.087  1.00 30.00           C
ATOM    446  O   LEU A 107     -14.338  19.043   1.777  1.00 30.00           O
ATOM    447  N   ASN A 108     -14.150  16.813   1.584  1.00 30.00           N
ATOM    448  CA  ASN A 108     -14.279  16.581   3.008  1.00 30.00           C
ATOM    449  C   ASN A 108     -13.343  15.422   3.376  1.00 30.00           C
ATOM    450  O   ASN A 108     -13.184  14.481   2.600  1.00 30.00           O
ATOM    451  N   ILE A 109     -12.750  15.489   4.560  1.00 30.00           N
ATOM    452  CA  ILE A 109     -11.897  14.440   5.077  1.00 30.00           C
ATOM    453  C   ILE A 109     -10.687  15.009   5.811  1.00 30.00           C
ATOM    454  O   ILE A 109     -10.765  16.086   6.404  1.00 30.00           O
ATOM    455  N   TRP A 110      -9.584  14.253   5.796  1.00 30.00           N
ATOM    456  CA  TRP A 110      -8.347  14.703   6.405  1.00 30.00           C
ATOM    457  C   TRP A 110      -7.602  15.471   5.299  1.00 30.00           C
ATOM    458  O   TRP A 110      -7.236  14.879   4.290  1.00 30.00           O
ATOM    459  CB  TRP A 110      -7.461  13.588   6.974  1.00 30.00           C
ATOM    460  CG  TRP A 110      -6.417  14.092   7.941  1.00110.00           C
ATOM    461  CD1 TRP A 110      -5.382  14.955   7.642  1.00110.00           C
ATOM    462  CD2 TRP A 110      -6.291  13.788   9.339  1.00110.00           C
ATOM    463  NE1 TRP A 110      -4.588  15.102   8.749  1.00110.00           N
ATOM    464  CE3 TRP A 110      -7.048  13.037  10.260  1.00110.00           C
ATOM    465  CE2 TRP A 110      -5.130  14.410   9.805  1.00110.00           C
ATOM    466  CZ3 TRP A 110      -6.622  12.927  11.590  1.00110.00           C
ATOM    467  CZ2 TRP A 110      -4.687  14.310  11.130  1.00110.00           C
ATOM    468  CH2 TRP A 110      -5.457  13.555  12.017  1.00110.00           C
ATOM    469  N   ASP A 111      -7.422  16.760   5.513  1.00 30.00           N
ATOM    470  CA  ASP A 111      -6.791  17.620   4.513  1.00 30.00           C
ATOM    471  C   ASP A 111      -6.056  18.758   5.206  1.00 30.00           C
ATOM    472  O   ASP A 111      -5.955  18.824   6.436  1.00 30.00           O
ATOM    473  N   ARG A 112      -5.255  18.424   4.638  1.00 30.00           N
ATOM    474  CA  ARG A 112      -4.646  19.646   5.145  1.00 30.00           C
ATOM    475  C   ARG A 112      -5.828  20.610   5.167  1.00 30.00           C
ATOM    476  O   ARG A 112      -6.702  20.532   4.303  1.00 30.00           O
ATOM    477  CB  ARG A 112      -3.574  20.079   4.097  1.00 30.00           C
ATOM    478  CG  ARG A 112      -2.368  19.121   4.174  1.00110.00           C
ATOM    479  CD  ARG A 112      -1.289  19.396   3.136  1.00110.00           C
ATOM    480  NE  ARG A 112      -0.166  18.466   3.318  1.00110.00           N
ATOM    481  CZ  ARG A 112       0.971  18.478   2.609  1.00110.00           C
ATOM    482  NH1 ARG A 112       1.186  19.362   1.633  1.00110.00           N
ATOM    483  NH2 ARG A 112       1.918  17.582   2.887  1.00110.00           N1+
ATOM    484  N   PHE A 113      -7.561  24.209   4.574  1.00 30.00           N1+
ATOM    485  CA  PHE A 113      -7.248  25.240   3.575  1.00 30.00           C
ATOM    486  C   PHE A 113      -6.138  26.226   3.926  1.00 30.00           C
ATOM    487  O   PHE A 113      -5.284  26.532   3.087  1.00 30.00           O
ATOM    488  CB  PHE A 113      -8.482  25.776   2.865  1.00 30.00           C
ATOM    489  CG  PHE A 113      -8.732  24.947   1.595  1.00110.00           C
ATOM    490  CD1 PHE A 113      -7.708  24.636   0.662  1.00110.00           C
ATOM    491  CD2 PHE A 113     -10.022  24.547   1.281  1.00110.00           C
ATOM    492  CE1 PHE A 113      -7.934  23.823  -0.443  1.00110.00           C
ATOM    493  CE2 PHE A 113     -10.260  23.822   0.110  1.00110.00           C
ATOM    494  CZ  PHE A 113      -9.216  23.390  -0.700  1.00110.00           C
ATOM    495  N   ASP A 114      -6.112  26.733   5.156  1.00110.00           N
ATOM    496  CA  ASP A 114      -5.089  27.676   5.593  1.00110.00           C
ATOM    497  C   ASP A 114      -3.713  26.987   5.538  1.00110.00           C
ATOM    498  O   ASP A 114      -2.776  27.499   4.924  1.00110.00           O
ATOM    499  N   VAL A 115      -3.628  25.780   6.105  1.00110.00           N
ATOM    500  CA  VAL A 115      -2.419  24.958   6.112  1.00110.00           C
ATOM    501  C   VAL A 115      -1.989  24.618   4.674  1.00110.00           C
ATOM    502  O   VAL A 115      -0.829  24.810   4.317  1.00110.00           O
ATOM    503  N   PHE A 116      -2.932  24.134   3.858  1.00110.00           N
ATOM    504  CA  PHE A 116      -2.621  23.753   2.448  1.00110.00           C
ATOM    505  C   PHE A 116      -1.929  24.883   1.559  1.00110.00           C
ATOM    506  O   PHE A 116      -0.921  24.661   0.883  1.00110.00           O
ATOM    507  CB  PHE A 116      -3.913  23.306   1.729  1.00110.00           C
ATOM    508  CG  PHE A 116      -3.699  22.700   0.358  1.00110.00           C
ATOM    509  CD1 PHE A 116      -3.237  21.386   0.221  1.00110.00           C
ATOM    510  CD2 PHE A 116      -3.954  23.445  -0.802  1.00110.00           C
ATOM    511  CE1 PHE A 116      -3.032  20.827  -1.043  1.00110.00           C
ATOM    512  CE2 PHE A 116      -3.751  22.887  -2.066  1.00110.00           C
ATOM    513  CZ  PHE A 116      -3.290  21.578  -2.187  1.00110.00           C
ATOM    514  N   CYS A 117      -2.500  26.088   1.598  1.00 30.00           N
ATOM    515  CA  CYS A 117      -2.082  27.224   0.792  1.00 30.00           C
ATOM    516  C   CYS A 117      -0.839  27.930   1.323  1.00 30.00           C
ATOM    517  O   CYS A 117       0.112  28.169   0.583  1.00 30.00           O
ATOM    518  CB  CYS A 117      -3.250  28.170   0.545  1.00 30.00           C
ATOM    519  SG  CYS A 117      -4.803  27.384  -0.034  1.00110.00           S
ATOM    520  N   THR A 118      -0.836  28.236   2.613  1.00 30.00           N
ATOM    521  CA  THR A 118       0.269  28.976   3.210  1.00 30.00           C
ATOM    522  C   THR A 118       1.624  28.300   3.381  1.00 30.00           C
ATOM    523  O   THR A 118       2.643  28.990   3.458  1.00 30.00           O
ATOM    524  N   LEU A 119       1.662  26.969   3.438  1.00 30.00           N
ATOM    525  CA  LEU A 119       2.947  26.288   3.574  1.00 30.00           C
ATOM    526  C   LEU A 119       3.683  26.298   2.231  1.00 30.00           C
ATOM    527  O   LEU A 119       4.860  25.952   2.154  1.00 30.00           O
ATOM    528  N   GLY A 120       2.991  26.708   1.172  1.00 30.00           N
ATOM    529  CA  GLY A 120       3.615  26.760  -0.145  1.00 30.00           C
ATOM    530  C   GLY A 120       4.697  27.840  -0.199  1.00 30.00           C
ATOM    531  O   GLY A 120       5.513  27.856  -1.119  1.00 30.00           O
ATOM    532  N   ALA A 121       4.714  28.734   0.787  1.00 30.00           N
ATOM    533  CA  ALA A 121       5.721  29.799   0.821  1.00 30.00           C
ATOM    534  C   ALA A 121       6.986  29.363   1.566  1.00 30.00           C
ATOM    535  O   ALA A 121       7.978  30.083   1.609  1.00 30.00           O
ATOM    536  N   THR A 122       6.942  28.168   2.143  1.00 30.00           N
ATOM    537  CA  THR A 122       8.075  27.614   2.868  1.00 30.00           C
ATOM    538  C   THR A 122       8.964  26.968   1.808  1.00 30.00           C
ATOM    539  O   THR A 122       8.565  25.996   1.176  1.00 30.00           O
ATOM    540  N   THR A 123      10.160  27.502   1.601  1.00 30.00           N
ATOM    541  CA  THR A 123      11.058  26.946   0.591  1.00 30.00           C
ATOM    542  C   THR A 123      11.501  25.526   0.913  1.00 30.00           C
ATOM    543  O   THR A 123      12.000  24.821   0.039  1.00 30.00           O
ATOM    544  N   GLY A 124      11.328  25.100   2.162  1.00 30.00           N
ATOM    545  CA  GLY A 124      11.712  23.744   2.537  1.00 30.00           C
ATOM    546  C   GLY A 124      10.531  22.786   2.689  1.00 30.00           C
ATOM    547  O   GLY A 124      10.632  21.732   3.314  1.00 30.00           O
ATOM    548  N   TYR A 125       9.412  23.174   2.091  1.00 30.00           N
ATOM    549  CA  TYR A 125       8.196  22.375   2.054  1.00 30.00           C
ATOM    550  C   TYR A 125       7.739  21.708   3.345  1.00 30.00           C
ATOM    551  O   TYR A 125       7.356  20.534   3.338  1.00 30.00           O
ATOM    552  CB  TYR A 125       8.297  21.332   0.907  1.00 30.00           C
ATOM    553  CG  TYR A 125       8.471  21.975  -0.456  1.00110.00           C
ATOM    554  CD1 TYR A 125       7.364  22.508  -1.134  1.00110.00           C
ATOM    555  CD2 TYR A 125       9.743  22.085  -1.035  1.00110.00           C
ATOM    556  CE1 TYR A 125       7.529  23.143  -2.366  1.00110.00           C
ATOM    557  CE2 TYR A 125       9.908  22.721  -2.268  1.00110.00           C
ATOM    558  CZ  TYR A 125       8.799  23.247  -2.923  1.00110.00           C
ATOM    559  OH  TYR A 125       8.918  23.882  -4.125  1.00110.00           O
ATOM    560  N   LEU A 126       7.768  22.456   4.443  1.00 30.00           N
ATOM    561  CA  LEU A 126       7.320  21.953   5.737  1.00 30.00           C
ATOM    562  C   LEU A 126       7.880  20.586   6.133  1.00 30.00           C
ATOM    563  O   LEU A 126       7.196  19.807   6.794  1.00 30.00           O
ATOM    564  N   LYS A 127       9.110  20.286   5.729  1.00 30.00           N
ATOM    565  CA  LYS A 127       9.719  19.007   6.088  1.00 30.00           C
ATOM    566  C   LYS A 127      11.233  19.181   6.227  1.00 30.00           C
ATOM    567  O   LYS A 127      11.781  20.215   5.839  1.00 30.00           O
ATOM    568  CB  LYS A 127       9.345  17.894   5.091  1.00 30.00           C
ATOM    569  CG  LYS A 127       9.897  18.079   3.672  1.00110.00           C
ATOM    570  CD  LYS A 127       9.323  17.013   2.731  1.00110.00           C
ATOM    571  CE  LYS A 127       9.887  17.134   1.323  1.00110.00           C
ATOM    572  NZ  LYS A 127       9.267  16.107   0.460  1.00110.00           N1+
ATOM    573  N   GLY A 128      11.902  18.178   6.787  1.00 30.00           N
ATOM    574  CA  GLY A 128      13.342  18.264   6.954  1.00 30.00           C
ATOM    575  C   GLY A 128      13.727  18.942   8.255  1.00 30.00           C
ATOM    576  O   GLY A 128      12.855  19.375   9.009  1.00 30.00           O
ATOM    577  N   ASN A 129      15.030  19.044   8.510  1.00 30.00           N
ATOM    578  CA  ASN A 129      15.546  19.659   9.738  1.00 30.00           C
ATOM    579  C   ASN A 129      15.175  21.106   9.983  1.00 30.00           C
ATOM    580  O   ASN A 129      14.981  21.499  11.130  1.00 30.00           O
ATOM    581  N   SER A 130      15.088  21.906   8.928  1.00 30.00           N
ATOM    582  CA  SER A 130      14.775  23.309   9.135  1.00 30.00           C
ATOM    583  C   SER A 130      13.694  23.973   8.305  1.00 30.00           C
ATOM    584  O   SER A 130      13.977  24.911   7.566  1.00 30.00           O
ATOM    585  N   ALA A 131      12.440  23.508   8.390  1.00 30.00           N
ATOM    586  CA  ALA A 131      11.396  24.164   7.597  1.00 30.00           C
ATOM    587  C   ALA A 131      10.829  25.298   8.451  1.00 30.00           C
ATOM    588  O   ALA A 131      11.350  25.588   9.528  1.00 30.00           O
ATOM    589  N   SER A 132       9.771  25.940   7.973  1.00 30.00           N
ATOM    590  CA  SER A 132       9.122  26.991   8.747  1.00 30.00           C
ATOM    591  C   SER A 132       8.358  26.262   9.855  1.00 30.00           C
ATOM    592  O   SER A 132       7.520  25.405   9.566  1.00 30.00           O
ATOM    593  N   PHE A 133       8.631  26.602  11.112  1.00 30.00           N
ATOM    594  CA  PHE A 133       7.987  25.941  12.247  1.00 30.00           C
ATOM    595  C   PHE A 133       6.787  26.651  12.878  1.00 30.00           C
ATOM    596  O   PHE A 133       6.376  26.305  13.986  1.00 30.00           O
ATOM    597  CB  PHE A 133       9.045  25.612  13.336  1.00 30.00           C
ATOM    598  CG  PHE A 133       9.981  24.472  12.971  1.00110.00           C
ATOM    599  CD1 PHE A 133       9.484  23.188  12.695  1.00110.00           C
ATOM    600  CD2 PHE A 133      11.367  24.670  12.956  1.00110.00           C
ATOM    601  CE1 PHE A 133      10.351  22.140  12.375  1.00110.00           C
ATOM    602  CE2 PHE A 133      12.234  23.620  12.644  1.00110.00           C
ATOM    603  CZ  PHE A 133      11.726  22.357  12.347  1.00110.00           C
ATOM    604  N   ASN A 134       6.219  27.631  12.178  1.00 30.00           N
ATOM    605  CA  ASN A 134       5.077  28.348  12.718  1.00 30.00           C
ATOM    606  C   ASN A 134       3.863  27.469  12.976  1.00 30.00           C
ATOM    607  O   ASN A 134       3.099  27.703  13.918  1.00 30.00           O
ATOM    608  N   LEU A 135       3.669  26.463  12.131  1.00 30.00           N
ATOM    609  CA  LEU A 135       2.543  25.554  12.285  1.00 30.00           C
ATOM    610  C   LEU A 135       2.873  24.463  13.302  1.00 30.00           C
ATOM    611  O   LEU A 135       3.285  23.362  12.939  1.00 30.00           O
ATOM    612  N   VAL A 136       2.724  24.787  14.582  1.00 30.00           N
ATOM    613  CA  VAL A 136       2.979  23.809  15.626  1.00 30.00           C
ATOM    614  C   VAL A 136       2.132  24.105  16.851  1.00 30.00           C
ATOM    615  O   VAL A 136       1.516  25.171  16.957  1.00 30.00           O
ATOM    616  N   GLY A 137       2.093  23.137  17.758  1.00 30.00           N
ATOM    617  CA  GLY A 137       1.306  23.221  18.985  1.00 30.00           C
ATOM    618  C   GLY A 137       2.091  24.008  20.034  1.00 30.00           C
ATOM    619  O   GLY A 137       2.652  23.426  20.946  1.00 30.00           O
ATOM    620  N   LEU A 138       2.113  25.332  19.907  1.00 30.00           N
ATOM    621  CA  LEU A 138       2.862  26.179  20.835  1.00 30.00           C
ATOM    622  C   LEU A 138       2.403  26.141  22.284  1.00 30.00           C
ATOM    623  O   LEU A 138       3.212  26.313  23.199  1.00 30.00           O
ATOM    624  N   PHE A 139       1.109  25.926  22.503  1.00 30.00           N
ATOM    625  CA  PHE A 139       0.572  25.925  23.861  1.00 30.00           C
ATOM    626  C   PHE A 139       0.404  24.553  24.497  1.00 30.00           C
ATOM    627  O   PHE A 139      -0.156  24.440  25.582  1.00 30.00           O
ATOM    628  CB  PHE A 139      -0.842  26.568  23.867  1.00 30.00           C
ATOM    629  CG  PHE A 139      -0.853  28.074  23.776  1.00110.00           C
ATOM    630  CD1 PHE A 139      -0.895  28.854  24.941  1.00110.00           C
ATOM    631  CD2 PHE A 139      -0.875  28.709  22.531  1.00110.00           C
ATOM    632  CE1 PHE A 139      -0.954  30.245  24.859  1.00110.00           C
ATOM    633  CE2 PHE A 139      -0.961  30.097  22.453  1.00110.00           C
ATOM    634  CZ  PHE A 139      -0.986  30.867  23.614  1.00110.00           C
ATOM    635  N   GLY A 140       0.900  23.514  23.839  1.00 30.00           N
ATOM    636  CA  GLY A 140       0.754  22.167  24.375  1.00 30.00           C
ATOM    637  C   GLY A 140      -0.736  21.863  24.494  1.00 30.00           C
ATOM    638  O   GLY A 140      -1.197  21.292  25.487  1.00 30.00           O
ATOM    639  N   THR A 141      -1.560  22.253  23.509  1.00110.00           N
ATOM    640  CA  THR A 141      -2.992  21.988  23.463  1.00110.00           C
ATOM    641  C   THR A 141      -3.206  20.479  23.221  1.00110.00           C
ATOM    642  O   THR A 141      -3.440  20.041  22.093  1.00110.00           O
ATOM    643  N   LYS A 142      -3.080  19.699  24.297  1.00110.00           N
ATOM    644  CA  LYS A 142      -2.982  18.292  24.288  1.00110.00           C
ATOM    645  C   LYS A 142      -4.201  17.436  23.951  1.00110.00           C
ATOM    646  O   LYS A 142      -4.005  16.399  23.317  1.00110.00           O
ATOM    647  CB  LYS A 142      -2.557  17.794  25.706  1.00110.00           C
ATOM    648  CG  LYS A 142      -1.039  17.857  25.920  1.00110.00           C
ATOM    649  CD  LYS A 142      -0.662  17.465  27.351  1.00110.00           C
ATOM    650  CE  LYS A 142       0.844  17.532  27.568  1.00110.00           C
ATOM    651  NZ  LYS A 142       1.158  17.149  28.958  1.00110.00           N1+
ATOM    652  N   THR A 143      -5.417  17.831  24.341  1.00110.00           N
ATOM    653  CA  THR A 143      -6.642  17.093  24.045  1.00110.00           C
ATOM    654  C   THR A 143      -7.053  17.357  22.587  1.00110.00           C
ATOM    655  O   THR A 143      -8.020  16.769  22.102  1.00110.00           O
ATOM    656  N   GLN A 144      -6.304  18.226  21.907  1.00110.00           N
ATOM    657  CA  GLN A 144      -6.450  18.507  20.495  1.00110.00           C
ATOM    658  C   GLN A 144      -5.444  17.652  19.732  1.00110.00           C
ATOM    659  O   GLN A 144      -4.236  17.785  19.914  1.00110.00           O
ATOM    660  N   SER A 145      -5.953  16.803  18.850  1.00 30.00           N
ATOM    661  CA  SER A 145      -5.154  15.927  17.990  1.00 30.00           C
ATOM    662  C   SER A 145      -4.329  16.685  16.936  1.00 30.00           C
ATOM    663  O   SER A 145      -3.195  16.305  16.623  1.00 30.00           O
ATOM    664  N   SER A 146      -4.896  17.756  16.392  1.00 30.00           N
ATOM    665  CA  SER A 146      -4.205  18.520  15.368  1.00 30.00           C
ATOM    666  C   SER A 146      -4.000  19.977  15.747  1.00 30.00           C
ATOM    667  O   SER A 146      -4.281  20.875  14.958  1.00 30.00           O
ATOM    668  N   SER A 147      -3.574  20.211  16.995  1.00110.00           N
ATOM    669  CA  SER A 147      -3.260  21.529  17.513  1.00110.00           C
ATOM    670  C   SER A 147      -2.133  22.198  16.700  1.00110.00           C
ATOM    671  O   SER A 147      -1.053  21.620  16.570  1.00110.00           O
ATOM    672  N   PRO A 155      -2.357  23.406  16.160  1.00110.00           N
ATOM    673  CA  PRO A 155      -3.603  24.166  16.247  1.00110.00           C
ATOM    674  C   PRO A 155      -4.566  23.650  15.171  1.00110.00           C
ATOM    675  O   PRO A 155      -4.225  23.758  14.000  1.00110.00           O
ATOM    676  N   ASN A 156      -5.703  23.054  15.571  1.00110.00           N
ATOM    677  CA  ASN A 156      -6.832  22.506  14.719  1.00110.00           C
ATOM    678  C   ASN A 156      -7.091  21.063  14.122  1.00110.00           C
ATOM    679  O   ASN A 156      -6.642  20.865  13.001  1.00110.00           O
ATOM    680  N   THR A 157      -7.752  20.095  14.805  1.00110.00           N
ATOM    681  CA  THR A 157      -8.037  18.724  14.304  1.00110.00           C
ATOM    682  C   THR A 157      -8.467  18.743  12.847  1.00110.00           C
ATOM    683  O   THR A 157      -9.436  19.430  12.545  1.00110.00           O
ATOM    684  N   ALA A 158      -7.741  18.010  11.992  1.00110.00           N
ATOM    685  CA  ALA A 158      -7.947  18.033  10.549  1.00110.00           C
ATOM    686  C   ALA A 158      -8.902  16.910  10.141  1.00110.00           C
ATOM    687  O   ALA A 158      -9.177  16.730   8.959  1.00110.00           O
ATOM    688  N   LEU A 159      -9.459  16.163  11.103  1.00 30.00           N
ATOM    689  CA  LEU A 159     -10.378  15.046  10.890  1.00 30.00           C
ATOM    690  C   LEU A 159     -11.750  15.653  10.595  1.00 30.00           C
ATOM    691  O   LEU A 159     -11.975  16.830  10.865  1.00 30.00           O
ATOM    692  N   ASN A 160     -12.651  14.851  10.031  1.00 30.00           N
ATOM    693  CA  ASN A 160     -14.021  15.288   9.779  1.00 30.00           C
ATOM    694  C   ASN A 160     -14.113  16.608   9.034  1.00 30.00           C
ATOM    695  O   ASN A 160     -15.015  17.415   9.293  1.00 30.00           O
ATOM    696  N   GLU A 161     -13.205  16.815   8.089  1.00 30.00           N
ATOM    697  CA  GLU A 161     -13.155  18.059   7.348  1.00 30.00           C
ATOM    698  C   GLU A 161     -13.948  18.135   6.039  1.00 30.00           C
ATOM    699  O   GLU A 161     -14.011  17.177   5.262  1.00 30.00           O
ATOM    700  N   ALA A 162     -14.565  19.291   5.819  1.00 30.00           N
ATOM    701  CA  ALA A 162     -15.295  19.565   4.590  1.00 30.00           C
ATOM    702  C   ALA A 162     -14.679  20.850   4.064  1.00 30.00           C
ATOM    703  O   ALA A 162     -14.672  21.866   4.755  1.00 30.00           O
ATOM    704  N   VAL A 163     -14.142  20.793   2.851  1.00 30.00           N
ATOM    705  CA  VAL A 163     -13.515  21.950   2.231  1.00 30.00           C
ATOM    706  C   VAL A 163     -14.166  22.384   0.922  1.00 30.00           C
ATOM    707  O   VAL A 163     -14.778  21.582   0.209  1.00 30.00           O
ATOM    708  N   VAL A 164     -14.022  23.670   0.621  1.00 30.00           N
ATOM    709  CA  VAL A 164     -14.529  24.235  -0.618  1.00 30.00           C
ATOM    710  C   VAL A 164     -13.470  25.167  -1.187  1.00 30.00           C
ATOM    711  O   VAL A 164     -13.030  26.099  -0.516  1.00 30.00           O
ATOM    712  N   GLU A 165     -13.054  24.887  -2.416  1.00 30.00           N
ATOM    713  CA  GLU A 165     -12.064  25.704  -3.100  1.00 30.00           C
ATOM    714  C   GLU A 165     -12.712  26.298  -4.346  1.00 30.00           C
ATOM    715  O   GLU A 165     -13.323  25.586  -5.147  1.00 30.00           O
ATOM    716  N   LEU A 166     -12.584  27.609  -4.495  1.00 30.00           N
ATOM    717  CA  LEU A 166     -13.158  28.309  -5.634  1.00 30.00           C
ATOM    718  C   LEU A 166     -12.293  28.121  -6.867  1.00 30.00           C
ATOM    719  O   LEU A 166     -11.152  27.663  -6.782  1.00 30.00           O
ATOM    720  N   TYR A 167     -12.845  28.444  -8.046  1.00 30.00           N
ATOM    721  CA  TYR A 167     -12.033  28.299  -9.251  1.00 30.00           C
ATOM    722  C   TYR A 167     -11.173  29.555  -9.257  1.00 30.00           C
ATOM    723  O   TYR A 167     -11.329  30.408  -8.381  1.00 30.00           O
ATOM    724  CB  TYR A 167     -12.983  28.265 -10.471  1.00 30.00           C
ATOM    725  CG  TYR A 167     -12.349  28.026 -11.824  1.00110.00           C
ATOM    726  CD1 TYR A 167     -11.563  26.892 -12.068  1.00110.00           C
ATOM    727  CD2 TYR A 167     -12.553  28.944 -12.867  1.00110.00           C
ATOM    728  CE1 TYR A 167     -10.980  26.689 -13.321  1.00110.00           C
ATOM    729  CE2 TYR A 167     -11.976  28.738 -14.122  1.00110.00           C
ATOM    730  CZ  TYR A 167     -11.193  27.611 -14.339  1.00110.00           C
ATOM    731  OH  TYR A 167     -10.609  27.372 -15.550  1.00110.00           O
ATOM    732  N   ILE A 168     -10.267  29.686 -10.216  1.00 30.00           N
ATOM    733  CA  ILE A 168      -9.418  30.871 -10.256  1.00 30.00           C
ATOM    734  C   ILE A 168     -10.086  31.970 -11.077  1.00 30.00           C
ATOM    735  O   ILE A 168     -10.581  31.721 -12.179  1.00 30.00           O
ATOM    736  N   ASN A 169     -10.103  33.182 -10.530  1.00 30.00           N
ATOM    737  CA  ASN A 169     -10.717  34.330 -11.195  1.00 30.00           C
ATOM    738  C   ASN A 169      -9.708  35.450 -11.414  1.00 30.00           C
ATOM    739  O   ASN A 169      -9.552  36.329 -10.565  1.00 30.00           O
ATOM    740  N   THR A 170      -9.029  35.417 -12.556  1.00 30.00           N
ATOM    741  CA  THR A 170      -8.045  36.438 -12.864  1.00 30.00           C
ATOM    742  C   THR A 170      -7.009  36.575 -11.768  1.00 30.00           C
ATOM    743  O   THR A 170      -6.711  37.683 -11.319  1.00 30.00           O
ATOM    744  N   THR A 171      -6.465  35.444 -11.327  1.00 30.00           N
ATOM    745  CA  THR A 171      -5.461  35.467 -10.278  1.00 30.00           C
ATOM    746  C   THR A 171      -6.019  35.209  -8.890  1.00 30.00           C
ATOM    747  O   THR A 171      -5.376  34.540  -8.077  1.00 30.00           O
ATOM    748  N   PHE A 172      -7.213  35.734  -8.619  1.00 30.00           N
ATOM    749  CA  PHE A 172      -7.846  35.560  -7.316  1.00 30.00           C
ATOM    750  C   PHE A 172      -8.410  34.158  -7.098  1.00 30.00           C
ATOM    751  O   PHE A 172      -9.031  33.571  -7.986  1.00 30.00           O
ATOM    752  CB  PHE A 172      -9.016  36.541  -7.090  1.00 30.00           C
ATOM    753  CG  PHE A 172      -8.577  37.975  -6.895  1.00 30.00           C
ATOM    754  CD1 PHE A 172      -8.077  38.397  -5.653  1.00 30.00           C
ATOM    755  CD2 PHE A 172      -8.663  38.900  -7.944  1.00 30.00           C
ATOM    756  CE1 PHE A 172      -7.679  39.721  -5.464  1.00 30.00           C
ATOM    757  CE2 PHE A 172      -8.263  40.224  -7.752  1.00 30.00           C
ATOM    758  CZ  PHE A 172      -7.773  40.634  -6.513  1.00 30.00           C
ATOM    759  N   ALA A 173      -8.189  33.628  -5.901  1.00 30.00           N
ATOM    760  CA  ALA A 173      -8.668  32.302  -5.549  1.00 30.00           C
ATOM    761  C   ALA A 173      -8.772  32.194  -4.035  1.00 30.00           C
ATOM    762  O   ALA A 173      -7.978  32.784  -3.305  1.00 30.00           O
ATOM    763  N   TRP A 174      -9.770  31.456  -3.562  1.00 30.00           N
ATOM    764  CA  TRP A 174      -9.965  31.294  -2.127  1.00 30.00           C
ATOM    765  C   TRP A 174     -10.382  29.877  -1.752  1.00 30.00           C
ATOM    766  O   TRP A 174     -10.795  29.083  -2.601  1.00 30.00           O
ATOM    767  CB  TRP A 174     -11.164  32.154  -1.621  1.00 30.00           C
ATOM    768  CG  TRP A 174     -11.390  33.594  -2.026  1.00110.00           C
ATOM    769  CD1 TRP A 174     -10.564  34.524  -2.620  1.00110.00           C
ATOM    770  CD2 TRP A 174     -12.634  34.289  -1.779  1.00110.00           C
ATOM    771  NE1 TRP A 174     -11.250  35.701  -2.796  1.00110.00           N
ATOM    772  CE3 TRP A 174     -13.849  33.924  -1.156  1.00110.00           C
ATOM    773  CE2 TRP A 174     -12.515  35.586  -2.276  1.00110.00           C
ATOM    774  CZ3 TRP A 174     -14.892  34.854  -1.069  1.00110.00           C
ATOM    775  CZ2 TRP A 174     -13.547  36.529  -2.200  1.00110.00           C
ATOM    776  CH2 TRP A 174     -14.741  36.137  -1.587  1.00110.00           C
ATOM    777  N   SER A 175     -10.269  29.570  -0.468  1.00 30.00           N
ATOM    778  CA  SER A 175     -10.639  28.257   0.017  1.00 30.00           C
ATOM    779  C   SER A 175     -11.195  28.377   1.417  1.00 30.00           C
ATOM    780  O   SER A 175     -10.715  29.188   2.201  1.00 30.00           O
ATOM    781  N   VAL A 176     -12.211  27.580   1.726  1.00 30.00           N
ATOM    782  CA  VAL A 176     -12.828  27.616   3.044  1.00 30.00           C
ATOM    783  C   VAL A 176     -13.005  26.202   3.566  1.00 30.00           C
ATOM    784  O   VAL A 176     -13.243  25.280   2.798  1.00 30.00           O
ATOM    785  N   GLY A 177     -12.895  26.037   4.877  1.00 30.00           N
ATOM    786  CA  GLY A 177     -13.059  24.715   5.445  1.00 30.00           C
ATOM    787  C   GLY A 177     -13.728  24.701   6.801  1.00 30.00           C
ATOM    788  O   GLY A 177     -13.685  25.682   7.543  1.00 30.00           O
ATOM    789  N   ALA A 178     -14.363  23.578   7.117  1.00 30.00           N
ATOM    790  CA  ALA A 178     -15.024  23.405   8.403  1.00 30.00           C
ATOM    791  C   ALA A 178     -14.818  21.967   8.869  1.00 30.00           C
ATOM    792  O   ALA A 178     -15.043  21.026   8.114  1.00 30.00           O
ATOM    793  N   ARG A 179     -14.382  21.798  10.110  1.00 30.00           N
ATOM    794  CA  ARG A 179     -14.182  20.461  10.650  1.00 30.00           C
ATOM    795  C   ARG A 179     -15.063  20.281  11.876  1.00 30.00           C
ATOM    796  O   ARG A 179     -15.015  21.089  12.811  1.00 30.00           O
ATOM    797  CB  ARG A 179     -12.727  20.287  11.053  1.00 30.00           C
ATOM    798  CG  ARG A 179     -11.833  20.367   9.824  1.00110.00           C
ATOM    799  CD  ARG A 179     -10.390  20.247  10.193  1.00110.00           C
ATOM    800  NE  ARG A 179      -9.452  20.561   9.118  1.00110.00           N
ATOM    801  CZ  ARG A 179      -8.345  21.322   9.209  1.00110.00           C
ATOM    802  NH1 ARG A 179      -7.915  21.798  10.368  1.00110.00           N
ATOM    803  NH2 ARG A 179      -7.640  21.569   8.110  1.00110.00           N1+
ATOM    804  N   ALA A 180     -15.868  19.224  11.859  1.00 30.00           N
ATOM    805  CA  ALA A 180     -16.765  18.927  12.960  1.00 30.00           C
ATOM    806  C   ALA A 180     -16.020  18.416  14.182  1.00 30.00           C
ATOM    807  O   ALA A 180     -15.174  17.528  14.081  1.00 30.00           O
ATOM    808  N   ALA A 181     -16.342  18.978  15.342  1.00 30.00           N
ATOM    809  CA  ALA A 181     -15.714  18.558  16.585  1.00 30.00           C
ATOM    810  C   ALA A 181     -16.327  17.240  17.043  1.00 30.00           C
ATOM    811  O   ALA A 181     -15.670  16.438  17.712  1.00 30.00           O
ATOM    812  N   LEU A 182     -17.592  17.029  16.677  1.00 30.00           N
ATOM    813  CA  LEU A 182     -18.333  15.820  17.037  1.00 30.00           C
ATOM    814  C   LEU A 182     -18.378  15.602  18.552  1.00 30.00           C
ATOM    815  O   LEU A 182     -18.376  14.470  19.049  1.00 30.00           O
ATOM    816  N   TRP A 183     -18.367  16.701  19.323  1.00110.00           N
ATOM    817  CA  TRP A 183     -18.449  16.756  20.781  1.00110.00           C
ATOM    818  C   TRP A 183     -17.468  15.757  21.440  1.00110.00           C
ATOM    819  O   TRP A 183     -17.705  15.279  22.550  1.00110.00           O
ATOM    820  CB  TRP A 183     -19.884  16.459  21.274  1.00110.00           C
ATOM    821  CG  TRP A 183     -20.921  17.369  20.674  1.00110.00           C
ATOM    822  CD1 TRP A 183     -21.224  18.652  21.084  1.00110.00           C
ATOM    823  CD2 TRP A 183     -21.776  17.077  19.562  1.00110.00           C
ATOM    824  NE1 TRP A 183     -22.206  19.152  20.267  1.00110.00           N
ATOM    825  CE3 TRP A 183     -21.952  15.953  18.728  1.00110.00           C
ATOM    826  CE2 TRP A 183     -22.554  18.211  19.324  1.00110.00           C
ATOM    827  CZ3 TRP A 183     -22.880  16.010  17.683  1.00110.00           C
ATOM    828  CZ2 TRP A 183     -23.494  18.280  18.289  1.00110.00           C
ATOM    829  CH2 TRP A 183     -23.640  17.157  17.469  1.00110.00           C
ATOM    830  N   GLU A 184     -16.375  15.440  20.734  1.00110.00           N
ATOM    831  CA  GLU A 184     -15.269  14.530  21.141  1.00110.00           C
ATOM    832  C   GLU A 184     -14.199  15.625  21.575  1.00110.00           C
ATOM    833  O   GLU A 184     -13.152  15.786  20.947  1.00110.00           O
ATOM    834  N   CYS A 185     -14.554  16.384  22.614  1.00110.00           N
ATOM    835  CA  CYS A 185     -13.752  17.470  23.170  1.00110.00           C
ATOM    836  C   CYS A 185     -13.717  18.671  22.203  1.00110.00           C
ATOM    837  O   CYS A 185     -14.764  19.221  21.860  1.00110.00           O
ATOM    838  CB  CYS A 185     -12.374  16.934  23.654  1.00110.00           C
ATOM    839  SG  CYS A 185     -12.474  15.418  24.694  1.00110.00           S
ATOM    840  N   GLY A 186     -12.510  19.081  21.794  1.00110.00           N
ATOM    841  CA  GLY A 186     -12.265  20.192  20.872  1.00110.00           C
ATOM    842  C   GLY A 186     -12.334  19.740  19.414  1.00110.00           C
ATOM    843  O   GLY A 186     -13.316  19.072  19.091  1.00110.00           O
ATOM    844  N   CYS A 187     -11.351  20.080  18.550  1.00 30.00           N
ATOM    845  CA  CYS A 187     -11.113  19.630  17.189  1.00 30.00           C
ATOM    846  C   CYS A 187     -11.819  20.437  16.121  1.00 30.00           C
ATOM    847  O   CYS A 187     -11.475  20.354  14.943  1.00 30.00           O
ATOM    848  CB  CYS A 187     -11.630  18.155  17.025  1.00 30.00           C
ATOM    849  SG  CYS A 187     -10.859  16.923  18.156  1.00110.00           S
ATOM    850  N   ALA A 188     -12.826  21.209  16.521  1.00 30.00           N
ATOM    851  CA  ALA A 188     -13.557  22.018  15.558  1.00 30.00           C
ATOM    852  C   ALA A 188     -12.631  23.009  14.881  1.00 30.00           C
ATOM    853  O   ALA A 188     -11.809  23.661  15.530  1.00 30.00           O
ATOM    854  N   THR A 189     -12.786  23.120  13.568  1.00 30.00           N
ATOM    855  CA  THR A 189     -11.993  24.036  12.772  1.00 30.00           C
ATOM    856  C   THR A 189     -12.891  24.884  11.887  1.00 30.00           C
ATOM    857  O   THR A 189     -13.858  24.391  11.306  1.00 30.00           O
ATOM    858  N   LEU A 190     -12.558  26.161  11.792  1.00 30.00           N
ATOM    859  CA  LEU A 190     -13.273  27.094  10.931  1.00 30.00           C
ATOM    860  C   LEU A 190     -12.184  28.010  10.385  1.00 30.00           C
ATOM    861  O   LEU A 190     -11.403  28.586  11.149  1.00 30.00           O
ATOM    862  N   GLY A 191     -12.099  28.118   9.065  1.00 30.00           N
ATOM    863  CA  GLY A 191     -11.072  28.965   8.489  1.00 30.00           C
ATOM    864  C   GLY A 191     -11.034  28.961   6.974  1.00 30.00           C
ATOM    865  O   GLY A 191     -11.764  28.219   6.317  1.00 30.00           O
ATOM    866  N   ALA A 192     -10.169  29.800   6.422  1.00 30.00           N
ATOM    867  CA  ALA A 192     -10.043  29.892   4.984  1.00 30.00           C
ATOM    868  C   ALA A 192      -8.986  30.905   4.598  1.00 30.00           C
ATOM    869  O   ALA A 192      -8.302  31.467   5.460  1.00 30.00           O
ATOM    870  N   SER A 193      -8.842  31.139   3.298  1.00 30.00           N
ATOM    871  CA  SER A 193      -7.856  32.092   2.825  1.00 30.00           C
ATOM    872  C   SER A 193      -8.292  32.756   1.530  1.00 30.00           C
ATOM    873  O   SER A 193      -9.165  32.264   0.821  1.00 30.00           O
ATOM    874  N   PHE A 194      -7.660  33.883   1.242  1.00 30.00           N
ATOM    875  CA  PHE A 194      -7.904  34.647   0.026  1.00 30.00           C
ATOM    876  C   PHE A 194      -6.512  34.886  -0.545  1.00 30.00           C
ATOM    877  O   PHE A 194      -5.598  35.273   0.179  1.00 30.00           O
ATOM    878  CB  PHE A 194      -8.578  36.006   0.303  1.00 30.00           C
ATOM    879  CG  PHE A 194      -9.500  36.034   1.506  1.00110.00           C
ATOM    880  CD1 PHE A 194     -10.781  35.473   1.445  1.00110.00           C
ATOM    881  CD2 PHE A 194      -9.059  36.581   2.721  1.00110.00           C
ATOM    882  CE1 PHE A 194     -11.606  35.460   2.571  1.00110.00           C
ATOM    883  CE2 PHE A 194      -9.883  36.567   3.847  1.00110.00           C
ATOM    884  CZ  PHE A 194     -11.157  36.007   3.772  1.00110.00           C
ATOM    885  N   GLN A 195      -6.337  34.642  -1.834  1.00 30.00           N
ATOM    886  CA  GLN A 195      -5.027  34.832  -2.427  1.00 30.00           C
ATOM    887  C   GLN A 195      -5.076  35.332  -3.858  1.00 30.00           C
ATOM    888  O   GLN A 195      -6.128  35.332  -4.500  1.00 30.00           O
ATOM    889  N   TYR A 196      -3.919  35.778  -4.332  1.00 30.00           N
ATOM    890  CA  TYR A 196      -3.762  36.251  -5.696  1.00 30.00           C
ATOM    891  C   TYR A 196      -2.553  35.511  -6.250  1.00 30.00           C
ATOM    892  O   TYR A 196      -1.439  35.648  -5.734  1.00 30.00           O
ATOM    893  CB  TYR A 196      -3.537  37.771  -5.696  1.00 30.00           C
ATOM    894  CG  TYR A 196      -3.321  38.405  -7.050  1.00 30.00           C
ATOM    895  CD1 TYR A 196      -4.409  38.883  -7.790  1.00 30.00           C
ATOM    896  CD2 TYR A 196      -2.026  38.552  -7.572  1.00 30.00           C
ATOM    897  CE1 TYR A 196      -4.206  39.513  -9.020  1.00 30.00           C
ATOM    898  CE2 TYR A 196      -1.823  39.170  -8.808  1.00 30.00           C
ATOM    899  CZ  TYR A 196      -2.917  39.646  -9.523  1.00 30.00           C
ATOM    900  OH  TYR A 196      -2.765  40.252 -10.737  1.00 30.00           O
ATOM    901  N   ALA A 197      -2.781  34.709  -7.283  1.00 30.00           N
ATOM    902  CA  ALA A 197      -1.708  33.955  -7.911  1.00 30.00           C
ATOM    903  C   ALA A 197      -1.717  34.196  -9.415  1.00 30.00           C
ATOM    904  O   ALA A 197      -2.646  33.789 -10.112  1.00 30.00           O
ATOM    905  N   GLN A 198      -0.679  34.857  -9.909  1.00 30.00           N
ATOM    906  CA  GLN A 198      -0.578  35.145 -11.335  1.00 30.00           C
ATOM    907  C   GLN A 198       0.879  35.337 -11.719  1.00 30.00           C
ATOM    908  O   GLN A 198       1.588  36.148 -11.120  1.00 30.00           O
ATOM    909  N   SER A 199       1.321  34.580 -12.715  1.00 30.00           N
ATOM    910  CA  SER A 199       2.691  34.687 -13.170  1.00 30.00           C
ATOM    911  C   SER A 199       3.708  34.506 -12.058  1.00 30.00           C
ATOM    912  O   SER A 199       3.654  33.517 -11.324  1.00 30.00           O
ATOM    913  N   LYS A 200       4.650  35.451 -11.905  1.00 30.00           N
ATOM    914  CA  LYS A 200       5.687  35.383 -10.871  1.00 30.00           C
ATOM    915  C   LYS A 200       5.249  35.834  -9.477  1.00 30.00           C
ATOM    916  O   LYS A 200       6.017  35.731  -8.522  1.00 30.00           O
ATOM    917  CB  LYS A 200       6.831  36.304 -11.356  1.00 30.00           C
ATOM    918  CG  LYS A 200       7.513  35.790 -12.637  1.00110.00           C
ATOM    919  CD  LYS A 200       8.288  36.908 -13.345  1.00110.00           C
ATOM    920  CE  LYS A 200       9.133  36.360 -14.488  1.00110.00           C
ATOM    921  NZ  LYS A 200       9.828  37.475 -15.162  1.00110.00           N1+
ATOM    922  N   PRO A 201       4.023  36.330  -9.360  1.00 30.00           N
ATOM    923  CA  PRO A 201       3.523  36.816  -8.082  1.00 30.00           C
ATOM    924  C   PRO A 201       2.518  35.897  -7.397  1.00 30.00           C
ATOM    925  O   PRO A 201       1.645  35.307  -8.036  1.00 30.00           O
ATOM    926  N   LYS A 202       2.645  35.795  -6.080  1.00 30.00           N
ATOM    927  CA  LYS A 202       1.747  34.973  -5.278  1.00 30.00           C
ATOM    928  C   LYS A 202       1.662  35.590  -3.896  1.00 30.00           C
ATOM    929  O   LYS A 202       2.680  35.833  -3.255  1.00 30.00           O
ATOM    930  CB  LYS A 202       2.251  33.517  -5.190  1.00 30.00           C
ATOM    931  CG  LYS A 202       1.210  32.546  -4.605  1.00110.00           C
ATOM    932  CD  LYS A 202       1.393  32.263  -3.106  1.00110.00           C
ATOM    933  CE  LYS A 202       0.182  31.523  -2.545  1.00110.00           C
ATOM    934  NZ  LYS A 202       0.404  31.160  -1.134  1.00110.00           N1+
ATOM    935  N   VAL A 203       0.444  35.858  -3.445  1.00 30.00           N
ATOM    936  CA  VAL A 203       0.229  36.451  -2.131  1.00 30.00           C
ATOM    937  C   VAL A 203      -1.026  35.846  -1.521  1.00 30.00           C
ATOM    938  O   VAL A 203      -2.022  35.651  -2.215  1.00 30.00           O
ATOM    939  N   GLU A 204      -0.974  35.554  -0.225  1.00 30.00           N
ATOM    940  CA  GLU A 204      -2.117  34.956   0.460  1.00 30.00           C
ATOM    941  C   GLU A 204      -2.302  35.449   1.888  1.00 30.00           C
ATOM    942  O   GLU A 204      -1.345  35.823   2.570  1.00 30.00           O
ATOM    943  N   GLU A 205      -3.555  35.439   2.324  1.00 30.00           N
ATOM    944  CA  GLU A 205      -3.916  35.818   3.679  1.00 30.00           C
ATOM    945  C   GLU A 205      -4.835  34.719   4.205  1.00 30.00           C
ATOM    946  O   GLU A 205      -5.883  34.442   3.613  1.00 30.00           O
ATOM    947  N   LEU A 206      -4.426  34.078   5.296  1.00 30.00           N
ATOM    948  CA  LEU A 206      -5.240  33.030   5.878  1.00 30.00           C
ATOM    949  C   LEU A 206      -5.642  33.324   7.314  1.00 30.00           C
ATOM    950  O   LEU A 206      -4.862  33.882   8.087  1.00 30.00           O
ATOM    951  N   ASN A 207      -6.871  32.960   7.663  1.00 30.00           N
ATOM    952  CA  ASN A 207      -7.394  33.156   9.013  1.00 30.00           C
ATOM    953  C   ASN A 207      -8.070  31.860   9.434  1.00 30.00           C
ATOM    954  O   ASN A 207      -8.826  31.263   8.662  1.00 30.00           O
ATOM    955  N   VAL A 208      -7.815  31.431  10.661  1.00 30.00           N
ATOM    956  CA  VAL A 208      -8.417  30.200  11.138  1.00 30.00           C
ATOM    957  C   VAL A 208      -8.541  30.160  12.649  1.00 30.00           C
ATOM    958  O   VAL A 208      -7.770  30.803  13.376  1.00 30.00           O
ATOM    959  N   LEU A 209      -9.533  29.410  13.114  1.00 30.00           N
ATOM    960  CA  LEU A 209      -9.737  29.224  14.541  1.00 30.00           C
ATOM    961  C   LEU A 209     -10.105  27.771  14.811  1.00 30.00           C
ATOM    962  O   LEU A 209     -10.956  27.189  14.125  1.00 30.00           O
ATOM    963  N   CYS A 210      -9.447  27.187  15.802  1.00 30.00           N
ATOM    964  CA  CYS A 210      -9.733  25.822  16.213  1.00 30.00           C
ATOM    965  C   CYS A 210     -10.142  25.867  17.676  1.00 30.00           C
ATOM    966  O   CYS A 210      -9.703  26.746  18.431  1.00 30.00           O
ATOM    967  CB  CYS A 210      -8.489  24.965  16.144  1.00 30.00           C
ATOM    968  SG  CYS A 210      -7.548  24.486  17.651  1.00110.00           S
ATOM    969  N   ASN A 211     -10.994  24.927  18.064  1.00 30.00           N
ATOM    970  CA  ASN A 211     -11.428  24.808  19.441  1.00 30.00           C
ATOM    971  C   ASN A 211     -10.536  23.736  20.047  1.00 30.00           C
ATOM    972  O   ASN A 211     -10.307  22.692  19.436  1.00 30.00           O
ATOM    973  N   ALA A 212     -10.007  23.996  21.232  1.00 30.00           N
ATOM    974  CA  ALA A 212      -9.161  23.014  21.878  1.00 30.00           C
ATOM    975  C   ALA A 212      -9.217  23.158  23.397  1.00 30.00           C
ATOM    976  O   ALA A 212     -10.154  23.746  23.947  1.00 30.00           O
ATOM    977  N   SER A 213      -8.307  22.470  24.096  1.00110.00           N
ATOM    978  CA  SER A 213      -8.146  22.474  25.541  1.00110.00           C
ATOM    979  C   SER A 213      -9.416  21.952  26.243  1.00110.00           C
ATOM    980  O   SER A 213      -9.591  22.215  27.427  1.00110.00           O
ATOM    981  N   GLU A 214     -10.282  21.238  25.504  1.00110.00           N
ATOM    982  CA  GLU A 214     -11.603  20.636  25.908  1.00110.00           C
ATOM    983  C   GLU A 214     -12.703  21.617  25.475  1.00110.00           C
ATOM    984  O   GLU A 214     -13.758  21.743  26.090  1.00110.00           O
ATOM    985  N   PHE A 215     -12.359  22.398  24.461  1.00110.00           N
ATOM    986  CA  PHE A 215     -13.017  23.607  23.961  1.00110.00           C
ATOM    987  C   PHE A 215     -12.860  24.763  24.973  1.00110.00           C
ATOM    988  O   PHE A 215     -13.517  25.796  24.871  1.00110.00           O
ATOM    989  CB  PHE A 215     -14.503  23.323  23.625  1.00110.00           C
ATOM    990  CG  PHE A 215     -15.367  24.313  22.864  1.00110.00           C
ATOM    991  CD1 PHE A 215     -14.913  25.520  22.322  1.00110.00           C
ATOM    992  CD2 PHE A 215     -16.731  23.995  22.716  1.00110.00           C
ATOM    993  CE1 PHE A 215     -15.800  26.401  21.694  1.00110.00           C
ATOM    994  CE2 PHE A 215     -17.613  24.866  22.072  1.00110.00           C
ATOM    995  CZ  PHE A 215     -17.147  26.074  21.566  1.00110.00           C
ATOM    996  N   ASP A 248     -11.932  24.604  25.917  1.00110.00           N
ATOM    997  CA  ASP A 248     -11.617  25.569  26.957  1.00110.00           C
ATOM    998  C   ASP A 248     -10.658  26.633  26.415  1.00110.00           C
ATOM    999  O   ASP A 248     -10.412  27.632  27.091  1.00110.00           O
ATOM   1000  N   TYR A 249     -10.097  26.454  25.201  1.00 30.00           N
ATOM   1001  CA  TYR A 249      -9.208  27.435  24.605  1.00 30.00           C
ATOM   1002  C   TYR A 249      -9.436  27.572  23.103  1.00 30.00           C
ATOM   1003  O   TYR A 249      -9.741  26.590  22.418  1.00 30.00           O
ATOM   1004  CB  TYR A 249      -7.729  27.081  24.877  1.00 30.00           C
ATOM   1005  CG  TYR A 249      -6.779  28.255  24.766  1.00110.00           C
ATOM   1006  CD1 TYR A 249      -6.870  29.328  25.666  1.00110.00           C
ATOM   1007  CD2 TYR A 249      -5.795  28.285  23.768  1.00110.00           C
ATOM   1008  CE1 TYR A 249      -6.023  30.429  25.545  1.00110.00           C
ATOM   1009  CE2 TYR A 249      -4.942  29.385  23.651  1.00110.00           C
ATOM   1010  CZ  TYR A 249      -5.073  30.454  24.532  1.00110.00           C
ATOM   1011  OH  TYR A 249      -4.283  31.562  24.429  1.00110.00           O
ATOM   1012  N   HIS A 250      -9.298  28.797  22.603  1.00 30.00           N
ATOM   1013  CA  HIS A 250      -9.433  29.064  21.175  1.00 30.00           C
ATOM   1014  C   HIS A 250      -8.028  29.201  20.606  1.00 30.00           C
ATOM   1015  O   HIS A 250      -7.186  29.892  21.182  1.00 30.00           O
ATOM   1016  CB  HIS A 250     -10.198  30.375  20.913  1.00 30.00           C
ATOM   1017  CG  HIS A 250     -11.673  30.212  21.101  1.00110.00           C
ATOM   1018  ND1 HIS A 250     -12.266  30.088  22.335  1.00110.00           N
ATOM   1019  CD2 HIS A 250     -12.712  30.141  20.199  1.00110.00           C
ATOM   1020  CE1 HIS A 250     -13.610  29.933  22.127  1.00110.00           C
ATOM   1021  NE2 HIS A 250     -13.910  29.963  20.846  1.00110.00           N
ATOM   1022  N   GLU A 251      -7.766  28.526  19.492  1.00 30.00           N
ATOM   1023  CA  GLU A 251      -6.470  28.636  18.836  1.00 30.00           C
ATOM   1024  C   GLU A 251      -6.736  29.526  17.621  1.00 30.00           C
ATOM   1025  O   GLU A 251      -7.317  29.075  16.632  1.00 30.00           O
ATOM   1026  N   TRP A 252      -6.348  30.796  17.720  1.00 30.00           N
ATOM   1027  CA  TRP A 252      -6.539  31.751  16.631  1.00 30.00           C
ATOM   1028  C   TRP A 252      -5.238  31.890  15.859  1.00 30.00           C
ATOM   1029  O   TRP A 252      -4.169  32.053  16.451  1.00 30.00           O
ATOM   1030  CB  TRP A 252      -6.951  33.119  17.202  1.00 30.00           C
ATOM   1031  CG  TRP A 252      -7.254  34.151  16.155  1.00110.00           C
ATOM   1032  CD1 TRP A 252      -8.398  34.229  15.385  1.00110.00           C
ATOM   1033  CD2 TRP A 252      -6.416  35.246  15.763  1.00110.00           C
ATOM   1034  NE1 TRP A 252      -8.294  35.316  14.556  1.00110.00           N
ATOM   1035  CE3 TRP A 252      -5.139  35.696  16.159  1.00110.00           C
ATOM   1036  CE2 TRP A 252      -7.101  35.966  14.784  1.00110.00           C
ATOM   1037  CZ3 TRP A 252      -4.602  36.851  15.577  1.00110.00           C
ATOM   1038  CZ2 TRP A 252      -6.584  37.129  14.201  1.00110.00           C
ATOM   1039  CH2 TRP A 252      -5.321  37.560  14.618  1.00110.00           C
ATOM   1040  N   GLN A 253      -5.336  31.832  14.538  1.00 30.00           N
ATOM   1041  CA  GLN A 253      -4.155  31.918  13.693  1.00 30.00           C
ATOM   1042  C   GLN A 253      -4.369  32.774  12.453  1.00 30.00           C
ATOM   1043  O   GLN A 253      -5.298  32.547  11.683  1.00 30.00           O
ATOM   1044  N   ALA A 254      -3.511  33.775  12.283  1.00 30.00           N
ATOM   1045  CA  ALA A 254      -3.567  34.647  11.115  1.00 30.00           C
ATOM   1046  C   ALA A 254      -2.216  34.492  10.422  1.00 30.00           C
ATOM   1047  O   ALA A 254      -1.168  34.548  11.066  1.00 30.00           O
ATOM   1048  N   SER A 255      -2.239  34.285   9.110  1.00 30.00           N
ATOM   1049  CA  SER A 255      -1.007  34.077   8.357  1.00 30.00           C
ATOM   1050  C   SER A 255      -0.985  34.846   7.034  1.00 30.00           C
ATOM   1051  O   SER A 255      -1.921  34.761   6.233  1.00 30.00           O
ATOM   1052  N   LEU A 256       0.086  35.595   6.806  1.00 30.00           N
ATOM   1053  CA  LEU A 256       0.224  36.341   5.567  1.00 30.00           C
ATOM   1054  C   LEU A 256       1.468  35.832   4.837  1.00 30.00           C
ATOM   1055  O   LEU A 256       2.545  35.718   5.423  1.00 30.00           O
ATOM   1056  N   ALA A 257       1.311  35.514   3.556  1.00 30.00           N
ATOM   1057  CA  ALA A 257       2.435  35.016   2.791  1.00 30.00           C
ATOM   1058  C   ALA A 257       2.500  35.606   1.399  1.00 30.00           C
ATOM   1059  O   ALA A 257       1.490  36.031   0.835  1.00 30.00           O
ATOM   1060  N   LEU A 258       3.703  35.629   0.841  1.00 30.00           N
ATOM   1061  CA  LEU A 258       3.921  36.154  -0.497  1.00 30.00           C
ATOM   1062  C   LEU A 258       5.275  35.702  -1.015  1.00 30.00           C
ATOM   1063  O   LEU A 258       6.192  35.418  -0.239  1.00 30.00           O
ATOM   1064  N   SER A 259       5.387  35.622  -2.336  1.00 30.00           N
ATOM   1065  CA  SER A 259       6.631  35.229  -2.968  1.00 30.00           C
ATOM   1066  C   SER A 259       6.682  35.852  -4.354  1.00 30.00           C
ATOM   1067  O   SER A 259       5.640  36.125  -4.968  1.00 30.00           O
ATOM   1068  N   TYR A 260       7.898  36.093  -4.837  1.00 30.00           N
ATOM   1069  CA  TYR A 260       8.087  36.672  -6.159  1.00 30.00           C
ATOM   1070  C   TYR A 260       9.230  35.937  -6.848  1.00 30.00           C
ATOM   1071  O   TYR A 260      10.322  35.812  -6.292  1.00 30.00           O
ATOM   1072  CB  TYR A 260       8.408  38.183  -6.079  1.00 30.00           C
ATOM   1073  CG  TYR A 260       7.823  38.970  -7.238  1.00 30.00           C
ATOM   1074  CD1 TYR A 260       8.400  38.910  -8.515  1.00 30.00           C
ATOM   1075  CD2 TYR A 260       6.681  39.762  -7.047  1.00 30.00           C
ATOM   1076  CE1 TYR A 260       7.842  39.618  -9.580  1.00 30.00           C
ATOM   1077  CE2 TYR A 260       6.129  40.481  -8.111  1.00 30.00           C
ATOM   1078  CZ  TYR A 260       6.711  40.397  -9.372  1.00 30.00           C
ATOM   1079  OH  TYR A 260       6.190  41.067 -10.441  1.00 30.00           O
ATOM   1080  N   ARG A 261       8.969  35.446  -8.053  1.00 30.00           N
ATOM   1081  CA  ARG A 261       9.975  34.728  -8.816  1.00 30.00           C
ATOM   1082  C   ARG A 261      10.627  35.689  -9.815  1.00 30.00           C
ATOM   1083  O   ARG A 261       9.996  36.081 -10.799  1.00 30.00           O
ATOM   1084  CB  ARG A 261       9.307  33.544  -9.546  1.00 30.00           C
ATOM   1085  CG  ARG A 261       8.610  32.584  -8.571  1.00110.00           C
ATOM   1086  CD  ARG A 261       8.071  31.343  -9.269  1.00110.00           C
ATOM   1087  NE  ARG A 261       7.489  30.398  -8.303  1.00110.00           N
ATOM   1088  CZ  ARG A 261       6.300  30.516  -7.690  1.00110.00           C
ATOM   1089  NH1 ARG A 261       5.474  31.535  -7.938  1.00110.00           N
ATOM   1090  NH2 ARG A 261       5.923  29.591  -6.803  1.00110.00           N1+
ATOM   1091  N   LEU A 262      11.874  36.079  -9.554  1.00 30.00           N
ATOM   1092  CA  LEU A 262      12.597  36.982 -10.453  1.00 30.00           C
ATOM   1093  C   LEU A 262      13.376  36.200 -11.508  1.00 30.00           C
ATOM   1094  O   LEU A 262      14.220  36.765 -12.204  1.00 30.00           O
ATOM   1095  N   ASN A 263      13.114  34.901 -11.610  1.00 30.00           N
ATOM   1096  CA  ASN A 263      13.818  34.093 -12.591  1.00 30.00           C
ATOM   1097  C   ASN A 263      15.186  33.638 -12.120  1.00 30.00           C
ATOM   1098  O   ASN A 263      15.428  32.442 -11.957  1.00 30.00           O
ATOM   1099  N   MET A 264      16.091  34.590 -11.911  1.00 30.00           N
ATOM   1100  CA  MET A 264      17.442  34.273 -11.450  1.00 30.00           C
ATOM   1101  C   MET A 264      17.405  33.832  -9.988  1.00 30.00           C
ATOM   1102  O   MET A 264      18.310  33.153  -9.499  1.00 30.00           O
ATOM   1103  N   PHE A 265      16.345  34.232  -9.295  1.00 30.00           N
ATOM   1104  CA  PHE A 265      16.161  33.885  -7.896  1.00 30.00           C
ATOM   1105  C   PHE A 265      14.693  34.090  -7.542  1.00 30.00           C
ATOM   1106  O   PHE A 265      13.955  34.771  -8.265  1.00 30.00           O
ATOM   1107  CB  PHE A 265      16.914  34.839  -6.925  1.00 30.00           C
ATOM   1108  CG  PHE A 265      18.406  35.011  -7.082  1.00110.00           C
ATOM   1109  CD1 PHE A 265      19.293  34.049  -6.586  1.00110.00           C
ATOM   1110  CD2 PHE A 265      18.928  36.161  -7.694  1.00110.00           C
ATOM   1111  CE1 PHE A 265      20.673  34.225  -6.705  1.00110.00           C
ATOM   1112  CE2 PHE A 265      20.308  36.340  -7.807  1.00110.00           C
ATOM   1113  CZ  PHE A 265      21.180  35.371  -7.315  1.00110.00           C
ATOM   1114  N   THR A 266      14.276  33.487  -6.433  1.00 30.00           N
ATOM   1115  CA  THR A 266      12.905  33.612  -5.967  1.00 30.00           C
ATOM   1116  C   THR A 266      12.922  34.080  -4.513  1.00 30.00           C
ATOM   1117  O   THR A 266      13.723  33.608  -3.708  1.00 30.00           O
ATOM   1118  N   PRO A 267      12.039  35.015  -4.189  1.00 30.00           N
ATOM   1119  CA  PRO A 267      11.960  35.550  -2.839  1.00 30.00           C
ATOM   1120  C   PRO A 267      10.645  35.081  -2.225  1.00 30.00           C
ATOM   1121  O   PRO A 267       9.600  35.123  -2.875  1.00 30.00           O
ATOM   1122  N   TYR A 268      10.694  34.628  -0.979  1.00 30.00           N
ATOM   1123  CA  TYR A 268       9.483  34.158  -0.322  1.00 30.00           C
ATOM   1124  C   TYR A 268       9.486  34.501   1.159  1.00 30.00           C
ATOM   1125  O   TYR A 268      10.531  34.487   1.809  1.00 30.00           O
ATOM   1126  CB  TYR A 268       9.264  32.617  -0.317  1.00 30.00           C
ATOM   1127  CG  TYR A 268       9.518  31.749  -1.525  1.00110.00           C
ATOM   1128  CD1 TYR A 268      10.822  31.532  -1.981  1.00110.00           C
ATOM   1129  CD2 TYR A 268       8.481  30.982  -2.082  1.00110.00           C
ATOM   1130  CE1 TYR A 268      11.084  30.554  -2.940  1.00110.00           C
ATOM   1131  CE2 TYR A 268       8.734  30.049  -3.089  1.00110.00           C
ATOM   1132  CZ  TYR A 268      10.038  29.838  -3.509  1.00110.00           C
ATOM   1133  OH  TYR A 268      10.264  28.903  -4.477  1.00110.00           O
ATOM   1134  N   ILE A 269       8.309  34.811   1.690  1.00 30.00           N
ATOM   1135  CA  ILE A 269       8.212  35.147   3.095  1.00 30.00           C
ATOM   1136  C   ILE A 269       6.900  34.729   3.727  1.00 30.00           C
ATOM   1137  O   ILE A 269       5.907  34.500   3.039  1.00 30.00           O
ATOM   1138  N   GLY A 270       6.908  34.630   5.050  1.00 30.00           N
ATOM   1139  CA  GLY A 270       5.732  34.257   5.819  1.00 30.00           C
ATOM   1140  C   GLY A 270       5.665  35.069   7.106  1.00 30.00           C
ATOM   1141  O   GLY A 270       6.676  35.280   7.774  1.00 30.00           O
ATOM   1142  N   VAL A 271       4.460  35.526   7.430  1.00 30.00           N
ATOM   1143  CA  VAL A 271       4.180  36.292   8.640  1.00 30.00           C
ATOM   1144  C   VAL A 271       3.029  35.573   9.320  1.00 30.00           C
ATOM   1145  O   VAL A 271       1.984  35.351   8.708  1.00 30.00           O
ATOM   1146  N   LYS A 272       3.209  35.205  10.579  1.00 30.00           N
ATOM   1147  CA  LYS A 272       2.150  34.500  11.274  1.00 30.00           C
ATOM   1148  C   LYS A 272       2.061  34.812  12.759  1.00 30.00           C
ATOM   1149  O   LYS A 272       3.063  35.036  13.437  1.00 30.00           O
ATOM   1150  CB  LYS A 272       2.297  32.969  11.126  1.00 30.00           C
ATOM   1151  CG  LYS A 272       1.005  32.191  11.421  1.00110.00           C
ATOM   1152  CD  LYS A 272       1.135  30.719  11.042  1.00110.00           C
ATOM   1153  CE  LYS A 272      -0.214  30.027  10.962  1.00110.00           C
ATOM   1154  NZ  LYS A 272      -0.039  28.657  10.447  1.00110.00           N1+
ATOM   1155  N   TRP A 273       0.834  34.839  13.250  1.00 30.00           N
ATOM   1156  CA  TRP A 273       0.588  35.078  14.652  1.00 30.00           C
ATOM   1157  C   TRP A 273      -0.373  33.995  15.127  1.00 30.00           C
ATOM   1158  O   TRP A 273      -1.487  33.876  14.625  1.00 30.00           O
ATOM   1159  CB  TRP A 273      -0.106  36.436  14.885  1.00 30.00           C
ATOM   1160  CG  TRP A 273       0.671  37.636  14.421  1.00110.00           C
ATOM   1161  CD1 TRP A 273       1.560  38.380  15.170  1.00110.00           C
ATOM   1162  CD2 TRP A 273       0.587  38.269  13.137  1.00110.00           C
ATOM   1163  NE1 TRP A 273       2.018  39.421  14.404  1.00110.00           N
ATOM   1164  CE3 TRP A 273      -0.138  38.004  11.956  1.00110.00           C
ATOM   1165  CE2 TRP A 273       1.420  39.388  13.165  1.00110.00           C
ATOM   1166  CZ3 TRP A 273      -0.019  38.865  10.859  1.00110.00           C
ATOM   1167  CZ2 TRP A 273       1.548  40.263  12.079  1.00110.00           C
ATOM   1168  CH2 TRP A 273       0.807  39.983  10.926  1.00110.00           C
ATOM   1169  N   SER A 274       0.139  33.269  16.118  1.00110.00           N
ATOM   1170  CA  SER A 274      -0.459  32.360  17.088  1.00110.00           C
ATOM   1171  C   SER A 274       0.642  32.048  18.110  1.00110.00           C
ATOM   1172  O   SER A 274       1.757  31.727  17.699  1.00110.00           O
ATOM   1173  N   ARG A 275       0.334  32.203  19.402  1.00110.00           N
ATOM   1174  CA  ARG A 275       1.347  32.216  20.520  1.00110.00           C
ATOM   1175  C   ARG A 275       1.820  33.761  20.419  1.00110.00           C
ATOM   1176  O   ARG A 275       0.943  34.620  20.495  1.00110.00           O
ATOM   1177  CB  ARG A 275       2.453  31.173  20.440  1.00110.00           C
ATOM   1178  CG  ARG A 275       3.401  31.110  21.650  1.00110.00           C
ATOM   1179  CD  ARG A 275       2.778  30.631  22.958  1.00110.00           C
ATOM   1180  NE  ARG A 275       3.842  30.395  23.952  1.00110.00           N
ATOM   1181  CZ  ARG A 275       3.683  29.749  25.118  1.00110.00           C
ATOM   1182  NH1 ARG A 275       2.497  29.288  25.507  1.00110.00           N
ATOM   1183  NH2 ARG A 275       4.737  29.563  25.918  1.00110.00           N1+
ATOM   1184  N   ALA A 320       3.108  34.058  20.234  1.00110.00           N
ATOM   1185  CA  ALA A 320       3.581  35.427  20.034  1.00110.00           C
ATOM   1186  C   ALA A 320       3.464  35.789  18.540  1.00110.00           C
ATOM   1187  O   ALA A 320       2.578  36.548  18.152  1.00110.00           O
ATOM   1188  N   ASP A 321       4.349  35.223  17.716  1.00110.00           N
ATOM   1189  CA  ASP A 321       4.448  35.421  16.268  1.00110.00           C
ATOM   1190  C   ASP A 321       5.445  34.386  15.692  1.00110.00           C
ATOM   1191  O   ASP A 321       5.998  33.628  16.489  1.00110.00           O
ATOM   1192  N   THR A 322       5.662  34.366  14.358  1.00 30.00           N
ATOM   1193  CA  THR A 322       6.706  33.739  13.569  1.00 30.00           C
ATOM   1194  C   THR A 322       6.942  34.529  12.291  1.00 30.00           C
ATOM   1195  O   THR A 322       5.993  34.927  11.616  1.00 30.00           O
ATOM   1196  N   MET A 323       8.237  34.839  12.012  1.00 30.00           N
ATOM   1197  CA  MET A 323       8.686  35.604  10.851  1.00 30.00           C
ATOM   1198  C   MET A 323       9.491  34.611  10.004  1.00 30.00           C
ATOM   1199  O   MET A 323      10.228  33.766  10.530  1.00 30.00           O
ATOM   1200  N   GLN A 324       9.397  34.719   8.671  1.00110.00           N
ATOM   1201  CA  GLN A 324      10.212  33.955   7.737  1.00110.00           C
ATOM   1202  C   GLN A 324      10.790  34.880   6.655  1.00110.00           C
ATOM   1203  O   GLN A 324      10.053  35.677   6.074  1.00110.00           O
ATOM   1204  N   ILE A 325      12.098  34.760   6.400  1.00110.00           N
ATOM   1205  CA  ILE A 325      12.846  35.537   5.404  1.00110.00           C
ATOM   1206  C   ILE A 325      13.616  34.556   4.500  1.00110.00           C
ATOM   1207  O   ILE A 325      14.685  34.083   4.889  1.00110.00           O
ATOM   1208  N   VAL A 326      13.068  34.266   3.317  1.00110.00           N
ATOM   1209  CA  VAL A 326      13.711  33.352   2.401  1.00110.00           C
ATOM   1210  C   VAL A 326      14.614  33.874   1.249  1.00110.00           C
ATOM   1211  O   VAL A 326      14.335  34.923   0.666  1.00110.00           O
ATOM   1212  N   SER A 327      15.591  33.062   0.849  1.00110.00           N
ATOM   1213  CA  SER A 327      16.400  33.199  -0.351  1.00110.00           C
ATOM   1214  C   SER A 327      16.607  31.823  -1.018  1.00110.00           C
ATOM   1215  O   SER A 327      15.998  30.834  -0.609  1.00110.00           O
ATOM   1216  N   LEU A 328      17.431  31.767  -2.068  1.00110.00           N
ATOM   1217  CA  LEU A 328      17.741  30.536  -2.788  1.00110.00           C
ATOM   1218  C   LEU A 328      18.453  29.585  -1.839  1.00110.00           C
ATOM   1219  O   LEU A 328      19.616  29.813  -1.498  1.00110.00           O
ATOM   1220  N   GLN A 329      17.704  28.558  -1.434  1.00110.00           N
ATOM   1221  CA  GLN A 329      18.109  27.502  -0.524  1.00110.00           C
ATOM   1222  C   GLN A 329      18.664  28.081   0.778  1.00110.00           C
ATOM   1223  O   GLN A 329      19.519  27.484   1.434  1.00110.00           O
ATOM   1224  N   LEU A 330      18.213  29.284   1.132  1.00 30.00           N
ATOM   1225  CA  LEU A 330      18.626  30.071   2.286  1.00 30.00           C
ATOM   1226  C   LEU A 330      17.295  30.434   2.949  1.00 30.00           C
ATOM   1227  O   LEU A 330      16.386  30.807   2.208  1.00 30.00           O
ATOM   1228  N   ASN A 331      17.183  30.314   4.261  1.00 30.00           N
ATOM   1229  CA  ASN A 331      15.934  30.649   4.916  1.00 30.00           C
ATOM   1230  C   ASN A 331      16.232  31.166   6.319  1.00 30.00           C
ATOM   1231  O   ASN A 331      17.299  30.935   6.888  1.00 30.00           O
ATOM   1232  N   LYS A 332      15.201  31.793   6.863  1.00 30.00           N
ATOM   1233  CA  LYS A 332      15.263  32.304   8.206  1.00 30.00           C
ATOM   1234  C   LYS A 332      13.887  32.060   8.811  1.00 30.00           C
ATOM   1235  O   LYS A 332      12.896  32.344   8.153  1.00 30.00           O
ATOM   1236  CB  LYS A 332      15.626  33.790   8.260  1.00 30.00           C
ATOM   1237  CG  LYS A 332      16.079  34.224   9.661  1.00110.00           C
ATOM   1238  CD  LYS A 332      16.416  35.716   9.700  1.00110.00           C
ATOM   1239  CE  LYS A 332      16.907  36.142  11.078  1.00110.00           C
ATOM   1240  NZ  LYS A 332      17.221  37.585  11.061  1.00110.00           N1+
ATOM   1241  N   MET A 333      13.849  31.522  10.020  1.00 30.00           N
ATOM   1242  CA  MET A 333      12.621  31.247  10.712  1.00 30.00           C
ATOM   1243  C   MET A 333      12.721  31.648  12.183  1.00 30.00           C
ATOM   1244  O   MET A 333      13.723  31.386  12.841  1.00 30.00           O
ATOM   1245  N   LYS A 334      11.731  32.374  12.647  1.00 10.00           N
ATOM   1246  CA  LYS A 334      11.662  32.772  14.020  1.00 10.00           C
ATOM   1247  C   LYS A 334      10.236  32.556  14.488  1.00 10.00           C
ATOM   1248  O   LYS A 334       9.328  32.452  13.669  1.00 10.00           O
ATOM   1249  CB  LYS A 334      12.104  34.245  14.110  1.00 10.00           C
ATOM   1250  CG  LYS A 334      12.270  34.791  15.529  1.00 10.00           C
ATOM   1251  CD  LYS A 334      12.962  36.159  15.520  1.00 10.00           C
ATOM   1252  CE  LYS A 334      13.107  36.719  16.930  1.00 10.00           C
ATOM   1253  NZ  LYS A 334      13.774  38.034  16.868  1.00 10.00           N1+
ATOM   1254  N   SER A 335      10.062  32.481  15.796  1.00110.00           N
ATOM   1255  CA  SER A 335       8.823  32.437  16.504  1.00110.00           C
ATOM   1256  C   SER A 335       9.475  32.700  17.854  1.00110.00           C
ATOM   1257  O   SER A 335      10.586  33.229  17.903  1.00110.00           O
ATOM   1258  N   ARG A 336       8.810  32.312  18.937  1.00110.00           N
ATOM   1259  CA  ARG A 336       9.370  32.420  20.273  1.00110.00           C
ATOM   1260  C   ARG A 336       9.763  31.023  20.790  1.00110.00           C
ATOM   1261  O   ARG A 336      10.145  30.870  21.949  1.00110.00           O
ATOM   1262  CB  ARG A 336       8.302  33.058  21.187  1.00110.00           C
ATOM   1263  CG  ARG A 336       8.886  33.712  22.444  1.00110.00           C
ATOM   1264  CD  ARG A 336       7.820  34.480  23.223  1.00110.00           C
ATOM   1265  NE  ARG A 336       8.401  35.112  24.416  1.00110.00           N
ATOM   1266  CZ  ARG A 336       7.739  35.938  25.245  1.00110.00           C
ATOM   1267  NH1 ARG A 336       6.451  36.236  25.061  1.00110.00           N
ATOM   1268  NH2 ARG A 336       8.379  36.481  26.285  1.00110.00           N1+
ATOM   1269  N   LYS A 337       9.691  30.006  19.926  1.00110.00           N
ATOM   1270  CA  LYS A 337      10.071  28.636  20.248  1.00110.00           C
ATOM   1271  C   LYS A 337      10.975  28.093  19.156  1.00110.00           C
ATOM   1272  O   LYS A 337      11.487  26.976  19.238  1.00110.00           O
ATOM   1273  CB  LYS A 337       8.794  27.784  20.378  1.00110.00           C
ATOM   1274  CG  LYS A 337       9.007  26.483  21.166  1.00110.00           C
ATOM   1275  CD  LYS A 337       7.694  25.709  21.331  1.00110.00           C
ATOM   1276  CE  LYS A 337       7.896  24.417  22.112  1.00110.00           C
ATOM   1277  NZ  LYS A 337       6.600  23.724  22.254  1.00110.00           N1+
ATOM   1278  N   SER A 338      11.181  28.878  18.099  1.00 30.00           N
ATOM   1279  CA  SER A 338      11.952  28.509  16.907  1.00 30.00           C
ATOM   1280  C   SER A 338      12.818  29.690  16.486  1.00 30.00           C
ATOM   1281  O   SER A 338      12.317  30.821  16.475  1.00 30.00           O
ATOM   1282  N   CYS A 339      14.061  29.443  16.093  1.00 30.00           N
ATOM   1283  CA  CYS A 339      14.904  30.583  15.700  1.00 30.00           C
ATOM   1284  C   CYS A 339      16.197  30.082  15.077  1.00 30.00           C
ATOM   1285  O   CYS A 339      17.153  29.674  15.746  1.00 30.00           O
ATOM   1286  CB  CYS A 339      15.273  31.457  16.931  1.00 30.00           C
ATOM   1287  SG  CYS A 339      16.041  33.064  16.485  1.00110.00           S
ATOM   1288  N   GLY A 340      16.212  30.103  13.744  1.00 30.00           N
ATOM   1289  CA  GLY A 340      17.374  29.628  13.020  1.00 30.00           C
ATOM   1290  C   GLY A 340      17.531  30.266  11.649  1.00 30.00           C
ATOM   1291  O   GLY A 340      16.679  30.930  11.068  1.00 30.00           O
ATOM   1292  N   ILE A 341      18.684  29.929  11.090  1.00 30.00           N
ATOM   1293  CA  ILE A 341      19.077  30.305   9.755  1.00 30.00           C
ATOM   1294  C   ILE A 341      19.231  28.951   9.064  1.00 30.00           C
ATOM   1295  O   ILE A 341      19.588  28.014   9.789  1.00 30.00           O
ATOM   1296  N   ALA A 342      18.825  28.875   7.811  1.00 30.00           N
ATOM   1297  CA  ALA A 342      18.962  27.590   7.124  1.00 30.00           C
ATOM   1298  C   ALA A 342      19.784  27.845   5.873  1.00 30.00           C
ATOM   1299  O   ALA A 342      19.687  28.892   5.242  1.00 30.00           O
ATOM   1300  N   VAL A 343      20.588  26.861   5.532  1.00 30.00           N
ATOM   1301  CA  VAL A 343      21.377  26.879   4.319  1.00 30.00           C
ATOM   1302  C   VAL A 343      21.258  25.440   3.814  1.00 30.00           C
ATOM   1303  O   VAL A 343      21.459  24.487   4.571  1.00 30.00           O
ATOM   1304  N   GLY A 344      20.976  25.282   2.531  1.00 30.00           N
ATOM   1305  CA  GLY A 344      20.839  23.920   2.046  1.00 30.00           C
ATOM   1306  C   GLY A 344      20.858  23.895   0.544  1.00 30.00           C
ATOM   1307  O   GLY A 344      20.973  24.914  -0.106  1.00 30.00           O
ATOM   1308  N   THR A 345      20.806  22.661   0.062  1.00 30.00           N
ATOM   1309  CA  THR A 345      20.747  22.484  -1.379  1.00 30.00           C
ATOM   1310  C   THR A 345      20.091  21.138  -1.680  1.00 30.00           C
ATOM   1311  O   THR A 345      20.253  20.149  -0.973  1.00 30.00           O
ATOM   1312  N   THR A 346      19.385  21.174  -2.799  1.00 30.00           N
ATOM   1313  CA  THR A 346      18.843  19.937  -3.341  1.00 30.00           C
ATOM   1314  C   THR A 346      19.483  19.765  -4.713  1.00 30.00           C
ATOM   1315  O   THR A 346      19.606  20.763  -5.427  1.00 30.00           O
ATOM   1316  N   ILE A 347      19.848  18.544  -5.041  1.00 30.00           N
ATOM   1317  CA  ILE A 347      20.315  18.241  -6.382  1.00 30.00           C
ATOM   1318  C   ILE A 347      19.332  17.244  -6.990  1.00 30.00           C
ATOM   1319  O   ILE A 347      19.152  16.109  -6.540  1.00 30.00           O
ATOM   1320  N   VAL A 348      18.728  17.692  -8.078  1.00 30.00           N
ATOM   1321  CA  VAL A 348      17.733  16.949  -8.819  1.00 30.00           C
ATOM   1322  C   VAL A 348      18.370  16.237  -9.998  1.00 30.00           C
ATOM   1323  O   VAL A 348      18.652  16.911 -10.982  1.00 30.00           O
ATOM   1324  N   ASP A 349      18.564  14.929  -9.901  1.00 30.00           N
ATOM   1325  CA  ASP A 349      19.114  14.191 -11.030  1.00 30.00           C
ATOM   1326  C   ASP A 349      18.099  14.207 -12.166  1.00 30.00           C
ATOM   1327  O   ASP A 349      18.476  14.263 -13.321  1.00 30.00           O
ATOM   1328  N   ALA A 350      16.824  14.095 -11.852  1.00 30.00           N
ATOM   1329  CA  ALA A 350      15.696  14.137 -12.762  1.00 30.00           C
ATOM   1330  C   ALA A 350      14.451  14.262 -11.876  1.00 30.00           C
ATOM   1331  O   ALA A 350      14.579  14.534 -10.670  1.00 30.00           O
ATOM   1332  N   ASP A 351      13.279  13.932 -12.365  1.00 30.00           N
ATOM   1333  CA  ASP A 351      12.025  14.043 -11.630  1.00 30.00           C
ATOM   1334  C   ASP A 351      11.815  12.935 -10.608  1.00 30.00           C
ATOM   1335  O   ASP A 351      11.003  13.035  -9.699  1.00 30.00           O
ATOM   1336  N   LYS A 352      12.570  11.852 -10.740  1.00 30.00           N
ATOM   1337  CA  LYS A 352      12.448  10.709  -9.867  1.00 30.00           C
ATOM   1338  C   LYS A 352      13.529  10.622  -8.807  1.00 30.00           C
ATOM   1339  O   LYS A 352      13.369   9.855  -7.853  1.00 30.00           O
ATOM   1340  CB  LYS A 352      12.220   9.638 -10.936  1.00 30.00           C
ATOM   1341  CG  LYS A 352      11.334   9.909 -12.176  1.00110.00           C
ATOM   1342  CD  LYS A 352       9.823   9.681 -12.018  1.00110.00           C
ATOM   1343  CE  LYS A 352       9.100  10.702 -11.153  1.00110.00           C
ATOM   1344  NZ  LYS A 352       7.647  10.639 -11.425  1.00110.00           N1+
ATOM   1345  N   TYR A 353      14.654  11.300  -9.046  1.00 30.00           N
ATOM   1346  CA  TYR A 353      15.757  11.095  -8.107  1.00 30.00           C
ATOM   1347  C   TYR A 353      16.357  12.421  -7.674  1.00 30.00           C
ATOM   1348  O   TYR A 353      16.668  13.273  -8.497  1.00 30.00           O
ATOM   1349  CB  TYR A 353      16.962  10.413  -8.698  1.00 30.00           C
ATOM   1350  CG  TYR A 353      16.703   8.964  -8.682  1.00110.00           C
ATOM   1351  CD1 TYR A 353      16.357   8.291  -7.502  1.00110.00           C
ATOM   1352  CD2 TYR A 353      16.874   8.283  -9.865  1.00110.00           C
ATOM   1353  CE1 TYR A 353      16.011   6.960  -7.554  1.00110.00           C
ATOM   1354  CE2 TYR A 353      16.634   6.932  -9.858  1.00110.00           C
ATOM   1355  CZ  TYR A 353      16.061   6.317  -8.762  1.00110.00           C
ATOM   1356  OH  TYR A 353      15.537   5.074  -8.869  1.00110.00           O
ATOM   1357  N   ALA A 354      16.635  12.488  -6.375  1.00 30.00           N
ATOM   1358  CA  ALA A 354      17.324  13.673  -5.887  1.00 30.00           C
ATOM   1359  C   ALA A 354      18.108  13.340  -4.632  1.00 30.00           C
ATOM   1360  O   ALA A 354      18.096  12.223  -4.122  1.00 30.00           O
ATOM   1361  N   VAL A 355      18.927  14.292  -4.216  1.00 30.00           N
ATOM   1362  CA  VAL A 355      19.666  14.175  -2.967  1.00 30.00           C
ATOM   1363  C   VAL A 355      19.708  15.594  -2.403  1.00 30.00           C
ATOM   1364  O   VAL A 355      19.674  16.527  -3.203  1.00 30.00           O
ATOM   1365  N   THR A 356      19.825  15.741  -1.092  1.00 30.00           N
ATOM   1366  CA  THR A 356      19.884  17.044  -0.493  1.00 30.00           C
ATOM   1367  C   THR A 356      20.697  17.003   0.803  1.00 30.00           C
ATOM   1368  O   THR A 356      20.958  15.952   1.384  1.00 30.00           O
ATOM   1369  N   VAL A 357      21.095  18.204   1.199  1.00 30.00           N
ATOM   1370  CA  VAL A 357      21.760  18.456   2.459  1.00 30.00           C
ATOM   1371  C   VAL A 357      21.003  19.650   3.038  1.00 30.00           C
ATOM   1372  O   VAL A 357      20.751  20.604   2.313  1.00 30.00           O
ATOM   1373  N   GLU A 358      20.564  19.569   4.274  1.00 30.00           N
ATOM   1374  CA  GLU A 358      19.839  20.689   4.859  1.00 30.00           C
ATOM   1375  C   GLU A 358      20.503  21.007   6.188  1.00 30.00           C
ATOM   1376  O   GLU A 358      20.635  20.094   6.993  1.00 30.00           O
ATOM   1377  N   ALA A 359      20.913  22.251   6.379  1.00 30.00           N
ATOM   1378  CA  ALA A 359      21.647  22.592   7.597  1.00 30.00           C
ATOM   1379  C   ALA A 359      20.978  23.710   8.375  1.00 30.00           C
ATOM   1380  O   ALA A 359      20.720  24.806   7.859  1.00 30.00           O
ATOM   1381  N   ARG A 360      20.696  23.465   9.642  1.00 30.00           N
ATOM   1382  CA  ARG A 360      20.084  24.396  10.556  1.00 30.00           C
ATOM   1383  C   ARG A 360      21.117  24.986  11.526  1.00 30.00           C
ATOM   1384  O   ARG A 360      21.740  24.319  12.351  1.00 30.00           O
ATOM   1385  CB  ARG A 360      18.822  23.802  11.193  1.00 30.00           C
ATOM   1386  CG  ARG A 360      18.966  22.821  12.331  1.00110.00           C
ATOM   1387  CD  ARG A 360      17.601  22.401  12.867  1.00110.00           C
ATOM   1388  NE  ARG A 360      17.713  21.806  14.196  1.00110.00           N
ATOM   1389  CZ  ARG A 360      16.763  21.030  14.749  1.00110.00           C
ATOM   1390  NH1 ARG A 360      15.577  20.840  14.165  1.00110.00           N
ATOM   1391  NH2 ARG A 360      17.006  20.429  15.917  1.00110.00           N1+
ATOM   1392  N   LEU A 361      21.359  26.268  11.338  1.00 30.00           N
ATOM   1393  CA  LEU A 361      22.212  27.091  12.201  1.00 30.00           C
ATOM   1394  C   LEU A 361      21.262  27.653  13.244  1.00 30.00           C
ATOM   1395  O   LEU A 361      20.635  28.683  13.068  1.00 30.00           O
ATOM   1396  N   ILE A 362      21.006  26.952  14.347  1.00110.00           N
ATOM   1397  CA  ILE A 362      20.026  27.355  15.364  1.00110.00           C
ATOM   1398  C   ILE A 362      20.690  27.177  16.741  1.00110.00           C
ATOM   1399  O   ILE A 362      21.929  27.064  16.837  1.00110.00           O
ATOM   1400  N   ASP A 363      19.872  27.110  17.796  1.00110.00           N
ATOM   1401  CA  ASP A 363      20.296  26.929  19.175  1.00110.00           C
ATOM   1402  C   ASP A 363      20.581  25.462  19.333  1.00110.00           C
ATOM   1403  O   ASP A 363      21.147  25.031  20.350  1.00110.00           O
ATOM   1404  N   GLU A 364      20.141  24.672  18.311  1.00110.00           N
ATOM   1405  CA  GLU A 364      20.190  23.234  18.116  1.00110.00           C
ATOM   1406  C   GLU A 364      20.676  23.013  16.675  1.00110.00           C
ATOM   1407  O   GLU A 364      19.866  23.008  15.749  1.00110.00           O
ATOM   1408  N   ARG A 365      21.989  22.916  16.464  1.00 10.00           N
ATOM   1409  CA  ARG A 365      22.567  22.731  15.133  1.00 10.00           C
ATOM   1410  C   ARG A 365      22.260  21.323  14.621  1.00 10.00           C
ATOM   1411  O   ARG A 365      22.752  20.372  15.221  1.00 10.00           O
ATOM   1412  CB  ARG A 365      24.097  22.955  15.230  1.00 10.00           C
ATOM   1413  CG  ARG A 365      24.843  23.040  13.893  1.00 10.00           C
ATOM   1414  CD  ARG A 365      25.191  21.685  13.278  1.00 10.00           C
ATOM   1415  NE  ARG A 365      26.081  21.853  12.121  1.00 10.00           N
ATOM   1416  CZ  ARG A 365      26.624  20.839  11.424  1.00 10.00           C
ATOM   1417  NH1 ARG A 365      26.365  19.564  11.722  1.00 10.00           N
ATOM   1418  NH2 ARG A 365      27.440  21.106  10.402  1.00 10.00           N1+
ATOM   1419  N   ALA A 366      21.571  21.163  13.476  1.00 30.00           N
ATOM   1420  CA  ALA A 366      21.265  19.861  12.902  1.00 30.00           C
ATOM   1421  C   ALA A 366      21.591  19.891  11.412  1.00 30.00           C
ATOM   1422  O   ALA A 366      21.296  20.876  10.744  1.00 30.00           O
ATOM   1423  N   ALA A 367      22.194  18.814  10.924  1.00 30.00           N
ATOM   1424  CA  ALA A 367      22.461  18.684   9.506  1.00 30.00           C
ATOM   1425  C   ALA A 367      21.720  17.417   9.037  1.00 30.00           C
ATOM   1426  O   ALA A 367      21.893  16.348   9.622  1.00 30.00           O
ATOM   1427  N   HIS A 368      20.955  17.567   7.961  1.00 30.00           N
ATOM   1428  CA  HIS A 368      20.243  16.402   7.426  1.00 30.00           C
ATOM   1429  C   HIS A 368      20.777  16.119   6.034  1.00 30.00           C
ATOM   1430  O   HIS A 368      21.055  17.075   5.299  1.00 30.00           O
ATOM   1431  CB  HIS A 368      18.727  16.665   7.244  1.00 30.00           C
ATOM   1432  CG  HIS A 368      17.860  15.636   7.898  1.00110.00           C
ATOM   1433  ND1 HIS A 368      17.852  14.308   7.542  1.00110.00           N
ATOM   1434  CD2 HIS A 368      16.912  15.727   8.893  1.00110.00           C
ATOM   1435  CE1 HIS A 368      16.994  13.661   8.386  1.00110.00           C
ATOM   1436  NE2 HIS A 368      16.415  14.494   9.221  1.00110.00           N
ATOM   1437  N   VAL A 369      20.954  14.848   5.711  1.00 30.00           N
ATOM   1438  CA  VAL A 369      21.401  14.439   4.384  1.00 30.00           C
ATOM   1439  C   VAL A 369      20.405  13.404   3.863  1.00 30.00           C
ATOM   1440  O   VAL A 369      20.016  12.503   4.600  1.00 30.00           O
ATOM   1441  N   ASN A 370      19.971  13.512   2.607  1.00 30.00           N
ATOM   1442  CA  ASN A 370      18.905  12.649   2.134  1.00 30.00           C
ATOM   1443  C   ASN A 370      19.078  12.185   0.711  1.00 30.00           C
ATOM   1444  O   ASN A 370      19.530  12.959  -0.124  1.00 30.00           O
ATOM   1445  N   ALA A 371      18.685  10.941   0.447  1.00 30.00           N
ATOM   1446  CA  ALA A 371      18.642  10.447  -0.929  1.00 30.00           C
ATOM   1447  C   ALA A 371      17.210   9.963  -1.153  1.00 30.00           C
ATOM   1448  O   ALA A 371      16.620   9.259  -0.342  1.00 30.00           O
ATOM   1449  N   GLN A 372      16.585  10.535  -2.179  1.00 30.00           N
ATOM   1450  CA  GLN A 372      15.184  10.345  -2.491  1.00 30.00           C
ATOM   1451  C   GLN A 372      14.935   9.725  -3.860  1.00 30.00           C
ATOM   1452  O   GLN A 372      15.315  10.268  -4.894  1.00 30.00           O
ATOM   1453  N   PHE A 373      14.229   8.603  -3.875  1.00 30.00           N
ATOM   1454  CA  PHE A 373      13.679   8.041  -5.100  1.00 30.00           C
ATOM   1455  C   PHE A 373      12.157   8.257  -4.983  1.00 30.00           C
ATOM   1456  O   PHE A 373      11.580   8.052  -3.912  1.00 30.00           O
ATOM   1457  CB  PHE A 373      13.577   6.555  -5.081  1.00 30.00           C
ATOM   1458  CG  PHE A 373      12.491   5.855  -5.904  1.00110.00           C
ATOM   1459  CD1 PHE A 373      12.833   5.248  -7.080  1.00110.00           C
ATOM   1460  CD2 PHE A 373      11.164   5.673  -5.440  1.00110.00           C
ATOM   1461  CE1 PHE A 373      11.864   4.584  -7.800  1.00110.00           C
ATOM   1462  CE2 PHE A 373      10.223   4.924  -6.125  1.00110.00           C
ATOM   1463  CZ  PHE A 373      10.555   4.424  -7.352  1.00110.00           C
ATOM   1464  N   ARG A 374      11.532   8.723  -6.049  1.00 30.00           N
ATOM   1465  CA  ARG A 374      10.094   8.958  -5.995  1.00 30.00           C
ATOM   1466  C   ARG A 374       9.484   8.637  -7.356  1.00 30.00           C
ATOM   1467  O   ARG A 374      10.155   8.759  -8.373  1.00 30.00           O
ATOM   1468  CB  ARG A 374       9.796  10.418  -5.610  1.00 30.00           C
ATOM   1469  CG  ARG A 374      10.407  11.459  -6.557  1.00110.00           C
ATOM   1470  CD  ARG A 374      10.111  12.887  -6.115  1.00110.00           C
ATOM   1471  NE  ARG A 374      10.681  13.843  -7.077  1.00110.00           N
ATOM   1472  CZ  ARG A 374      11.358  14.968  -6.805  1.00110.00           C
ATOM   1473  NH1 ARG A 374      11.742  15.301  -5.574  1.00110.00           N
ATOM   1474  NH2 ARG A 374      11.665  15.798  -7.808  1.00110.00           N1+
ATOM   1475  N   PHE A 375       8.186   8.347  -7.305  1.00 30.00           N
ATOM   1476  CA  PHE A 375       7.456   8.052  -8.520  1.00 30.00           C
ATOM   1477  C   PHE A 375       6.032   8.604  -8.417  1.00 30.00           C
ATOM   1478  O   PHE A 375       5.531   8.853  -7.308  1.00 30.00           O
ATOM   1479  OXT PHE A 375       5.341   8.702  -9.451  1.00 30.00           O1-
ATOM   1480  CB  PHE A 375       7.294   6.546  -8.782  1.00 30.00           C
ATOM   1481  CG  PHE A 375       6.409   5.794  -7.806  1.00 30.00           C
ATOM   1482  CD1 PHE A 375       6.821   5.561  -6.493  1.00 30.00           C
ATOM   1483  CD2 PHE A 375       5.159   5.311  -8.194  1.00 30.00           C
ATOM   1484  CE1 PHE A 375       6.058   4.793  -5.616  1.00 30.00           C
ATOM   1485  CE2 PHE A 375       4.380   4.564  -7.309  1.00 30.00           C
ATOM   1486  CZ  PHE A 375       4.829   4.297  -6.024  1.00 30.00           C
TER    1487      PHE A 375
ATOM   1488  N   LEU B   1      -8.770  -1.492 -10.141  1.00 30.00           N1+
ATOM   1489  CA  LEU B   1      -8.473  -1.356 -11.596  1.00 30.00           C
ATOM   1490  C   LEU B   1      -7.415  -2.400 -11.991  1.00 30.00           C
ATOM   1491  O   LEU B   1      -6.565  -2.742 -11.181  1.00 30.00           O
ATOM   1492  N   PRO B   2      -7.539  -2.928 -13.190  1.00 30.00           N
ATOM   1493  CA  PRO B   2      -6.597  -3.938 -13.668  1.00 30.00           C
ATOM   1494  C   PRO B   2      -5.336  -3.239 -14.110  1.00 30.00           C
ATOM   1495  O   PRO B   2      -5.455  -2.506 -15.082  1.00 30.00           O
ATOM   1496  N   VAL B   3      -4.221  -3.338 -13.402  1.00 30.00           N
ATOM   1497  CA  VAL B   3      -3.029  -2.572 -13.793  1.00 30.00           C
ATOM   1498  C   VAL B   3      -1.966  -3.454 -14.432  1.00 30.00           C
ATOM   1499  O   VAL B   3      -0.843  -3.006 -14.668  1.00 30.00           O
ATOM   1500  N   GLY B   4      -2.303  -4.728 -14.604  1.00 30.00           N
ATOM   1501  CA  GLY B   4      -1.315  -5.660 -15.147  1.00 30.00           C
ATOM   1502  C   GLY B   4      -2.049  -6.897 -15.648  1.00 30.00           C
ATOM   1503  O   GLY B   4      -2.978  -7.393 -15.016  1.00 30.00           O
ATOM   1504  N   ASN B   5      -1.677  -7.309 -16.847  1.00 30.00           N
ATOM   1505  CA  ASN B   5      -2.278  -8.446 -17.515  1.00 30.00           C
ATOM   1506  C   ASN B   5      -1.282  -8.925 -18.570  1.00 30.00           C
ATOM   1507  O   ASN B   5      -1.264  -8.370 -19.663  1.00 30.00           O
ATOM   1508  N   PRO B   6      -0.458  -9.890 -18.221  1.00 30.00           N
ATOM   1509  CA  PRO B   6       0.546 -10.379 -19.158  1.00 30.00           C
ATOM   1510  C   PRO B   6       0.985 -11.778 -18.756  1.00 30.00           C
ATOM   1511  O   PRO B   6       1.042 -12.094 -17.564  1.00 30.00           O
ATOM   1512  N   ALA B   7       1.259 -12.618 -19.756  1.00 30.00           N
ATOM   1513  CA  ALA B   7       1.682 -13.989 -19.533  1.00 30.00           C
ATOM   1514  C   ALA B   7       0.769 -14.810 -18.632  1.00 30.00           C
ATOM   1515  O   ALA B   7       1.277 -15.466 -17.712  1.00 30.00           O
ATOM   1516  N   GLU B   8      -0.541 -14.697 -18.718  1.00 30.00           N
ATOM   1517  CA  GLU B   8      -1.476 -15.422 -17.892  1.00 30.00           C
ATOM   1518  C   GLU B   8      -1.774 -14.848 -16.512  1.00 30.00           C
ATOM   1519  O   GLU B   8      -2.696 -15.337 -15.851  1.00 30.00           O
ATOM   1520  N   PRO B   9      -1.074 -13.817 -16.052  1.00 30.00           N
ATOM   1521  CA  PRO B   9      -1.335 -13.220 -14.761  1.00 30.00           C
ATOM   1522  C   PRO B   9      -2.035 -11.866 -14.882  1.00 30.00           C
ATOM   1523  O   PRO B   9      -1.601 -10.988 -15.628  1.00 30.00           O
ATOM   1524  N   SER B  10      -3.117 -11.677 -14.131  1.00 30.00           N
ATOM   1525  CA  SER B  10      -3.781 -10.381 -14.106  1.00 30.00           C
ATOM   1526  C   SER B  10      -3.917  -9.918 -12.646  1.00 30.00           C
ATOM   1527  O   SER B  10      -4.314 -10.625 -11.722  1.00 30.00           O
ATOM   1528  N   LEU B  11      -3.509  -8.676 -12.447  1.00 30.00           N
ATOM   1529  CA  LEU B  11      -3.531  -8.059 -11.132  1.00 30.00           C
ATOM   1530  C   LEU B  11      -4.499  -6.882 -11.134  1.00 30.00           C
ATOM   1531  O   LEU B  11      -4.365  -6.004 -11.973  1.00 30.00           O
ATOM   1532  N   MET B  12      -5.408  -6.855 -10.184  1.00 30.00           N
ATOM   1533  CA  MET B  12      -6.298  -5.717 -10.023  1.00 30.00           C
ATOM   1534  C   MET B  12      -5.883  -4.988  -8.743  1.00 30.00           C
ATOM   1535  O   MET B  12      -5.903  -5.605  -7.673  1.00 30.00           O
ATOM   1536  N   ILE B  13      -5.491  -3.724  -8.850  1.00 30.00           N
ATOM   1537  CA  ILE B  13      -5.104  -2.945  -7.674  1.00 30.00           C
ATOM   1538  C   ILE B  13      -6.268  -1.986  -7.424  1.00 30.00           C
ATOM   1539  O   ILE B  13      -6.717  -1.374  -8.390  1.00 30.00           O
ATOM   1540  N   ASP B  14      -6.953  -2.147  -6.295  1.00 30.00           N
ATOM   1541  CA  ASP B  14      -8.186  -1.380  -6.110  1.00 30.00           C
ATOM   1542  C   ASP B  14      -8.163  -0.650  -4.774  1.00 30.00           C
ATOM   1543  O   ASP B  14      -7.323  -0.907  -3.912  1.00 30.00           O
ATOM   1544  N   GLY B  15      -9.096   0.301  -4.647  1.00 30.00           N
ATOM   1545  CA  GLY B  15      -9.114   1.134  -3.455  1.00 30.00           C
ATOM   1546  C   GLY B  15     -10.201   2.193  -3.508  1.00 30.00           C
ATOM   1547  O   GLY B  15     -10.899   2.383  -4.506  1.00 30.00           O
ATOM   1548  N   ILE B  16     -10.283   2.929  -2.398  1.00 30.00           N
ATOM   1549  CA  ILE B  16     -11.260   4.009  -2.348  1.00 30.00           C
ATOM   1550  C   ILE B  16     -10.884   4.974  -1.245  1.00 30.00           C
ATOM   1551  O   ILE B  16     -10.132   4.657  -0.336  1.00 30.00           O
ATOM   1552  N   LEU B  17     -11.342   6.197  -1.424  1.00 30.00           N
ATOM   1553  CA  LEU B  17     -11.120   7.265  -0.459  1.00 30.00           C
ATOM   1554  C   LEU B  17     -12.536   7.749  -0.164  1.00 30.00           C
ATOM   1555  O   LEU B  17     -13.283   8.044  -1.109  1.00 30.00           O
ATOM   1556  N   TRP B  18     -12.995   7.486   1.059  1.00 30.00           N
ATOM   1557  CA  TRP B  18     -14.369   7.806   1.413  1.00 30.00           C
ATOM   1558  C   TRP B  18     -14.449   8.953   2.415  1.00 30.00           C
ATOM   1559  O   TRP B  18     -14.183   8.757   3.601  1.00 30.00           O
ATOM   1560  CB  TRP B  18     -14.936   6.499   2.033  1.00 30.00           C
ATOM   1561  CG  TRP B  18     -16.400   6.201   1.922  1.00110.00           C
ATOM   1562  CD1 TRP B  18     -17.329   6.742   1.064  1.00110.00           C
ATOM   1563  CD2 TRP B  18     -17.093   5.186   2.673  1.00110.00           C
ATOM   1564  NE1 TRP B  18     -18.514   6.065   1.208  1.00110.00           N
ATOM   1565  CE3 TRP B  18     -16.712   4.284   3.689  1.00110.00           C
ATOM   1566  CE2 TRP B  18     -18.410   5.142   2.219  1.00110.00           C
ATOM   1567  CZ3 TRP B  18     -17.661   3.409   4.232  1.00110.00           C
ATOM   1568  CZ2 TRP B  18     -19.373   4.272   2.745  1.00110.00           C
ATOM   1569  CH2 TRP B  18     -18.975   3.412   3.771  1.00110.00           C
ATOM   1570  N   GLU B  19     -14.886  10.119   1.940  1.00 30.00           N
ATOM   1571  CA  GLU B  19     -15.077  11.266   2.846  1.00 30.00           C
ATOM   1572  C   GLU B  19     -16.457  11.031   3.484  1.00 30.00           C
ATOM   1573  O   GLU B  19     -17.441  10.860   2.767  1.00 30.00           O
ATOM   1574  N   GLY B  20     -16.509  10.836   4.788  1.00 30.00           N
ATOM   1575  CA  GLY B  20     -17.700  10.341   5.447  1.00 30.00           C
ATOM   1576  C   GLY B  20     -17.937  11.038   6.785  1.00 30.00           C
ATOM   1577  O   GLY B  20     -17.011  11.183   7.573  1.00 30.00           O
ATOM   1578  N   PHE B  21     -19.195  11.422   7.007  1.00 30.00           N
ATOM   1579  CA  PHE B  21     -19.561  12.154   8.215  1.00 30.00           C
ATOM   1580  C   PHE B  21     -20.901  11.674   8.773  1.00 30.00           C
ATOM   1581  O   PHE B  21     -21.845  11.390   8.020  1.00 30.00           O
ATOM   1582  CB  PHE B  21     -19.641  13.656   7.853  1.00 30.00           C
ATOM   1583  CG  PHE B  21     -20.432  14.541   8.787  1.00110.00           C
ATOM   1584  CD1 PHE B  21     -21.786  14.809   8.516  1.00110.00           C
ATOM   1585  CD2 PHE B  21     -19.845  15.099   9.927  1.00110.00           C
ATOM   1586  CE1 PHE B  21     -22.538  15.614   9.371  1.00110.00           C
ATOM   1587  CE2 PHE B  21     -20.600  15.917  10.772  1.00110.00           C
ATOM   1588  CZ  PHE B  21     -21.943  16.171  10.499  1.00110.00           C
ATOM   1589  N   GLY B  22     -20.906  11.318  10.051  1.00 30.00           N
ATOM   1590  CA  GLY B  22     -22.104  10.868  10.742  1.00 30.00           C
ATOM   1591  C   GLY B  22     -22.684  12.029  11.567  1.00 30.00           C
ATOM   1592  O   GLY B  22     -21.976  12.701  12.316  1.00 30.00           O
ATOM   1593  N   GLY B  23     -23.984  12.180  11.458  1.00 30.00           N
ATOM   1594  CA  GLY B  23     -24.712  13.208  12.194  1.00 30.00           C
ATOM   1595  C   GLY B  23     -25.704  12.561  13.156  1.00 30.00           C
ATOM   1596  O   GLY B  23     -26.602  11.833  12.743  1.00 30.00           O
ATOM   1597  N   ASP B  24     -25.503  12.754  14.438  1.00 30.00           N
ATOM   1598  CA  ASP B  24     -26.369  12.308  15.510  1.00 30.00           C
ATOM   1599  C   ASP B  24     -26.403  13.376  16.612  1.00 30.00           C
ATOM   1600  O   ASP B  24     -25.586  14.297  16.642  1.00 30.00           O
ATOM   1601  N   PRO B  25     -27.427  13.331  17.498  1.00110.00           N
ATOM   1602  CA  PRO B  25     -27.517  14.191  18.675  1.00110.00           C
ATOM   1603  C   PRO B  25     -26.816  13.603  19.905  1.00110.00           C
ATOM   1604  O   PRO B  25     -26.763  14.282  20.928  1.00110.00           O
ATOM   1605  N   CYS B  26     -26.307  12.368  19.814  1.00110.00           N
ATOM   1606  CA  CYS B  26     -25.627  11.763  21.018  1.00110.00           C
ATOM   1607  C   CYS B  26     -24.257  11.162  20.686  1.00110.00           C
ATOM   1608  O   CYS B  26     -23.297  11.382  21.423  1.00110.00           O
ATOM   1609  CB  CYS B  26     -26.538  10.769  21.769  1.00110.00           C
ATOM   1610  SG  CYS B  26     -27.060   9.260  20.892  1.00110.00           S
ATOM   1611  N   THR B  31     -24.163  10.421  19.581  1.00110.00           N
ATOM   1612  CA  THR B  31     -22.925   9.785  19.140  1.00110.00           C
ATOM   1613  C   THR B  31     -22.630  10.296  17.728  1.00110.00           C
ATOM   1614  O   THR B  31     -23.004  11.424  17.392  1.00110.00           O
ATOM   1615  N   TRP B  32     -21.949   9.506  16.910  1.00110.00           N
ATOM   1616  CA  TRP B  32     -21.686   9.892  15.467  1.00110.00           C
ATOM   1617  C   TRP B  32     -21.432   8.525  15.041  1.00110.00           C
ATOM   1618  O   TRP B  32     -21.369   7.705  15.947  1.00110.00           O
ATOM   1619  CB  TRP B  32     -20.485  10.832  15.305  1.00110.00           C
ATOM   1620  CG  TRP B  32     -19.275  10.481  16.137  1.00110.00           C
ATOM   1621  CD1 TRP B  32     -19.078  10.815  17.464  1.00110.00           C
ATOM   1622  CD2 TRP B  32     -18.106   9.766  15.719  1.00110.00           C
ATOM   1623  NE1 TRP B  32     -17.885  10.287  17.879  1.00110.00           N
ATOM   1624  CE3 TRP B  32     -17.682   9.199  14.500  1.00110.00           C
ATOM   1625  CE2 TRP B  32     -17.262   9.658  16.826  1.00110.00           C
ATOM   1626  CZ3 TRP B  32     -16.449   8.538  14.438  1.00110.00           C
ATOM   1627  CZ2 TRP B  32     -16.023   9.007  16.779  1.00110.00           C
ATOM   1628  CH2 TRP B  32     -15.632   8.445  15.561  1.00110.00           C
ATOM   1629  N   CYS B  33     -21.331   8.168  13.767  1.00110.00           N
ATOM   1630  CA  CYS B  33     -21.182   6.748  13.446  1.00110.00           C
ATOM   1631  C   CYS B  33     -19.738   6.448  13.038  1.00110.00           C
ATOM   1632  O   CYS B  33     -18.896   6.155  13.884  1.00110.00           O
ATOM   1633  CB  CYS B  33     -22.238   6.262  12.452  1.00110.00           C
ATOM   1634  SG  CYS B  33     -22.114   4.445  12.171  1.00110.00           S
ATOM   1635  N   ASP B  34     -19.478   6.518  11.732  1.00110.00           N
ATOM   1636  CA  ASP B  34     -18.177   6.295  11.129  1.00110.00           C
ATOM   1637  C   ASP B  34     -17.612   7.658  10.707  1.00110.00           C
ATOM   1638  O   ASP B  34     -18.266   8.697  10.830  1.00110.00           O
ATOM   1639  N   ALA B  35     -16.377   7.637  10.218  1.00110.00           N
ATOM   1640  CA  ALA B  35     -15.652   8.812   9.751  1.00110.00           C
ATOM   1641  C   ALA B  35     -14.920   8.444   8.468  1.00110.00           C
ATOM   1642  O   ALA B  35     -14.984   7.290   8.039  1.00110.00           O
ATOM   1643  N   ILE B  36     -14.202   9.410   7.884  1.00 30.00           N
ATOM   1644  CA  ILE B  36     -13.397   9.266   6.687  1.00 30.00           C
ATOM   1645  C   ILE B  36     -12.453   8.075   6.749  1.00 30.00           C
ATOM   1646  O   ILE B  36     -11.864   7.748   7.793  1.00 30.00           O
ATOM   1647  N   SER B  37     -12.426   7.285   5.663  1.00 30.00           N
ATOM   1648  CA  SER B  37     -11.486   6.155   5.626  1.00 30.00           C
ATOM   1649  C   SER B  37     -11.060   5.913   4.179  1.00 30.00           C
ATOM   1650  O   SER B  37     -11.592   6.488   3.223  1.00 30.00           O
ATOM   1651  N   MET B  38     -10.031   5.086   4.009  1.00 30.00           N
ATOM   1652  CA  MET B  38      -9.578   4.718   2.662  1.00 30.00           C
ATOM   1653  C   MET B  38      -9.393   3.206   2.662  1.00 30.00           C
ATOM   1654  O   MET B  38      -9.232   2.614   3.729  1.00 30.00           O
ATOM   1655  N   ARG B  39      -9.434   2.610   1.481  1.00 30.00           N
ATOM   1656  CA  ARG B  39      -9.247   1.174   1.379  1.00 30.00           C
ATOM   1657  C   ARG B  39      -8.145   0.942   0.343  1.00 30.00           C
ATOM   1658  O   ARG B  39      -8.093   1.705  -0.609  1.00 30.00           O
ATOM   1659  CB  ARG B  39     -10.520   0.470   0.879  1.00 30.00           C
ATOM   1660  CG  ARG B  39     -11.689   0.466   1.872  1.00 30.00           C
ATOM   1661  CD  ARG B  39     -11.584  -0.661   2.893  1.00 30.00           C
ATOM   1662  NE  ARG B  39     -12.692  -0.656   3.851  1.00 30.00           N
ATOM   1663  CZ  ARG B  39     -13.954  -1.052   3.643  1.00 30.00           C
ATOM   1664  NH1 ARG B  39     -14.386  -1.479   2.456  1.00 30.00           N
ATOM   1665  NH2 ARG B  39     -14.804  -1.023   4.670  1.00 30.00           N1+
ATOM   1666  N   VAL B  40      -7.328  -0.075   0.532  1.00 30.00           N
ATOM   1667  CA  VAL B  40      -6.374  -0.416  -0.528  1.00 30.00           C
ATOM   1668  C   VAL B  40      -6.378  -1.949  -0.615  1.00 30.00           C
ATOM   1669  O   VAL B  40      -6.434  -2.634   0.410  1.00 30.00           O
ATOM   1670  N   GLY B  41      -6.318  -2.501  -1.817  1.00 30.00           N
ATOM   1671  CA  GLY B  41      -6.293  -3.963  -1.924  1.00 30.00           C
ATOM   1672  C   GLY B  41      -5.743  -4.359  -3.297  1.00 30.00           C
ATOM   1673  O   GLY B  41      -5.639  -3.553  -4.228  1.00 30.00           O
ATOM   1674  N   TYR B  42      -5.425  -5.642  -3.399  1.00 30.00           N
ATOM   1675  CA  TYR B  42      -5.045  -6.204  -4.673  1.00 30.00           C
ATOM   1676  C   TYR B  42      -5.823  -7.530  -4.807  1.00 30.00           C
ATOM   1677  O   TYR B  42      -6.101  -8.213  -3.820  1.00 30.00           O
ATOM   1678  CB  TYR B  42      -3.549  -6.568  -4.741  1.00 30.00           C
ATOM   1679  CG  TYR B  42      -2.528  -5.547  -4.286  1.00110.00           C
ATOM   1680  CD1 TYR B  42      -2.642  -4.200  -4.628  1.00110.00           C
ATOM   1681  CD2 TYR B  42      -1.382  -5.954  -3.588  1.00110.00           C
ATOM   1682  CE1 TYR B  42      -1.645  -3.282  -4.315  1.00110.00           C
ATOM   1683  CE2 TYR B  42      -0.361  -5.043  -3.296  1.00110.00           C
ATOM   1684  CZ  TYR B  42      -0.491  -3.721  -3.699  1.00110.00           C
ATOM   1685  OH  TYR B  42       0.521  -2.820  -3.570  1.00110.00           O
ATOM   1686  N   TYR B  43      -6.101  -7.882  -6.058  1.00 30.00           N
ATOM   1687  CA  TYR B  43      -6.722  -9.141  -6.390  1.00 30.00           C
ATOM   1688  C   TYR B  43      -5.927  -9.671  -7.607  1.00 30.00           C
ATOM   1689  O   TYR B  43      -5.887  -8.993  -8.629  1.00 30.00           O
ATOM   1690  CB  TYR B  43      -8.191  -9.044  -6.834  1.00 30.00           C
ATOM   1691  CG  TYR B  43      -9.223  -8.746  -5.773  1.00110.00           C
ATOM   1692  CD1 TYR B  43      -9.311  -7.476  -5.189  1.00110.00           C
ATOM   1693  CD2 TYR B  43     -10.175  -9.717  -5.425  1.00110.00           C
ATOM   1694  CE1 TYR B  43     -10.318  -7.186  -4.266  1.00110.00           C
ATOM   1695  CE2 TYR B  43     -11.187  -9.427  -4.507  1.00110.00           C
ATOM   1696  CZ  TYR B  43     -11.246  -8.163  -3.929  1.00110.00           C
ATOM   1697  OH  TYR B  43     -12.211  -7.841  -3.019  1.00110.00           O
ATOM   1698  N   GLY B  44      -5.374 -10.850  -7.470  1.00 30.00           N
ATOM   1699  CA  GLY B  44      -4.591 -11.452  -8.538  1.00 30.00           C
ATOM   1700  C   GLY B  44      -5.232 -12.799  -8.919  1.00 30.00           C
ATOM   1701  O   GLY B  44      -5.877 -13.488  -8.136  1.00 30.00           O
ATOM   1702  N   ASP B  45      -4.971 -13.168 -10.156  1.00 30.00           N
ATOM   1703  CA  ASP B  45      -5.464 -14.392 -10.762  1.00 30.00           C
ATOM   1704  C   ASP B  45      -4.491 -14.802 -11.862  1.00 30.00           C
ATOM   1705  O   ASP B  45      -4.154 -13.974 -12.702  1.00 30.00           O
ATOM   1706  N   PHE B  46      -3.991 -16.014 -11.815  1.00 30.00           N
ATOM   1707  CA  PHE B  46      -3.064 -16.495 -12.828  1.00 30.00           C
ATOM   1708  C   PHE B  46      -3.646 -17.772 -13.440  1.00 30.00           C
ATOM   1709  O   PHE B  46      -4.159 -18.651 -12.747  1.00 30.00           O
ATOM   1710  CB  PHE B  46      -1.674 -16.862 -12.318  1.00 30.00           C
ATOM   1711  CG  PHE B  46      -0.585 -17.219 -13.304  1.00110.00           C
ATOM   1712  CD1 PHE B  46      -0.510 -18.445 -13.935  1.00110.00           C
ATOM   1713  CD2 PHE B  46       0.472 -16.354 -13.531  1.00110.00           C
ATOM   1714  CE1 PHE B  46       0.518 -18.727 -14.846  1.00110.00           C
ATOM   1715  CE2 PHE B  46       1.576 -16.676 -14.331  1.00110.00           C
ATOM   1716  CZ  PHE B  46       1.566 -17.846 -15.050  1.00110.00           C
ATOM   1717  N   VAL B  47      -3.591 -17.845 -14.760  1.00 30.00           N
ATOM   1718  CA  VAL B  47      -4.087 -19.021 -15.471  1.00 30.00           C
ATOM   1719  C   VAL B  47      -2.911 -19.982 -15.587  1.00 30.00           C
ATOM   1720  O   VAL B  47      -1.957 -19.643 -16.265  1.00 30.00           O
ATOM   1721  N   PHE B  48      -2.981 -21.135 -14.893  1.00110.00           N
ATOM   1722  CA  PHE B  48      -1.961 -22.172 -14.884  1.00110.00           C
ATOM   1723  C   PHE B  48      -2.537 -23.550 -14.740  1.00110.00           C
ATOM   1724  O   PHE B  48      -2.077 -24.338 -13.912  1.00110.00           O
ATOM   1725  CB  PHE B  48      -0.640 -22.108 -14.072  1.00110.00           C
ATOM   1726  CG  PHE B  48       0.413 -22.976 -14.816  1.00110.00           C
ATOM   1727  CD1 PHE B  48       0.660 -24.310 -14.446  1.00110.00           C
ATOM   1728  CD2 PHE B  48       1.013 -22.510 -16.002  1.00110.00           C
ATOM   1729  CE1 PHE B  48       1.450 -25.151 -15.240  1.00110.00           C
ATOM   1730  CE2 PHE B  48       1.820 -23.343 -16.783  1.00110.00           C
ATOM   1731  CZ  PHE B  48       2.032 -24.666 -16.407  1.00110.00           C
ATOM   1732  N   ASP B  49      -3.592 -23.803 -15.506  1.00110.00           N
ATOM   1733  CA  ASP B  49      -4.279 -25.086 -15.520  1.00110.00           C
ATOM   1734  C   ASP B  49      -4.982 -25.319 -14.163  1.00110.00           C
ATOM   1735  O   ASP B  49      -5.495 -26.403 -13.893  1.00110.00           O
ATOM   1736  N   ARG B  50      -4.969 -24.292 -13.304  1.00110.00           N
ATOM   1737  CA  ARG B  50      -5.425 -24.296 -11.871  1.00110.00           C
ATOM   1738  C   ARG B  50      -6.031 -22.955 -11.340  1.00110.00           C
ATOM   1739  O   ARG B  50      -6.357 -22.866 -10.157  1.00110.00           O
ATOM   1740  CB  ARG B  50      -4.278 -24.771 -10.958  1.00110.00           C
ATOM   1741  CG  ARG B  50      -3.842 -26.230 -11.142  1.00110.00           C
ATOM   1742  CD  ARG B  50      -2.631 -26.560 -10.268  1.00110.00           C
ATOM   1743  NE  ARG B  50      -2.972 -26.640  -8.845  1.00110.00           N
ATOM   1744  CZ  ARG B  50      -2.074 -26.907  -7.876  1.00110.00           C
ATOM   1745  NH1 ARG B  50      -0.771 -27.017  -8.127  1.00110.00           N
ATOM   1746  NH2 ARG B  50      -2.494 -27.075  -6.620  1.00110.00           N1+
ATOM   1747  N   VAL B  51      -6.149 -21.962 -12.237  1.00110.00           N
ATOM   1748  CA  VAL B  51      -6.738 -20.623 -12.031  1.00110.00           C
ATOM   1749  C   VAL B  51      -6.515 -20.138 -10.594  1.00110.00           C
ATOM   1750  O   VAL B  51      -7.446 -19.961  -9.807  1.00110.00           O
ATOM   1751  N   LEU B  52      -5.241 -20.051 -10.236  1.00110.00           N
ATOM   1752  CA  LEU B  52      -4.832 -19.763  -8.886  1.00110.00           C
ATOM   1753  C   LEU B  52      -5.098 -18.260  -8.646  1.00110.00           C
ATOM   1754  O   LEU B  52      -5.022 -17.471  -9.590  1.00110.00           O
ATOM   1755  N   LYS B  53      -5.282 -17.804  -7.398  1.00 30.00           N
ATOM   1756  CA  LYS B  53      -5.738 -16.450  -7.128  1.00 30.00           C
ATOM   1757  C   LYS B  53      -5.338 -16.077  -5.700  1.00 30.00           C
ATOM   1758  O   LYS B  53      -5.085 -16.937  -4.878  1.00 30.00           O
ATOM   1759  CB  LYS B  53      -7.280 -16.383  -7.367  1.00 30.00           C
ATOM   1760  CG  LYS B  53      -8.085 -15.387  -6.522  1.00110.00           C
ATOM   1761  CD  LYS B  53      -9.551 -15.329  -6.968  1.00110.00           C
ATOM   1762  CE  LYS B  53     -10.466 -14.587  -5.997  1.00110.00           C
ATOM   1763  NZ  LYS B  53     -10.503 -15.261  -4.686  1.00110.00           N1+
ATOM   1764  N   THR B  54      -5.288 -14.764  -5.478  1.00 30.00           N
ATOM   1765  CA  THR B  54      -4.921 -14.251  -4.165  1.00 30.00           C
ATOM   1766  C   THR B  54      -5.590 -12.885  -3.994  1.00 30.00           C
ATOM   1767  O   THR B  54      -5.785 -12.167  -4.977  1.00 30.00           O
ATOM   1768  N   ASP B  55      -5.914 -12.586  -2.749  1.00 30.00           N
ATOM   1769  CA  ASP B  55      -6.525 -11.270  -2.505  1.00 30.00           C
ATOM   1770  C   ASP B  55      -6.080 -10.750  -1.157  1.00 30.00           C
ATOM   1771  O   ASP B  55      -5.852 -11.509  -0.220  1.00 30.00           O
ATOM   1772  N   VAL B  56      -5.878  -9.443  -1.068  1.00 30.00           N
ATOM   1773  CA  VAL B  56      -5.482  -8.784   0.161  1.00 30.00           C
ATOM   1774  C   VAL B  56      -6.189  -7.425   0.149  1.00 30.00           C
ATOM   1775  O   VAL B  56      -6.279  -6.783  -0.886  1.00 30.00           O
ATOM   1776  N   ASN B  57      -6.723  -7.048   1.289  1.00 30.00           N
ATOM   1777  CA  ASN B  57      -7.438  -5.780   1.416  1.00 30.00           C
ATOM   1778  C   ASN B  57      -7.245  -5.219   2.823  1.00 30.00           C
ATOM   1779  O   ASN B  57      -7.334  -5.929   3.832  1.00 30.00           O
ATOM   1780  N   LYS B  58      -6.969  -3.932   2.858  1.00 30.00           N
ATOM   1781  CA  LYS B  58      -6.694  -3.216   4.081  1.00 30.00           C
ATOM   1782  C   LYS B  58      -7.580  -1.991   4.253  1.00 30.00           C
ATOM   1783  O   LYS B  58      -7.970  -1.341   3.297  1.00 30.00           O
ATOM   1784  CB  LYS B  58      -5.201  -2.837   4.098  1.00 30.00           C
ATOM   1785  CG  LYS B  58      -4.710  -2.561   5.518  1.00110.00           C
ATOM   1786  CD  LYS B  58      -3.208  -2.735   5.665  1.00110.00           C
ATOM   1787  CE  LYS B  58      -2.754  -2.661   7.111  1.00110.00           C
ATOM   1788  NZ  LYS B  58      -2.937  -1.304   7.655  1.00110.00           N1+
ATOM   1789  N   GLU B  59      -7.808  -1.630   5.509  1.00 30.00           N
ATOM   1790  CA  GLU B  59      -8.615  -0.488   5.871  1.00 30.00           C
ATOM   1791  C   GLU B  59      -7.707   0.528   6.566  1.00 30.00           C
ATOM   1792  O   GLU B  59      -7.098   0.154   7.566  1.00 30.00           O
ATOM   1793  N   PHE B  60      -7.603   1.722   6.029  1.00 30.00           N
ATOM   1794  CA  PHE B  60      -6.826   2.795   6.616  1.00 30.00           C
ATOM   1795  C   PHE B  60      -7.809   3.877   7.112  1.00 30.00           C
ATOM   1796  O   PHE B  60      -8.475   4.476   6.258  1.00 30.00           O
ATOM   1797  CB  PHE B  60      -5.836   3.403   5.611  1.00 30.00           C
ATOM   1798  CG  PHE B  60      -4.597   2.547   5.468  1.00 30.00           C
ATOM   1799  CD1 PHE B  60      -3.478   2.790   6.277  1.00 30.00           C
ATOM   1800  CD2 PHE B  60      -4.564   1.479   4.566  1.00 30.00           C
ATOM   1801  CE1 PHE B  60      -2.349   1.979   6.190  1.00 30.00           C
ATOM   1802  CE2 PHE B  60      -3.421   0.693   4.455  1.00 30.00           C
ATOM   1803  CZ  PHE B  60      -2.316   0.940   5.265  1.00 30.00           C
ATOM   1804  N   GLN B  61      -7.945   4.074   8.431  1.00110.00           N
ATOM   1805  CA  GLN B  61      -8.879   5.050   8.980  1.00110.00           C
ATOM   1806  C   GLN B  61      -8.754   5.140  10.489  1.00110.00           C
ATOM   1807  O   GLN B  61      -8.093   4.309  11.107  1.00110.00           O
ATOM   1808  N   MET B  62      -9.428   6.163  11.027  1.00110.00           N
ATOM   1809  CA  MET B  62      -9.540   6.463  12.451  1.00110.00           C
ATOM   1810  C   MET B  62      -8.134   6.594  13.054  1.00110.00           C
ATOM   1811  O   MET B  62      -7.876   6.183  14.184  1.00110.00           O
ATOM   1812  N   GLY B  63      -7.207   7.136  12.257  1.00110.00           N
ATOM   1813  CA  GLY B  63      -5.816   7.218  12.516  1.00110.00           C
ATOM   1814  C   GLY B  63      -5.113   5.942  12.561  1.00110.00           C
ATOM   1815  O   GLY B  63      -5.361   5.023  11.781  1.00110.00           O
ATOM   1816  N   PRO B  87      -4.235   5.838  13.563  1.00110.00           N
ATOM   1817  CA  PRO B  87      -3.560   4.638  14.041  1.00110.00           C
ATOM   1818  C   PRO B  87      -4.495   3.532  14.561  1.00110.00           C
ATOM   1819  O   PRO B  87      -4.302   3.039  15.672  1.00110.00           O
ATOM   1820  N   ALA B  88      -5.493   3.135  13.768  1.00110.00           N
ATOM   1821  CA  ALA B  88      -6.439   2.071  14.110  1.00110.00           C
ATOM   1822  C   ALA B  88      -7.015   1.455  12.830  1.00110.00           C
ATOM   1823  O   ALA B  88      -8.206   1.571  12.545  1.00110.00           O
ATOM   1824  N   TYR B  89      -6.140   0.810  12.063  1.00110.00           N
ATOM   1825  CA  TYR B  89      -6.441   0.210  10.772  1.00110.00           C
ATOM   1826  C   TYR B  89      -6.234  -1.305  10.817  1.00110.00           C
ATOM   1827  O   TYR B  89      -5.759  -1.839  11.820  1.00110.00           O
ATOM   1828  CB  TYR B  89      -5.487   0.852   9.723  1.00110.00           C
ATOM   1829  CG  TYR B  89      -4.268   1.650  10.163  1.00110.00           C
ATOM   1830  CD1 TYR B  89      -3.285   1.112  11.001  1.00110.00           C
ATOM   1831  CD2 TYR B  89      -4.113   2.974   9.719  1.00110.00           C
ATOM   1832  CE1 TYR B  89      -2.240   1.911  11.466  1.00110.00           C
ATOM   1833  CE2 TYR B  89      -3.023   3.747  10.113  1.00110.00           C
ATOM   1834  CZ  TYR B  89      -2.102   3.214  10.999  1.00110.00           C
ATOM   1835  OH  TYR B  89      -1.082   4.018  11.414  1.00110.00           O
ATOM   1836  N   GLY B  90      -6.595  -2.034   9.744  1.00 30.00           N
ATOM   1837  CA  GLY B  90      -6.500  -3.481   9.767  1.00 30.00           C
ATOM   1838  C   GLY B  90      -6.657  -4.106   8.384  1.00 30.00           C
ATOM   1839  O   GLY B  90      -7.146  -3.541   7.417  1.00 30.00           O
ATOM   1840  N   LYS B  91      -6.157  -5.328   8.338  1.00 30.00           N
ATOM   1841  CA  LYS B  91      -6.280  -6.146   7.144  1.00 30.00           C
ATOM   1842  C   LYS B  91      -7.702  -6.702   7.215  1.00 30.00           C
ATOM   1843  O   LYS B  91      -8.072  -7.286   8.243  1.00 30.00           O
ATOM   1844  CB  LYS B  91      -5.237  -7.288   7.102  1.00 30.00           C
ATOM   1845  CG  LYS B  91      -4.757  -7.792   8.477  1.00110.00           C
ATOM   1846  CD  LYS B  91      -3.912  -9.063   8.421  1.00110.00           C
ATOM   1847  CE  LYS B  91      -4.770 -10.298   8.210  1.00110.00           C
ATOM   1848  NZ  LYS B  91      -3.920 -11.505   8.193  1.00110.00           N1+
ATOM   1849  N   HIS B  92      -8.445  -6.593   6.140  1.00 30.00           N
ATOM   1850  CA  HIS B  92      -9.804  -7.152   6.149  1.00 30.00           C
ATOM   1851  C   HIS B  92      -9.798  -8.567   5.586  1.00 30.00           C
ATOM   1852  O   HIS B  92     -10.436  -9.491   6.086  1.00 30.00           O
ATOM   1853  CB  HIS B  92     -10.704  -6.241   5.279  1.00 30.00           C
ATOM   1854  CG  HIS B  92     -12.159  -6.312   5.615  1.00110.00           C
ATOM   1855  ND1 HIS B  92     -12.696  -5.733   6.742  1.00110.00           N
ATOM   1856  CD2 HIS B  92     -13.239  -6.845   4.945  1.00110.00           C
ATOM   1857  CE1 HIS B  92     -14.046  -5.949   6.708  1.00110.00           C
ATOM   1858  NE2 HIS B  92     -14.404  -6.621   5.636  1.00110.00           N
ATOM   1859  N   MET B  93      -9.071  -8.763   4.492  1.00 30.00           N
ATOM   1860  CA  MET B  93      -8.974 -10.008   3.768  1.00 30.00           C
ATOM   1861  C   MET B  93      -7.524 -10.338   3.409  1.00 30.00           C
ATOM   1862  O   MET B  93      -6.778  -9.429   3.059  1.00 30.00           O
ATOM   1863  N   GLN B  94      -7.163 -11.609   3.501  1.00 30.00           N
ATOM   1864  CA  GLN B  94      -5.813 -12.056   3.106  1.00 30.00           C
ATOM   1865  C   GLN B  94      -5.904 -13.576   2.883  1.00 30.00           C
ATOM   1866  O   GLN B  94      -5.932 -14.348   3.832  1.00 30.00           O
ATOM   1867  N   ASP B  95      -6.010 -13.992   1.622  1.00 30.00           N
ATOM   1868  CA  ASP B  95      -6.136 -15.391   1.285  1.00 30.00           C
ATOM   1869  C   ASP B  95      -5.589 -15.691  -0.103  1.00 30.00           C
ATOM   1870  O   ASP B  95      -5.475 -14.797  -0.928  1.00 30.00           O
ATOM   1871  N   ALA B  96      -5.284 -16.976  -0.293  1.00 30.00           N
ATOM   1872  CA  ALA B  96      -4.814 -17.445  -1.591  1.00 30.00           C
ATOM   1873  C   ALA B  96      -5.553 -18.773  -1.843  1.00 30.00           C
ATOM   1874  O   ALA B  96      -5.953 -19.465  -0.897  1.00 30.00           O
ATOM   1875  N   GLU B  97      -5.758 -19.114  -3.109  1.00 30.00           N
ATOM   1876  CA  GLU B  97      -6.444 -20.335  -3.433  1.00 30.00           C
ATOM   1877  C   GLU B  97      -6.211 -20.799  -4.873  1.00 30.00           C
ATOM   1878  O   GLU B  97      -5.514 -20.179  -5.667  1.00 30.00           O
ATOM   1879  N   MET B  98      -6.884 -21.902  -5.168  1.00 30.00           N
ATOM   1880  CA  MET B  98      -6.819 -22.538  -6.474  1.00 30.00           C
ATOM   1881  C   MET B  98      -8.235 -22.873  -6.930  1.00 30.00           C
ATOM   1882  O   MET B  98      -9.074 -23.269  -6.117  1.00 30.00           O
ATOM   1883  N   PHE B  99      -8.502 -22.714  -8.210  1.00 30.00           N
ATOM   1884  CA  PHE B  99      -9.798 -23.032  -8.788  1.00 30.00           C
ATOM   1885  C   PHE B  99      -9.549 -24.010  -9.943  1.00 30.00           C
ATOM   1886  O   PHE B  99      -8.704 -23.796 -10.813  1.00 30.00           O
ATOM   1887  CB  PHE B  99     -10.500 -21.736  -9.238  1.00 30.00           C
ATOM   1888  CG  PHE B  99     -11.723 -21.836 -10.123  1.00110.00           C
ATOM   1889  CD1 PHE B  99     -12.697 -22.826  -9.965  1.00110.00           C
ATOM   1890  CD2 PHE B  99     -11.924 -20.861 -11.112  1.00110.00           C
ATOM   1891  CE1 PHE B  99     -13.800 -22.886 -10.819  1.00110.00           C
ATOM   1892  CE2 PHE B  99     -13.023 -20.917 -11.968  1.00110.00           C
ATOM   1893  CZ  PHE B  99     -13.954 -21.940 -11.829  1.00110.00           C
ATOM   1894  N   THR B 100     -10.240 -25.150  -9.927  1.00 30.00           N
ATOM   1895  CA  THR B 100     -10.001 -26.160 -10.940  1.00 30.00           C
ATOM   1896  C   THR B 100     -11.252 -26.552 -11.694  1.00 30.00           C
ATOM   1897  O   THR B 100     -12.136 -27.176 -11.109  1.00 30.00           O
ATOM   1898  N   ASN B 101     -11.362 -26.143 -12.995  1.00 30.00           N
ATOM   1899  CA  ASN B 101     -12.335 -26.686 -13.942  1.00 30.00           C
ATOM   1900  C   ASN B 101     -13.768 -26.504 -13.390  1.00 30.00           C
ATOM   1901  O   ASN B 101     -14.208 -25.397 -13.063  1.00 30.00           O
ATOM   1902  N   ALA B 102     -14.484 -27.664 -13.208  1.00 30.00           N
ATOM   1903  CA  ALA B 102     -15.764 -27.718 -12.517  1.00 30.00           C
ATOM   1904  C   ALA B 102     -15.663 -28.476 -11.199  1.00 30.00           C
ATOM   1905  O   ALA B 102     -16.699 -28.856 -10.646  1.00 30.00           O
ATOM   1906  N   ALA B 103     -14.473 -28.785 -10.724  1.00 30.00           N
ATOM   1907  CA  ALA B 103     -14.294 -29.517  -9.468  1.00 30.00           C
ATOM   1908  C   ALA B 103     -14.475 -28.631  -8.248  1.00 30.00           C
ATOM   1909  O   ALA B 103     -14.808 -29.094  -7.155  1.00 30.00           O
ATOM   1910  N   TYR B 104     -14.242 -27.333  -8.411  1.00 30.00           N
ATOM   1911  CA  TYR B 104     -14.379 -26.357  -7.354  1.00 30.00           C
ATOM   1912  C   TYR B 104     -13.132 -25.509  -7.105  1.00 30.00           C
ATOM   1913  O   TYR B 104     -12.081 -25.590  -7.737  1.00 30.00           O
ATOM   1914  CB  TYR B 104     -14.651 -27.006  -5.891  1.00 30.00           C
ATOM   1915  CG  TYR B 104     -13.569 -27.801  -5.135  1.00110.00           C
ATOM   1916  CD1 TYR B 104     -12.311 -28.140  -5.658  1.00110.00           C
ATOM   1917  CD2 TYR B 104     -13.872 -28.235  -3.831  1.00110.00           C
ATOM   1918  CE1 TYR B 104     -11.381 -28.854  -4.896  1.00110.00           C
ATOM   1919  CE2 TYR B 104     -12.949 -28.959  -3.070  1.00110.00           C
ATOM   1920  CZ  TYR B 104     -11.704 -29.255  -3.607  1.00110.00           C
ATOM   1921  OH  TYR B 104     -10.767 -29.948  -2.897  1.00110.00           O
ATOM   1922  N   MET B 105     -13.262 -24.672  -6.091  1.00 30.00           N
ATOM   1923  CA  MET B 105     -12.178 -23.811  -5.630  1.00 30.00           C
ATOM   1924  C   MET B 105     -11.920 -24.088  -4.156  1.00 30.00           C
ATOM   1925  O   MET B 105     -12.750 -24.577  -3.401  1.00 30.00           O
ATOM   1926  N   ALA B 106     -10.690 -23.849  -3.764  1.00 30.00           N
ATOM   1927  CA  ALA B 106     -10.264 -23.993  -2.386  1.00 30.00           C
ATOM   1928  C   ALA B 106      -9.364 -22.806  -2.060  1.00 30.00           C
ATOM   1929  O   ALA B 106      -8.434 -22.560  -2.848  1.00 30.00           O
ATOM   1930  N   LEU B 107      -9.630 -22.146  -0.933  1.00 30.00           N
ATOM   1931  CA  LEU B 107      -8.764 -21.044  -0.532  1.00 30.00           C
ATOM   1932  C   LEU B 107      -8.603 -21.104   0.981  1.00 30.00           C
ATOM   1933  O   LEU B 107      -9.367 -21.772   1.673  1.00 30.00           O
ATOM   1934  N   ASN B 108      -7.536 -20.485   1.476  1.00 30.00           N
ATOM   1935  CA  ASN B 108      -7.268 -20.479   2.899  1.00 30.00           C
ATOM   1936  C   ASN B 108      -6.738 -19.087   3.266  1.00 30.00           C
ATOM   1937  O   ASN B 108      -6.007 -18.475   2.489  1.00 30.00           O
ATOM   1938  N   ILE B 109      -7.093 -18.608   4.451  1.00 30.00           N
ATOM   1939  CA  ILE B 109      -6.616 -17.343   4.967  1.00 30.00           C
ATOM   1940  C   ILE B 109      -7.716 -16.584   5.703  1.00 30.00           C
ATOM   1941  O   ILE B 109      -8.605 -17.195   6.298  1.00 30.00           O
ATOM   1942  N   TRP B 110      -7.619 -15.251   5.687  1.00 30.00           N
ATOM   1943  CA  TRP B 110      -8.630 -14.409   6.298  1.00 30.00           C
ATOM   1944  C   TRP B 110      -9.671 -14.153   5.195  1.00 30.00           C
ATOM   1945  O   TRP B 110      -9.346 -13.539   4.185  1.00 30.00           O
ATOM   1946  CB  TRP B 110      -8.090 -13.083   6.857  1.00 30.00           C
ATOM   1947  CG  TRP B 110      -9.039 -12.400   7.817  1.00110.00           C
ATOM   1948  CD1 TRP B 110     -10.366 -12.087   7.588  1.00110.00           C
ATOM   1949  CD2 TRP B 110      -8.750 -11.935   9.145  1.00110.00           C
ATOM   1950  NE1 TRP B 110     -10.879 -11.469   8.698  1.00110.00           N
ATOM   1951  CE3 TRP B 110      -7.605 -11.945   9.962  1.00110.00           C
ATOM   1952  CE2 TRP B 110      -9.911 -11.360   9.664  1.00110.00           C
ATOM   1953  CZ3 TRP B 110      -7.654 -11.389  11.247  1.00110.00           C
ATOM   1954  CZ2 TRP B 110      -9.987 -10.809  10.949  1.00110.00           C
ATOM   1955  CH2 TRP B 110      -8.833 -10.833  11.734  1.00110.00           C
ATOM   1956  N   ASP B 111     -10.874 -14.647   5.411  1.00 30.00           N
ATOM   1957  CA  ASP B 111     -11.937 -14.536   4.413  1.00 30.00           C
ATOM   1958  C   ASP B 111     -13.289 -14.475   5.109  1.00 30.00           C
ATOM   1959  O   ASP B 111     -13.395 -14.421   6.339  1.00 30.00           O
ATOM   1960  N   ARG B 112     -13.406 -13.615   4.541  1.00 30.00           N
ATOM   1961  CA  ARG B 112     -14.767 -13.705   5.051  1.00 30.00           C
ATOM   1962  C   ARG B 112     -15.004 -15.212   5.074  1.00 30.00           C
ATOM   1963  O   ARG B 112     -14.498 -15.928   4.209  1.00 30.00           O
ATOM   1964  CB  ARG B 112     -15.710 -13.114   3.971  1.00 30.00           C
ATOM   1965  CG  ARG B 112     -15.573 -11.606   3.713  1.00110.00           C
ATOM   1966  CD  ARG B 112     -15.720 -10.727   4.952  1.00110.00           C
ATOM   1967  NE  ARG B 112     -14.436 -10.542   5.641  1.00110.00           N
ATOM   1968  CZ  ARG B 112     -14.288  -9.823   6.770  1.00110.00           C
ATOM   1969  NH1 ARG B 112     -15.341  -9.374   7.457  1.00110.00           N
ATOM   1970  NH2 ARG B 112     -13.062  -9.553   7.229  1.00110.00           N1+
ATOM   1971  N   PHE B 113     -17.239 -18.523   4.486  1.00 30.00           N1+
ATOM   1972  CA  PHE B 113     -18.290 -18.773   3.489  1.00 30.00           C
ATOM   1973  C   PHE B 113     -19.700 -18.311   3.843  1.00 30.00           C
ATOM   1974  O   PHE B 113     -20.397 -17.728   3.005  1.00 30.00           O
ATOM   1975  CB  PHE B 113     -18.142 -20.113   2.790  1.00 30.00           C
ATOM   1976  CG  PHE B 113     -17.289 -19.932   1.530  1.00110.00           C
ATOM   1977  CD1 PHE B 113     -17.509 -18.890   0.593  1.00110.00           C
ATOM   1978  CD2 PHE B 113     -16.311 -20.867   1.226  1.00110.00           C
ATOM   1979  CE1 PHE B 113     -16.681 -18.700  -0.508  1.00110.00           C
ATOM   1980  CE2 PHE B 113     -15.555 -20.729   0.059  1.00110.00           C
ATOM   1981  CZ  PHE B 113     -15.677 -19.611  -0.755  1.00110.00           C
ATOM   1982  N   ASP B 114     -20.147 -18.510   5.086  1.00110.00           N
ATOM   1983  CA  ASP B 114     -21.480 -18.119   5.540  1.00110.00           C
ATOM   1984  C   ASP B 114     -21.694 -16.610   5.302  1.00110.00           C
ATOM   1985  O   ASP B 114     -22.525 -16.198   4.489  1.00110.00           O
ATOM   1986  N   VAL B 115     -20.877 -15.788   5.956  1.00110.00           N
ATOM   1987  CA  VAL B 115     -20.901 -14.336   5.828  1.00110.00           C
ATOM   1988  C   VAL B 115     -19.894 -13.890   4.762  1.00110.00           C
ATOM   1989  O   VAL B 115     -18.992 -13.098   5.019  1.00110.00           O
ATOM   1990  N   PHE B 116     -20.101 -14.389   3.547  1.00110.00           N
ATOM   1991  CA  PHE B 116     -19.432 -13.984   2.344  1.00110.00           C
ATOM   1992  C   PHE B 116     -20.664 -13.999   1.439  1.00110.00           C
ATOM   1993  O   PHE B 116     -20.994 -13.009   0.782  1.00110.00           O
ATOM   1994  CB  PHE B 116     -18.367 -14.951   1.822  1.00110.00           C
ATOM   1995  CG  PHE B 116     -17.813 -14.531   0.472  1.00110.00           C
ATOM   1996  CD1 PHE B 116     -16.966 -13.421   0.347  1.00110.00           C
ATOM   1997  CD2 PHE B 116     -18.172 -15.225  -0.692  1.00110.00           C
ATOM   1998  CE1 PHE B 116     -16.474 -13.030  -0.900  1.00110.00           C
ATOM   1999  CE2 PHE B 116     -17.682 -14.835  -1.941  1.00110.00           C
ATOM   2000  CZ  PHE B 116     -16.830 -13.738  -2.045  1.00110.00           C
ATOM   2001  N   CYS B 117     -21.420 -15.100   1.518  1.00 30.00           N
ATOM   2002  CA  CYS B 117     -22.613 -15.312   0.715  1.00 30.00           C
ATOM   2003  C   CYS B 117     -23.849 -14.594   1.248  1.00 30.00           C
ATOM   2004  O   CYS B 117     -24.536 -13.894   0.510  1.00 30.00           O
ATOM   2005  CB  CYS B 117     -22.834 -16.796   0.462  1.00 30.00           C
ATOM   2006  SG  CYS B 117     -21.371 -17.719  -0.156  1.00110.00           S
ATOM   2007  N   THR B 118     -24.112 -14.746   2.539  1.00 30.00           N
ATOM   2008  CA  THR B 118     -25.307 -14.165   3.138  1.00 30.00           C
ATOM   2009  C   THR B 118     -25.406 -12.654   3.309  1.00 30.00           C
ATOM   2010  O   THR B 118     -26.515 -12.121   3.388  1.00 30.00           O
ATOM   2011  N   LEU B 119     -24.275 -11.950   3.364  1.00 30.00           N
ATOM   2012  CA  LEU B 119     -24.335 -10.497   3.500  1.00 30.00           C
ATOM   2013  C   LEU B 119     -24.717  -9.866   2.157  1.00 30.00           C
ATOM   2014  O   LEU B 119     -25.012  -8.675   2.081  1.00 30.00           O
ATOM   2015  N   GLY B 120     -24.725 -10.671   1.098  1.00 30.00           N
ATOM   2016  CA  GLY B 120     -25.087 -10.158  -0.218  1.00 30.00           C
ATOM   2017  C   GLY B 120     -26.565  -9.768  -0.269  1.00 30.00           C
ATOM   2018  O   GLY B 120     -26.992  -9.072  -1.188  1.00 30.00           O
ATOM   2019  N   ALA B 121     -27.344 -10.204   0.719  1.00 30.00           N
ATOM   2020  CA  ALA B 121     -28.771  -9.872   0.756  1.00 30.00           C
ATOM   2021  C   ALA B 121     -29.031  -8.559   1.501  1.00 30.00           C
ATOM   2022  O   ALA B 121     -30.153  -8.065   1.546  1.00 30.00           O
ATOM   2023  N   THR B 122     -27.975  -7.995   2.076  1.00 30.00           N
ATOM   2024  CA  THR B 122     -28.067  -6.737   2.801  1.00 30.00           C
ATOM   2025  C   THR B 122     -27.959  -5.643   1.740  1.00 30.00           C
ATOM   2026  O   THR B 122     -26.920  -5.498   1.106  1.00 30.00           O
ATOM   2027  N   THR B 123     -29.024  -4.880   1.536  1.00 30.00           N
ATOM   2028  CA  THR B 123     -28.998  -3.824   0.525  1.00 30.00           C
ATOM   2029  C   THR B 123     -27.995  -2.726   0.845  1.00 30.00           C
ATOM   2030  O   THR B 123     -27.639  -1.939  -0.030  1.00 30.00           O
ATOM   2031  N   GLY B 124     -27.537  -2.660   2.093  1.00 30.00           N
ATOM   2032  CA  GLY B 124     -26.559  -1.645   2.466  1.00 30.00           C
ATOM   2033  C   GLY B 124     -25.136  -2.182   2.615  1.00 30.00           C
ATOM   2034  O   GLY B 124     -24.275  -1.563   3.238  1.00 30.00           O
ATOM   2035  N   TYR B 125     -24.908  -3.344   2.017  1.00 30.00           N
ATOM   2036  CA  TYR B 125     -23.605  -3.991   1.977  1.00 30.00           C
ATOM   2037  C   TYR B 125     -22.796  -4.049   3.266  1.00 30.00           C
ATOM   2038  O   TYR B 125     -21.589  -3.788   3.257  1.00 30.00           O
ATOM   2039  CB  TYR B 125     -22.757  -3.376   0.830  1.00 30.00           C
ATOM   2040  CG  TYR B 125     -23.409  -3.533  -0.532  1.00110.00           C
ATOM   2041  CD1 TYR B 125     -23.334  -4.755  -1.216  1.00110.00           C
ATOM   2042  CD2 TYR B 125     -24.132  -2.475  -1.102  1.00110.00           C
ATOM   2043  CE1 TYR B 125     -23.975  -4.916  -2.446  1.00110.00           C
ATOM   2044  CE2 TYR B 125     -24.774  -2.635  -2.332  1.00110.00           C
ATOM   2045  CZ  TYR B 125     -24.691  -3.857  -2.993  1.00110.00           C
ATOM   2046  OH  TYR B 125     -25.310  -4.058  -4.194  1.00110.00           O
ATOM   2047  N   LEU B 126     -23.454  -4.401   4.366  1.00 30.00           N
ATOM   2048  CA  LEU B 126     -22.791  -4.534   5.659  1.00 30.00           C
ATOM   2049  C   LEU B 126     -21.892  -3.361   6.053  1.00 30.00           C
ATOM   2050  O   LEU B 126     -20.873  -3.559   6.711  1.00 30.00           O
ATOM   2051  N   LYS B 127     -22.254  -2.148   5.649  1.00 30.00           N
ATOM   2052  CA  LYS B 127     -21.456  -0.977   6.006  1.00 30.00           C
ATOM   2053  C   LYS B 127     -22.369   0.243   6.147  1.00 30.00           C
ATOM   2054  O   LYS B 127     -23.539   0.195   5.761  1.00 30.00           O
ATOM   2055  CB  LYS B 127     -20.307  -0.740   5.008  1.00 30.00           C
ATOM   2056  CG  LYS B 127     -20.746  -0.358   3.589  1.00110.00           C
ATOM   2057  CD  LYS B 127     -19.537  -0.319   2.648  1.00110.00           C
ATOM   2058  CE  LYS B 127     -19.923   0.118   1.242  1.00110.00           C
ATOM   2059  NZ  LYS B 127     -18.721   0.106   0.381  1.00110.00           N1+
ATOM   2060  N   GLY B 128     -21.839   1.326   6.706  1.00 30.00           N
ATOM   2061  CA  GLY B 128     -22.639   2.526   6.874  1.00 30.00           C
ATOM   2062  C   GLY B 128     -23.416   2.517   8.177  1.00 30.00           C
ATOM   2063  O   GLY B 128     -23.348   1.546   8.931  1.00 30.00           O
ATOM   2064  N   ASN B 129     -24.160   3.591   8.433  1.00 30.00           N
ATOM   2065  CA  ASN B 129     -24.949   3.727   9.663  1.00 30.00           C
ATOM   2066  C   ASN B 129     -26.011   2.677   9.910  1.00 30.00           C
ATOM   2067  O   ASN B 129     -26.250   2.311  11.058  1.00 30.00           O
ATOM   2068  N   SER B 130     -26.660   2.198   8.857  1.00 30.00           N
ATOM   2069  CA  SER B 130     -27.714   1.221   9.066  1.00 30.00           C
ATOM   2070  C   SER B 130     -27.744  -0.048   8.236  1.00 30.00           C
ATOM   2071  O   SER B 130     -28.698  -0.276   7.499  1.00 30.00           O
ATOM   2072  N   ALA B 131     -26.710  -0.896   8.319  1.00 30.00           N
ATOM   2073  CA  ALA B 131     -26.752  -2.129   7.526  1.00 30.00           C
ATOM   2074  C   ALA B 131     -27.443  -3.190   8.382  1.00 30.00           C
ATOM   2075  O   ALA B 131     -27.954  -2.886   9.460  1.00 30.00           O
ATOM   2076  N   SER B 132     -27.465  -4.427   7.904  1.00 30.00           N
ATOM   2077  CA  SER B 132     -28.044  -5.518   8.680  1.00 30.00           C
ATOM   2078  C   SER B 132     -27.027  -5.810   9.786  1.00 30.00           C
ATOM   2079  O   SER B 132     -25.865  -6.101   9.494  1.00 30.00           O
ATOM   2080  N   PHE B 133     -27.456  -5.745  11.043  1.00 30.00           N
ATOM   2081  CA  PHE B 133     -26.558  -5.968  12.177  1.00 30.00           C
ATOM   2082  C   PHE B 133     -26.565  -7.362  12.808  1.00 30.00           C
ATOM   2083  O   PHE B 133     -26.056  -7.542  13.915  1.00 30.00           O
ATOM   2084  CB  PHE B 133     -26.808  -4.889  13.266  1.00 30.00           C
ATOM   2085  CG  PHE B 133     -26.309  -3.501  12.899  1.00110.00           C
ATOM   2086  CD1 PHE B 133     -24.957  -3.274  12.596  1.00110.00           C
ATOM   2087  CD2 PHE B 133     -27.184  -2.408  12.913  1.00110.00           C
ATOM   2088  CE1 PHE B 133     -24.502  -1.992  12.278  1.00110.00           C
ATOM   2089  CE2 PHE B 133     -26.727  -1.124  12.604  1.00110.00           C
ATOM   2090  CZ  PHE B 133     -25.388  -0.918  12.280  1.00110.00           C
ATOM   2091  N   ASN B 134     -27.126  -8.347  12.109  1.00 30.00           N
ATOM   2092  CA  ASN B 134     -27.168  -9.694  12.649  1.00 30.00           C
ATOM   2093  C   ASN B 134     -25.797 -10.300  12.905  1.00 30.00           C
ATOM   2094  O   ASN B 134     -25.612 -11.077  13.846  1.00 30.00           O
ATOM   2095  N   LEU B 135     -24.832  -9.960  12.058  1.00 30.00           N
ATOM   2096  CA  LEU B 135     -23.479 -10.474  12.209  1.00 30.00           C
ATOM   2097  C   LEU B 135     -22.701  -9.639  13.224  1.00 30.00           C
ATOM   2098  O   LEU B 135     -21.959  -8.728  12.859  1.00 30.00           O
ATOM   2099  N   VAL B 136     -22.903  -9.931  14.505  1.00 30.00           N
ATOM   2100  CA  VAL B 136     -22.185  -9.218  15.547  1.00 30.00           C
ATOM   2101  C   VAL B 136     -22.011 -10.098  16.772  1.00 30.00           C
ATOM   2102  O   VAL B 136     -22.621 -11.167  16.879  1.00 30.00           O
ATOM   2103  N   GLY B 137     -21.153  -9.644  17.677  1.00 30.00           N
ATOM   2104  CA  GLY B 137     -20.826 -10.365  18.903  1.00 30.00           C
ATOM   2105  C   GLY B 137     -21.900 -10.084  19.955  1.00 30.00           C
ATOM   2106  O   GLY B 137     -21.678  -9.306  20.866  1.00 30.00           O
ATOM   2107  N   LEU B 138     -23.055 -10.733  19.830  1.00 30.00           N
ATOM   2108  CA  LEU B 138     -24.162 -10.513  20.760  1.00 30.00           C
ATOM   2109  C   LEU B 138     -23.894 -10.890  22.209  1.00 30.00           C
ATOM   2110  O   LEU B 138     -24.449 -10.278  23.125  1.00 30.00           O
ATOM   2111  N   PHE B 139     -23.056 -11.899  22.426  1.00 30.00           N
ATOM   2112  CA  PHE B 139     -22.781 -12.362  23.784  1.00 30.00           C
ATOM   2113  C   PHE B 139     -21.511 -11.815  24.417  1.00 30.00           C
ATOM   2114  O   PHE B 139     -21.128 -12.242  25.501  1.00 30.00           O
ATOM   2115  CB  PHE B 139     -22.624 -13.907  23.790  1.00 30.00           C
ATOM   2116  CG  PHE B 139     -23.920 -14.675  23.703  1.00110.00           C
ATOM   2117  CD1 PHE B 139     -24.572 -15.097  24.871  1.00110.00           C
ATOM   2118  CD2 PHE B 139     -24.460 -15.017  22.461  1.00110.00           C
ATOM   2119  CE1 PHE B 139     -25.746 -15.847  24.795  1.00110.00           C
ATOM   2120  CE2 PHE B 139     -25.618 -15.789  22.387  1.00110.00           C
ATOM   2121  CZ  PHE B 139     -26.269 -16.192  23.551  1.00110.00           C
ATOM   2122  N   GLY B 137     -20.865 -10.863  23.757  1.00 30.00           N
ATOM   2123  CA  GLY B 137     -19.627 -10.310  24.291  1.00 30.00           C
ATOM   2124  C   GLY B 137     -18.613 -11.443  24.408  1.00 30.00           C
ATOM   2125  O   GLY B 137     -17.885 -11.554  25.399  1.00 30.00           O
ATOM   2126  N   THR B 141     -18.540 -12.350  23.418  1.00110.00           N
ATOM   2127  CA  THR B 141     -17.588 -13.450  23.353  1.00110.00           C
ATOM   2128  C   THR B 141     -16.183 -12.870  23.096  1.00110.00           C
ATOM   2129  O   THR B 141     -15.693 -12.840  21.968  1.00110.00           O
ATOM   2130  N   LYS B 142     -15.574 -12.381  24.174  1.00110.00           N
ATOM   2131  CA  LYS B 142     -14.419 -11.587  24.215  1.00110.00           C
ATOM   2132  C   LYS B 142     -13.047 -12.177  23.887  1.00110.00           C
ATOM   2133  O   LYS B 142     -12.249 -11.459  23.287  1.00110.00           O
ATOM   2134  CB  LYS B 142     -14.288 -10.917  25.620  1.00110.00           C
ATOM   2135  CG  LYS B 142     -14.078 -11.879  26.799  1.00110.00           C
ATOM   2136  CD  LYS B 142     -14.120 -11.129  28.135  1.00110.00           C
ATOM   2137  CE  LYS B 142     -13.890 -12.070  29.312  1.00110.00           C
ATOM   2138  NZ  LYS B 142     -13.938 -11.301  30.572  1.00110.00           N1+
ATOM   2139  N   THR B 143     -12.767 -13.438  24.232  1.00110.00           N
ATOM   2140  CA  THR B 143     -11.510 -14.116  23.935  1.00110.00           C
ATOM   2141  C   THR B 143     -11.541 -14.613  22.481  1.00110.00           C
ATOM   2142  O   THR B 143     -10.549 -15.158  21.995  1.00110.00           O
ATOM   2143  N   GLN B 144     -12.672 -14.409  21.806  1.00110.00           N
ATOM   2144  CA  GLN B 144     -12.844 -14.683  20.397  1.00110.00           C
ATOM   2145  C   GLN B 144     -12.614 -13.386  19.630  1.00110.00           C
ATOM   2146  O   GLN B 144     -13.338 -12.410  19.812  1.00110.00           O
ATOM   2147  N   SER B 145     -11.624 -13.399  18.750  1.00 30.00           N
ATOM   2148  CA  SER B 145     -11.273 -12.267  17.889  1.00 30.00           C
ATOM   2149  C   SER B 145     -12.345 -11.937  16.837  1.00 30.00           C
ATOM   2150  O   SER B 145     -12.589 -10.766  16.524  1.00 30.00           O
ATOM   2151  N   SER B 146     -12.985 -12.967  16.294  1.00 30.00           N
ATOM   2152  CA  SER B 146     -13.996 -12.755  15.272  1.00 30.00           C
ATOM   2153  C   SER B 146     -15.357 -13.313  15.654  1.00 30.00           C
ATOM   2154  O   SER B 146     -15.992 -14.008  14.867  1.00 30.00           O
ATOM   2155  N   SER B 147     -15.771 -13.064  16.904  1.00110.00           N
ATOM   2156  CA  SER B 147     -17.065 -13.458  17.425  1.00110.00           C
ATOM   2157  C   SER B 147     -18.213 -12.823  16.617  1.00110.00           C
ATOM   2158  O   SER B 147     -18.261 -11.599  16.486  1.00110.00           O
ATOM   2159  N   PRO B 155     -19.145 -13.627  16.080  1.00110.00           N
ATOM   2160  CA  PRO B 155     -19.173 -15.086  16.165  1.00110.00           C
ATOM   2161  C   PRO B 155     -18.243 -15.656  15.086  1.00110.00           C
ATOM   2162  O   PRO B 155     -18.512 -15.418  13.916  1.00110.00           O
ATOM   2163  N   ASN B 156     -17.153 -16.337  15.484  1.00110.00           N
ATOM   2164  CA  ASN B 156     -16.115 -17.035  14.629  1.00110.00           C
ATOM   2165  C   ASN B 156     -14.740 -16.531  14.028  1.00110.00           C
ATOM   2166  O   ASN B 156     -14.799 -16.041  12.908  1.00110.00           O
ATOM   2167  N   THR B 157     -13.569 -16.617  14.706  1.00110.00           N
ATOM   2168  CA  THR B 157     -12.243 -16.174  14.200  1.00110.00           C
ATOM   2169  C   THR B 157     -12.048 -16.556  12.743  1.00110.00           C
ATOM   2170  O   THR B 157     -12.157 -17.739  12.438  1.00110.00           O
ATOM   2171  N   ALA B 158     -11.782 -15.559  11.888  1.00110.00           N
ATOM   2172  CA  ALA B 158     -11.700 -15.748  10.446  1.00110.00           C
ATOM   2173  C   ALA B 158     -10.247 -16.000  10.037  1.00110.00           C
ATOM   2174  O   ALA B 158      -9.954 -16.142   8.854  1.00110.00           O
ATOM   2175  N   LEU B 159      -9.320 -16.105  10.998  1.00 30.00           N
ATOM   2176  CA  LEU B 159      -7.893 -16.335  10.782  1.00 30.00           C
ATOM   2177  C   LEU B 159      -7.726 -17.826  10.487  1.00 30.00           C
ATOM   2178  O   LEU B 159      -8.628 -18.614  10.759  1.00 30.00           O
ATOM   2179  N   ASN B 160      -6.580 -18.200   9.921  1.00 30.00           N
ATOM   2180  CA  ASN B 160      -6.267 -19.604   9.668  1.00 30.00           C
ATOM   2181  C   ASN B 160      -7.363 -20.349   8.926  1.00 30.00           C
ATOM   2182  O   ASN B 160      -7.604 -21.535   9.185  1.00 30.00           O
ATOM   2183  N   GLU B 161      -8.001 -19.669   7.982  1.00 30.00           N
ATOM   2184  CA  GLU B 161      -9.102 -20.253   7.243  1.00 30.00           C
ATOM   2185  C   GLU B 161      -8.771 -20.977   5.934  1.00 30.00           C
ATOM   2186  O   GLU B 161      -7.913 -20.548   5.155  1.00 30.00           O
ATOM   2187  N   ALA B 162      -9.458 -22.092   5.715  1.00 30.00           N
ATOM   2188  CA  ALA B 162      -9.330 -22.861   4.486  1.00 30.00           C
ATOM   2189  C   ALA B 162     -10.751 -22.977   3.963  1.00 30.00           C
ATOM   2190  O   ALA B 162     -11.630 -23.483   4.656  1.00 30.00           O
ATOM   2191  N   VAL B 163     -10.975 -22.485   2.750  1.00 30.00           N
ATOM   2192  CA  VAL B 163     -12.292 -22.527   2.133  1.00 30.00           C
ATOM   2193  C   VAL B 163     -12.341 -23.308   0.824  1.00 30.00           C
ATOM   2194  O   VAL B 163     -11.341 -23.432   0.109  1.00 30.00           O
ATOM   2195  N   VAL B 164     -13.525 -23.832   0.526  1.00 30.00           N
ATOM   2196  CA  VAL B 164     -13.760 -24.555  -0.712  1.00 30.00           C
ATOM   2197  C   VAL B 164     -15.100 -24.110  -1.279  1.00 30.00           C
ATOM   2198  O   VAL B 164     -16.125 -24.200  -0.606  1.00 30.00           O
ATOM   2199  N   GLU B 165     -15.070 -23.610  -2.508  1.00 30.00           N
ATOM   2200  CA  GLU B 165     -16.276 -23.167  -3.189  1.00 30.00           C
ATOM   2201  C   GLU B 165     -16.465 -24.026  -4.435  1.00 30.00           C
ATOM   2202  O   GLU B 165     -15.544 -24.195  -5.238  1.00 30.00           O
ATOM   2203  N   LEU B 166     -17.662 -24.577  -4.581  1.00 30.00           N
ATOM   2204  CA  LEU B 166     -17.980 -25.425  -5.720  1.00 30.00           C
ATOM   2205  C   LEU B 166     -18.256 -24.584  -6.952  1.00 30.00           C
ATOM   2206  O   LEU B 166     -18.435 -23.367  -6.867  1.00 30.00           O
ATOM   2207  N   TYR B 167     -18.259 -25.223  -8.131  1.00 30.00           N
ATOM   2208  CA  TYR B 167     -18.546 -24.449  -9.335  1.00 30.00           C
ATOM   2209  C   TYR B 167     -20.064 -24.340  -9.338  1.00 30.00           C
ATOM   2210  O   TYR B 167     -20.720 -24.904  -8.461  1.00 30.00           O
ATOM   2211  CB  TYR B 167     -18.037 -25.249 -10.557  1.00 30.00           C
ATOM   2212  CG  TYR B 167     -18.145 -24.573 -11.907  1.00110.00           C
ATOM   2213  CD1 TYR B 167     -17.558 -23.322 -12.143  1.00110.00           C
ATOM   2214  CD2 TYR B 167     -18.836 -25.203 -12.954  1.00110.00           C
ATOM   2215  CE1 TYR B 167     -17.674 -22.709 -13.392  1.00110.00           C
ATOM   2216  CE2 TYR B 167     -18.948 -24.593 -14.206  1.00110.00           C
ATOM   2217  CZ  TYR B 167     -18.365 -23.348 -14.415  1.00110.00           C
ATOM   2218  OH  TYR B 167     -18.451 -22.716 -15.621  1.00110.00           O
ATOM   2219  N   ILE B 168     -20.636 -23.624 -10.296  1.00 30.00           N
ATOM   2220  CA  ILE B 168     -22.087 -23.488 -10.333  1.00 30.00           C
ATOM   2221  C   ILE B 168     -22.701 -24.619 -11.153  1.00 30.00           C
ATOM   2222  O   ILE B 168     -22.239 -24.921 -12.256  1.00 30.00           O
ATOM   2223  N   ASN B 169     -23.738 -25.244 -10.604  1.00 30.00           N
ATOM   2224  CA  ASN B 169     -24.422 -26.354 -11.267  1.00 30.00           C
ATOM   2225  C   ASN B 169     -25.898 -26.047 -11.483  1.00 30.00           C
ATOM   2226  O   ASN B 169     -26.734 -26.355 -10.632  1.00 30.00           O
ATOM   2227  N   THR B 170     -26.214 -25.444 -12.624  1.00 30.00           N
ATOM   2228  CA  THR B 170     -27.593 -25.109 -12.930  1.00 30.00           C
ATOM   2229  C   THR B 170     -28.231 -24.283 -11.832  1.00 30.00           C
ATOM   2230  O   THR B 170     -29.337 -24.584 -11.381  1.00 30.00           O
ATOM   2231  N   THR B 171     -27.528 -23.243 -11.393  1.00 30.00           N
ATOM   2232  CA  THR B 171     -28.052 -22.388 -10.343  1.00 30.00           C
ATOM   2233  C   THR B 171     -27.545 -22.739  -8.956  1.00 30.00           C
ATOM   2234  O   THR B 171     -27.289 -21.847  -8.144  1.00 30.00           O
ATOM   2235  N   PHE B 172     -27.395 -24.035  -8.685  1.00 30.00           N
ATOM   2236  CA  PHE B 172     -26.923 -24.494  -7.383  1.00 30.00           C
ATOM   2237  C   PHE B 172     -25.428 -24.274  -7.168  1.00 30.00           C
ATOM   2238  O   PHE B 172     -24.609 -24.514  -8.058  1.00 30.00           O
ATOM   2239  CB  PHE B 172     -27.193 -25.996  -7.155  1.00 30.00           C
ATOM   2240  CG  PHE B 172     -28.660 -26.325  -6.981  1.00 30.00           C
ATOM   2241  CD1 PHE B 172     -29.284 -26.127  -5.741  1.00 30.00           C
ATOM   2242  CD2 PHE B 172     -29.412 -26.830  -8.050  1.00 30.00           C
ATOM   2243  CE1 PHE B 172     -30.633 -26.443  -5.570  1.00 30.00           C
ATOM   2244  CE2 PHE B 172     -30.762 -27.142  -7.878  1.00 30.00           C
ATOM   2245  CZ  PHE B 172     -31.371 -26.952  -6.638  1.00 30.00           C
ATOM   2246  N   ALA B 173     -25.079 -23.816  -5.972  1.00 30.00           N
ATOM   2247  CA  ALA B 173     -23.692 -23.561  -5.623  1.00 30.00           C
ATOM   2248  C   ALA B 173     -23.543 -23.596  -4.109  1.00 30.00           C
ATOM   2249  O   ALA B 173     -24.451 -23.208  -3.377  1.00 30.00           O
ATOM   2250  N   TRP B 174     -22.401 -24.086  -3.639  1.00 30.00           N
ATOM   2251  CA  TRP B 174     -22.160 -24.172  -2.204  1.00 30.00           C
ATOM   2252  C   TRP B 174     -20.725 -23.818  -1.832  1.00 30.00           C
ATOM   2253  O   TRP B 174     -19.833 -23.774  -2.683  1.00 30.00           O
ATOM   2254  CB  TRP B 174     -22.298 -25.641  -1.697  1.00 30.00           C
ATOM   2255  CG  TRP B 174     -23.425 -26.564  -2.101  1.00110.00           C
ATOM   2256  CD1 TRP B 174     -24.646 -26.321  -2.695  1.00110.00           C
ATOM   2257  CD2 TRP B 174     -23.396 -27.988  -1.852  1.00110.00           C
ATOM   2258  NE1 TRP B 174     -25.314 -27.509  -2.870  1.00110.00           N
ATOM   2259  CE3 TRP B 174     -22.467 -28.851  -1.227  1.00110.00           C
ATOM   2260  CE2 TRP B 174     -24.575 -28.542  -2.349  1.00110.00           C
ATOM   2261  CZ3 TRP B 174     -22.742 -30.220  -1.139  1.00110.00           C
ATOM   2262  CZ2 TRP B 174     -24.867 -29.909  -2.273  1.00110.00           C
ATOM   2263  CH2 TRP B 174     -23.925 -30.740  -1.658  1.00110.00           C
ATOM   2264  N   SER B 175     -20.514 -23.565  -0.549  1.00 30.00           N
ATOM   2265  CA  SER B 175     -19.193 -23.223  -0.066  1.00 30.00           C
ATOM   2266  C   SER B 175     -19.013 -23.763   1.333  1.00 30.00           C
ATOM   2267  O   SER B 175     -19.954 -23.758   2.119  1.00 30.00           O
ATOM   2268  N   VAL B 176     -17.812 -24.239   1.640  1.00 30.00           N
ATOM   2269  CA  VAL B 176     -17.529 -24.790   2.957  1.00 30.00           C
ATOM   2270  C   VAL B 176     -16.218 -24.230   3.477  1.00 30.00           C
ATOM   2271  O   VAL B 176     -15.303 -23.970   2.707  1.00 30.00           O
ATOM   2272  N   GLY B 177     -16.128 -24.051   4.787  1.00 30.00           N
ATOM   2273  CA  GLY B 177     -14.903 -23.526   5.353  1.00 30.00           C
ATOM   2274  C   GLY B 177     -14.550 -24.097   6.708  1.00 30.00           C
ATOM   2275  O   GLY B 177     -15.418 -24.554   7.452  1.00 30.00           O
ATOM   2276  N   ALA B 178     -13.260 -24.079   7.021  1.00 30.00           N
ATOM   2277  CA  ALA B 178     -12.774 -24.562   8.307  1.00 30.00           C
ATOM   2278  C   ALA B 178     -11.635 -23.659   8.770  1.00 30.00           C
ATOM   2279  O   ALA B 178     -10.711 -23.379   8.013  1.00 30.00           O
ATOM   2280  N   ARG B 179     -11.707 -23.197  10.011  1.00 30.00           N
ATOM   2281  CA  ARG B 179     -10.652 -22.351  10.549  1.00 30.00           C
ATOM   2282  C   ARG B 179     -10.050 -23.021  11.774  1.00 30.00           C
ATOM   2283  O   ARG B 179     -10.770 -23.386  12.710  1.00 30.00           O
ATOM   2284  CB  ARG B 179     -11.236 -21.007  10.952  1.00 30.00           C
ATOM   2285  CG  ARG B 179     -11.764 -20.277   9.724  1.00110.00           C
ATOM   2286  CD  ARG B 179     -12.392 -18.973  10.097  1.00110.00           C
ATOM   2287  NE  ARG B 179     -13.154 -18.326   9.033  1.00110.00           N
ATOM   2288  CZ  ARG B 179     -14.366 -17.752   9.140  1.00110.00           C
ATOM   2289  NH1 ARG B 179     -14.967 -17.601  10.309  1.00110.00           N
ATOM   2290  NH2 ARG B 179     -14.961 -17.289   8.046  1.00110.00           N1+
ATOM   2291  N   ALA B 180      -8.731 -23.183  11.754  1.00 30.00           N
ATOM   2292  CA  ALA B 180      -8.020 -23.808  12.854  1.00 30.00           C
ATOM   2293  C   ALA B 180      -7.952 -22.906  14.075  1.00 30.00           C
ATOM   2294  O   ALA B 180      -7.612 -21.728  13.973  1.00 30.00           O
ATOM   2295  N   ALA B 181      -8.272 -23.468  15.236  1.00 30.00           N
ATOM   2296  CA  ALA B 181      -8.224 -22.713  16.479  1.00 30.00           C
ATOM   2297  C   ALA B 181      -6.775 -22.578  16.934  1.00 30.00           C
ATOM   2298  O   ALA B 181      -6.413 -21.606  17.602  1.00 30.00           O
ATOM   2299  N   LEU B 182      -5.956 -23.564  16.566  1.00 30.00           N
ATOM   2300  CA  LEU B 182      -4.538 -23.595  16.923  1.00 30.00           C
ATOM   2301  C   LEU B 182      -4.324 -23.523  18.438  1.00 30.00           C
ATOM   2302  O   LEU B 182      -3.346 -22.951  18.933  1.00 30.00           O
ATOM   2303  N   TRP B 183      -5.278 -24.065  19.212  1.00110.00           N
ATOM   2304  CA  TRP B 183      -5.282 -24.164  20.669  1.00110.00           C
ATOM   2305  C   TRP B 183      -4.913 -22.813  21.329  1.00110.00           C
ATOM   2306  O   TRP B 183      -4.372 -22.777  22.434  1.00110.00           O
ATOM   2307  CB  TRP B 183      -4.300 -25.253  21.160  1.00110.00           C
ATOM   2308  CG  TRP B 183      -4.559 -26.606  20.556  1.00110.00           C
ATOM   2309  CD1 TRP B 183      -5.521 -27.513  20.956  1.00110.00           C
ATOM   2310  CD2 TRP B 183      -3.866 -27.198  19.451  1.00110.00           C
ATOM   2311  NE1 TRP B 183      -5.451 -28.613  20.140  1.00110.00           N
ATOM   2312  CE3 TRP B 183      -2.797 -26.786  18.627  1.00110.00           C
ATOM   2313  CE2 TRP B 183      -4.453 -28.441  19.207  1.00110.00           C
ATOM   2314  CZ3 TRP B 183      -2.367 -27.619  17.588  1.00110.00           C
ATOM   2315  CZ2 TRP B 183      -4.029 -29.289  18.176  1.00110.00           C
ATOM   2316  CH2 TRP B 183      -2.976 -28.852  17.368  1.00110.00           C
ATOM   2317  N   GLU B 184      -5.199 -21.708  20.628  1.00110.00           N
ATOM   2318  CA  GLU B 184      -4.965 -20.295  21.036  1.00110.00           C
ATOM   2319  C   GLU B 184      -6.444 -19.914  21.481  1.00110.00           C
ATOM   2320  O   GLU B 184      -7.111 -19.087  20.859  1.00110.00           O
ATOM   2321  N   CYS B 185      -6.917 -20.602  22.523  1.00110.00           N
ATOM   2322  CA  CYS B 185      -8.266 -20.481  23.067  1.00110.00           C
ATOM   2323  C   CYS B 185      -9.310 -21.044  22.082  1.00110.00           C
ATOM   2324  O   CYS B 185      -9.248 -22.219  21.719  1.00110.00           O
ATOM   2325  CB  CYS B 185      -8.532 -19.044  23.591  1.00110.00           C
ATOM   2326  SG  CYS B 185      -7.349 -18.504  24.887  1.00110.00           S
ATOM   2327  N   GLY B 186     -10.277 -20.208  21.685  1.00110.00           N
ATOM   2328  CA  GLY B 186     -11.364 -20.554  20.769  1.00110.00           C
ATOM   2329  C   GLY B 186     -10.943 -20.392  19.310  1.00110.00           C
ATOM   2330  O   GLY B 186      -9.876 -20.909  18.983  1.00110.00           O
ATOM   2331  N   CYS B 187     -11.734 -19.713  18.451  1.00 30.00           N
ATOM   2332  CA  CYS B 187     -11.468 -19.280  17.089  1.00 30.00           C
ATOM   2333  C   CYS B 187     -11.811 -20.297  16.022  1.00 30.00           C
ATOM   2334  O   CYS B 187     -11.915 -19.958  14.844  1.00 30.00           O
ATOM   2335  CB  CYS B 187      -9.934 -18.983  16.923  1.00 30.00           C
ATOM   2336  SG  CYS B 187      -9.257 -17.696  18.054  1.00110.00           S
ATOM   2337  N   ALA B 188     -11.969 -21.556  16.422  1.00 30.00           N
ATOM   2338  CA  ALA B 188     -12.301 -22.595  15.460  1.00 30.00           C
ATOM   2339  C   ALA B 188     -13.625 -22.295  14.786  1.00 30.00           C
ATOM   2340  O   ALA B 188     -14.602 -21.914  15.437  1.00 30.00           O
ATOM   2341  N   THR B 189     -13.646 -22.485  13.473  1.00 30.00           N
ATOM   2342  CA  THR B 189     -14.838 -22.262  12.680  1.00 30.00           C
ATOM   2343  C   THR B 189     -15.120 -23.465  11.795  1.00 30.00           C
ATOM   2344  O   THR B 189     -14.208 -24.052  11.212  1.00 30.00           O
ATOM   2345  N   LEU B 190     -16.391 -23.822  11.703  1.00 30.00           N
ATOM   2346  CA  LEU B 190     -16.838 -24.910  10.843  1.00 30.00           C
ATOM   2347  C   LEU B 190     -18.179 -24.431  10.300  1.00 30.00           C
ATOM   2348  O   LEU B 190     -19.069 -24.047  11.066  1.00 30.00           O
ATOM   2349  N   GLY B 191     -18.318 -24.412   8.980  1.00 30.00           N
ATOM   2350  CA  GLY B 191     -19.568 -23.953   8.407  1.00 30.00           C
ATOM   2351  C   GLY B 191     -19.587 -23.918   6.892  1.00 30.00           C
ATOM   2352  O   GLY B 191     -18.580 -24.174   6.233  1.00 30.00           O
ATOM   2353  N   ALA B 192     -20.749 -23.594   6.342  1.00 30.00           N
ATOM   2354  CA  ALA B 192     -20.895 -23.532   4.904  1.00 30.00           C
ATOM   2355  C   ALA B 192     -22.304 -23.130   4.521  1.00 30.00           C
ATOM   2356  O   ALA B 192     -23.132 -22.822   5.385  1.00 30.00           O
ATOM   2357  N   SER B 193     -22.581 -23.123   3.222  1.00 30.00           N
ATOM   2358  CA  SER B 193     -23.902 -22.753   2.751  1.00 30.00           C
ATOM   2359  C   SER B 193     -24.258 -23.464   1.457  1.00 30.00           C
ATOM   2360  O   SER B 193     -23.395 -23.970   0.747  1.00 30.00           O
ATOM   2361  N   PHE B 194     -25.551 -23.486   1.172  1.00 30.00           N
ATOM   2362  CA  PHE B 194     -26.090 -24.083  -0.043  1.00 30.00           C
ATOM   2363  C   PHE B 194     -27.000 -23.001  -0.612  1.00 30.00           C
ATOM   2364  O   PHE B 194     -27.793 -22.407   0.114  1.00 30.00           O
ATOM   2365  CB  PHE B 194     -26.923 -25.351   0.237  1.00 30.00           C
ATOM   2366  CG  PHE B 194     -26.479 -26.160   1.439  1.00110.00           C
ATOM   2367  CD1 PHE B 194     -25.358 -26.995   1.371  1.00110.00           C
ATOM   2368  CD2 PHE B 194     -27.161 -26.042   2.659  1.00110.00           C
ATOM   2369  CE1 PHE B 194     -24.928 -27.701   2.496  1.00110.00           C
ATOM   2370  CE2 PHE B 194     -26.730 -26.746   3.785  1.00110.00           C
ATOM   2371  CZ  PHE B 194     -25.613 -27.575   3.703  1.00110.00           C
ATOM   2372  N   GLN B 195     -26.880 -22.727  -1.901  1.00 30.00           N
ATOM   2373  CA  GLN B 195     -27.706 -21.692  -2.493  1.00 30.00           C
ATOM   2374  C   GLN B 195     -28.116 -21.986  -3.923  1.00 30.00           C
ATOM   2375  O   GLN B 195     -27.587 -22.895  -4.566  1.00 30.00           O
ATOM   2376  N   TYR B 196     -29.085 -21.212  -4.395  1.00 30.00           N
ATOM   2377  CA  TYR B 196     -29.576 -21.315  -5.758  1.00 30.00           C
ATOM   2378  C   TYR B 196     -29.547 -19.898  -6.312  1.00 30.00           C
ATOM   2379  O   TYR B 196     -30.226 -19.005  -5.795  1.00 30.00           O
ATOM   2380  CB  TYR B 196     -30.996 -21.914  -5.665  1.00 30.00           C
ATOM   2381  CG  TYR B 196     -31.893 -21.950  -6.877  1.00 30.00           C
ATOM   2382  CD1 TYR B 196     -32.060 -23.140  -7.598  1.00 30.00           C
ATOM   2383  CD2 TYR B 196     -32.648 -20.825  -7.247  1.00 30.00           C
ATOM   2384  CE1 TYR B 196     -32.957 -23.204  -8.667  1.00 30.00           C
ATOM   2385  CE2 TYR B 196     -33.541 -20.885  -8.320  1.00 30.00           C
ATOM   2386  CZ  TYR B 196     -33.690 -22.077  -9.021  1.00 30.00           C
ATOM   2387  OH  TYR B 196     -34.551 -22.178 -10.075  1.00 30.00           O
ATOM   2388  N   ALA B 197     -28.742 -19.691  -7.347  1.00 30.00           N
ATOM   2389  CA  ALA B 197     -28.633 -18.384  -7.975  1.00 30.00           C
ATOM   2390  C   ALA B 197     -28.840 -18.513  -9.479  1.00 30.00           C
ATOM   2391  O   ALA B 197     -28.021 -19.111 -10.178  1.00 30.00           O
ATOM   2392  N   GLN B 198     -29.935 -17.950  -9.971  1.00 30.00           N
ATOM   2393  CA  GLN B 198     -30.237 -18.008 -11.396  1.00 30.00           C
ATOM   2394  C   GLN B 198     -31.139 -16.847 -11.778  1.00 30.00           C
ATOM   2395  O   GLN B 198     -32.195 -16.643 -11.177  1.00 30.00           O
ATOM   2396  N   SER B 199     -30.710 -16.084 -12.775  1.00 30.00           N
ATOM   2397  CA  SER B 199     -31.494 -14.955 -13.229  1.00 30.00           C
ATOM   2398  C   SER B 199     -31.848 -13.985 -12.116  1.00 30.00           C
ATOM   2399  O   SER B 199     -30.965 -13.533 -11.384  1.00 30.00           O
ATOM   2400  N   LYS B 200     -33.139 -13.648 -11.961  1.00 30.00           N
ATOM   2401  CA  LYS B 200     -33.601 -12.718 -10.926  1.00 30.00           C
ATOM   2402  C   LYS B 200     -33.766 -13.323  -9.531  1.00 30.00           C
ATOM   2403  O   LYS B 200     -34.063 -12.608  -8.576  1.00 30.00           O
ATOM   2404  CB  LYS B 200     -34.973 -12.194 -11.408  1.00 30.00           C
ATOM   2405  CG  LYS B 200     -34.876 -11.347 -12.690  1.00110.00           C
ATOM   2406  CD  LYS B 200     -36.234 -11.241 -13.395  1.00110.00           C
ATOM   2407  CE  LYS B 200     -36.189 -10.236 -14.538  1.00110.00           C
ATOM   2408  NZ  LYS B 200     -37.503 -10.196 -15.210  1.00110.00           N1+
ATOM   2409  N   PRO B 201     -33.576 -14.632  -9.415  1.00 30.00           N
ATOM   2410  CA  PRO B 201     -33.741 -15.309  -8.136  1.00 30.00           C
ATOM   2411  C   PRO B 201     -32.440 -15.713  -7.454  1.00 30.00           C
ATOM   2412  O   PRO B 201     -31.491 -16.170  -8.095  1.00 30.00           O
ATOM   2413  N   LYS B 202     -32.413 -15.552  -6.137  1.00 30.00           N
ATOM   2414  CA  LYS B 202     -31.249 -15.913  -5.337  1.00 30.00           C
ATOM   2415  C   LYS B 202     -31.736 -16.297  -3.954  1.00 30.00           C
ATOM   2416  O   LYS B 202     -32.457 -15.541  -3.312  1.00 30.00           O
ATOM   2417  CB  LYS B 202     -30.241 -14.747  -5.254  1.00 30.00           C
ATOM   2418  CG  LYS B 202     -28.865 -15.167  -4.702  1.00110.00           C
ATOM   2419  CD  LYS B 202     -28.694 -14.910  -3.198  1.00110.00           C
ATOM   2420  CE  LYS B 202     -27.412 -15.554  -2.674  1.00110.00           C
ATOM   2421  NZ  LYS B 202     -27.214 -15.213  -1.254  1.00110.00           N1+
ATOM   2422  N   VAL B 203     -31.352 -17.484  -3.504  1.00 30.00           N
ATOM   2423  CA  VAL B 203     -31.753 -17.969  -2.189  1.00 30.00           C
ATOM   2424  C   VAL B 203     -30.597 -18.747  -1.581  1.00 30.00           C
ATOM   2425  O   VAL B 203     -29.927 -19.509  -2.276  1.00 30.00           O
ATOM   2426  N   GLU B 204     -30.368 -18.555  -0.286  1.00 30.00           N
ATOM   2427  CA  GLU B 204     -29.274 -19.241   0.397  1.00 30.00           C
ATOM   2428  C   GLU B 204     -29.603 -19.649   1.826  1.00 30.00           C
ATOM   2429  O   GLU B 204     -30.407 -19.011   2.509  1.00 30.00           O
ATOM   2430  N   GLU B 205     -28.962 -20.726   2.261  1.00 30.00           N
ATOM   2431  CA  GLU B 205     -29.104 -21.228   3.616  1.00 30.00           C
ATOM   2432  C   GLU B 205     -27.691 -21.468   4.139  1.00 30.00           C
ATOM   2433  O   GLU B 205     -26.925 -22.233   3.546  1.00 30.00           O
ATOM   2434  N   LEU B 206     -27.341 -20.791   5.229  1.00 30.00           N
ATOM   2435  CA  LEU B 206     -26.025 -20.966   5.809  1.00 30.00           C
ATOM   2436  C   LEU B 206     -26.073 -21.461   7.245  1.00 30.00           C
ATOM   2437  O   LEU B 206     -26.946 -21.069   8.020  1.00 30.00           O
ATOM   2438  N   ASN B 207     -25.138 -22.339   7.592  1.00 30.00           N
ATOM   2439  CA  ASN B 207     -25.041 -22.889   8.942  1.00 30.00           C
ATOM   2440  C   ASN B 207     -23.580 -22.819   9.360  1.00 30.00           C
ATOM   2441  O   ASN B 207     -22.685 -23.171   8.586  1.00 30.00           O
ATOM   2442  N   VAL B 208     -23.336 -22.383  10.586  1.00 30.00           N
ATOM   2443  CA  VAL B 208     -21.968 -22.282  11.060  1.00 30.00           C
ATOM   2444  C   VAL B 208     -21.868 -22.369  12.571  1.00 30.00           C
ATOM   2445  O   VAL B 208     -22.810 -22.027  13.300  1.00 30.00           O
ATOM   2446  N   LEU B 209     -20.719 -22.847  13.034  1.00 30.00           N
ATOM   2447  CA  LEU B 209     -20.452 -22.929  14.460  1.00 30.00           C
ATOM   2448  C   LEU B 209     -19.012 -22.515  14.727  1.00 30.00           C
ATOM   2449  O   LEU B 209     -18.081 -22.956  14.039  1.00 30.00           O
ATOM   2450  N   CYS B 210     -18.837 -21.652  15.718  1.00 30.00           N
ATOM   2451  CA  CYS B 210     -17.513 -21.210  16.126  1.00 30.00           C
ATOM   2452  C   CYS B 210     -17.343 -21.586  17.589  1.00 30.00           C
ATOM   2453  O   CYS B 210     -18.322 -21.650  18.346  1.00 30.00           O
ATOM   2454  CB  CYS B 210     -17.401 -19.704  16.058  1.00 30.00           C
ATOM   2455  SG  CYS B 210     -17.459 -18.651  17.565  1.00110.00           S
ATOM   2456  N   ASN B 211     -16.101 -21.848  17.974  1.00 30.00           N
ATOM   2457  CA  ASN B 211     -15.776 -22.163  19.350  1.00 30.00           C
ATOM   2458  C   ASN B 211     -15.299 -20.852  19.955  1.00 30.00           C
ATOM   2459  O   ASN B 211     -14.514 -20.128  19.343  1.00 30.00           O
ATOM   2460  N   ALA B 212     -15.787 -20.526  21.141  1.00 30.00           N
ATOM   2461  CA  ALA B 212     -15.365 -19.300  21.786  1.00 30.00           C
ATOM   2462  C   ALA B 212     -15.458 -19.421  23.305  1.00 30.00           C
ATOM   2463  O   ALA B 212     -15.492 -20.526  23.856  1.00 30.00           O
ATOM   2464  N   SER B 213     -15.363 -18.273  23.989  1.00110.00           N
ATOM   2465  CA  SER B 213     -15.424 -18.106  25.432  1.00110.00           C
ATOM   2466  C   SER B 213     -14.282 -18.877  26.123  1.00110.00           C
ATOM   2467  O   SER B 213     -14.337 -19.087  27.330  1.00110.00           O
ATOM   2468  N   GLU B 214     -13.270 -19.277  25.341  1.00110.00           N
ATOM   2469  CA  GLU B 214     -12.161 -20.141  25.590  1.00110.00           C
ATOM   2470  C   GLU B 214     -12.642 -21.593  25.452  1.00110.00           C
ATOM   2471  O   GLU B 214     -12.548 -22.270  26.472  1.00110.00           O
ATOM   2472  N   PHE B 215     -13.176 -22.048  24.306  1.00110.00           N
ATOM   2473  CA  PHE B 215     -13.761 -23.378  24.079  1.00110.00           C
ATOM   2474  C   PHE B 215     -14.786 -23.721  25.172  1.00110.00           C
ATOM   2475  O   PHE B 215     -14.978 -24.889  25.509  1.00110.00           O
ATOM   2476  CB  PHE B 215     -12.707 -24.486  23.823  1.00110.00           C
ATOM   2477  CG  PHE B 215     -11.615 -24.705  24.847  1.00110.00           C
ATOM   2478  CD1 PHE B 215     -11.798 -25.579  25.927  1.00110.00           C
ATOM   2479  CD2 PHE B 215     -10.384 -24.044  24.718  1.00110.00           C
ATOM   2480  CE1 PHE B 215     -10.779 -25.775  26.862  1.00110.00           C
ATOM   2481  CE2 PHE B 215      -9.366 -24.239  25.653  1.00110.00           C
ATOM   2482  CZ  PHE B 215      -9.565 -25.104  26.726  1.00110.00           C
ATOM   2483  N   ASP B 248     -15.423 -22.684  25.714  1.00110.00           N
ATOM   2484  CA  ASP B 248     -16.340 -22.725  26.839  1.00110.00           C
ATOM   2485  C   ASP B 248     -17.741 -22.411  26.330  1.00110.00           C
ATOM   2486  O   ASP B 248     -18.723 -22.676  27.024  1.00110.00           O
ATOM   2487  N   TYR B 249     -17.857 -21.842  25.115  1.00 30.00           N
ATOM   2488  CA  TYR B 249     -19.153 -21.569  24.521  1.00 30.00           C
ATOM   2489  C   TYR B 249     -19.160 -21.835  23.019  1.00 30.00           C
ATOM   2490  O   TYR B 249     -18.159 -21.604  22.332  1.00 30.00           O
ATOM   2491  CB  TYR B 249     -19.591 -20.113  24.794  1.00 30.00           C
ATOM   2492  CG  TYR B 249     -21.083 -19.881  24.682  1.00110.00           C
ATOM   2493  CD1 TYR B 249     -21.966 -20.505  25.579  1.00110.00           C
ATOM   2494  CD2 TYR B 249     -21.603 -19.042  23.689  1.00110.00           C
ATOM   2495  CE1 TYR B 249     -23.343 -20.326  25.458  1.00110.00           C
ATOM   2496  CE2 TYR B 249     -22.983 -18.856  23.572  1.00110.00           C
ATOM   2497  CZ  TYR B 249     -23.842 -19.511  24.449  1.00110.00           C
ATOM   2498  OH  TYR B 249     -25.197 -19.385  24.346  1.00110.00           O
ATOM   2499  N   HIS B 250     -20.288 -22.334  22.522  1.00 30.00           N
ATOM   2500  CA  HIS B 250     -20.454 -22.585  21.094  1.00 30.00           C
ATOM   2501  C   HIS B 250     -21.282 -21.441  20.527  1.00 30.00           C
ATOM   2502  O   HIS B 250     -22.302 -21.062  21.105  1.00 30.00           O
ATOM   2503  CB  HIS B 250     -21.195 -23.910  20.837  1.00 30.00           C
ATOM   2504  CG  HIS B 250     -20.467 -25.099  21.384  1.00110.00           C
ATOM   2505  ND1 HIS B 250     -19.234 -25.509  20.934  1.00110.00           N
ATOM   2506  CD2 HIS B 250     -20.795 -25.995  22.379  1.00110.00           C
ATOM   2507  CE1 HIS B 250     -18.875 -26.607  21.669  1.00110.00           C
ATOM   2508  NE2 HIS B 250     -19.801 -26.927  22.547  1.00110.00           N
ATOM   2509  N   GLU B 251     -20.833 -20.875  19.412  1.00 30.00           N
ATOM   2510  CA  GLU B 251     -21.583 -19.811  18.757  1.00 30.00           C
ATOM   2511  C   GLU B 251     -22.220 -20.489  17.544  1.00 30.00           C
ATOM   2512  O   GLU B 251     -21.540 -20.764  16.553  1.00 30.00           O
ATOM   2513  N   TRP B 252     -23.512 -20.795  17.645  1.00 30.00           N
ATOM   2514  CA  TRP B 252     -24.243 -21.441  16.558  1.00 30.00           C
ATOM   2515  C   TRP B 252     -25.020 -20.388  15.787  1.00 30.00           C
ATOM   2516  O   TRP B 252     -25.699 -19.547  16.381  1.00 30.00           O
ATOM   2517  CB  TRP B 252     -25.213 -22.488  17.133  1.00 30.00           C
ATOM   2518  CG  TRP B 252     -25.994 -23.235  16.094  1.00110.00           C
ATOM   2519  CD1 TRP B 252     -25.524 -24.251  15.285  1.00110.00           C
ATOM   2520  CD2 TRP B 252     -27.369 -23.030  15.744  1.00110.00           C
ATOM   2521  NE1 TRP B 252     -26.545 -24.670  14.473  1.00110.00           N
ATOM   2522  CE3 TRP B 252     -28.375 -22.146  16.189  1.00110.00           C
ATOM   2523  CE2 TRP B 252     -27.687 -23.949  14.744  1.00110.00           C
ATOM   2524  CZ3 TRP B 252     -29.657 -22.220  15.629  1.00110.00           C
ATOM   2525  CZ2 TRP B 252     -28.965 -24.043  14.180  1.00110.00           C
ATOM   2526  CH2 TRP B 252     -29.946 -23.160  14.644  1.00110.00           C
ATOM   2527  N   GLN B 253     -24.924 -20.443  14.466  1.00 30.00           N
ATOM   2528  CA  GLN B 253     -25.595 -19.467  13.623  1.00 30.00           C
ATOM   2529  C   GLN B 253     -26.229 -20.084  12.384  1.00 30.00           C
ATOM   2530  O   GLN B 253     -25.566 -20.772  11.613  1.00 30.00           O
ATOM   2531  N   ALA B 254     -27.526 -19.847  12.217  1.00 30.00           N
ATOM   2532  CA  ALA B 254     -28.254 -20.335  11.050  1.00 30.00           C
ATOM   2533  C   ALA B 254     -28.802 -19.091  10.358  1.00 30.00           C
ATOM   2534  O   ALA B 254     -29.378 -18.214  11.003  1.00 30.00           O
ATOM   2535  N   SER B 255     -28.615 -19.006   9.046  1.00 30.00           N
ATOM   2536  CA  SER B 255     -29.058 -17.838   8.294  1.00 30.00           C
ATOM   2537  C   SER B 255     -29.736 -18.207   6.972  1.00 30.00           C
ATOM   2538  O   SER B 255     -29.192 -18.972   6.170  1.00 30.00           O
ATOM   2539  N   LEU B 256     -30.923 -17.659   6.746  1.00 30.00           N
ATOM   2540  CA  LEU B 256     -31.639 -17.916   5.509  1.00 30.00           C
ATOM   2541  C   LEU B 256     -31.829 -16.586   4.779  1.00 30.00           C
ATOM   2542  O   LEU B 256     -32.272 -15.598   5.366  1.00 30.00           O
ATOM   2543  N   ALA B 257     -31.477 -16.561   3.497  1.00 30.00           N
ATOM   2544  CA  ALA B 257     -31.616 -15.339   2.732  1.00 30.00           C
ATOM   2545  C   ALA B 257     -32.161 -15.581   1.342  1.00 30.00           C
ATOM   2546  O   ALA B 257     -32.020 -16.667   0.778  1.00 30.00           O
ATOM   2547  N   LEU B 258     -32.788 -14.554   0.785  1.00 30.00           N
ATOM   2548  CA  LEU B 258     -33.355 -14.630  -0.552  1.00 30.00           C
ATOM   2549  C   LEU B 258     -33.648 -13.233  -1.070  1.00 30.00           C
ATOM   2550  O   LEU B 258     -33.863 -12.298  -0.293  1.00 30.00           O
ATOM   2551  N   SER B 259     -33.638 -13.096  -2.391  1.00 30.00           N
ATOM   2552  CA  SER B 259     -33.927 -11.824  -3.022  1.00 30.00           C
ATOM   2553  C   SER B 259     -34.494 -12.094  -4.407  1.00 30.00           C
ATOM   2554  O   SER B 259     -34.205 -13.132  -5.021  1.00 30.00           O
ATOM   2555  N   TYR B 260     -35.316 -11.166  -4.888  1.00 30.00           N
ATOM   2556  CA  TYR B 260     -35.914 -11.294  -6.209  1.00 30.00           C
ATOM   2557  C   TYR B 260     -35.857  -9.937  -6.898  1.00 30.00           C
ATOM   2558  O   TYR B 260     -36.298  -8.931  -6.342  1.00 30.00           O
ATOM   2559  CB  TYR B 260     -37.381 -11.777  -6.125  1.00 30.00           C
ATOM   2560  CG  TYR B 260     -37.766 -12.694  -7.272  1.00 30.00           C
ATOM   2561  CD1 TYR B 260     -37.995 -12.182  -8.558  1.00 30.00           C
ATOM   2562  CD2 TYR B 260     -37.885 -14.075  -7.061  1.00 30.00           C
ATOM   2563  CE1 TYR B 260     -38.326 -13.034  -9.612  1.00 30.00           C
ATOM   2564  CE2 TYR B 260     -38.228 -14.927  -8.114  1.00 30.00           C
ATOM   2565  CZ  TYR B 260     -38.438 -14.400  -9.384  1.00 30.00           C
ATOM   2566  OH  TYR B 260     -38.754 -15.201 -10.443  1.00 30.00           O
ATOM   2567  N   ARG B 261     -35.304  -9.915  -8.105  1.00 30.00           N
ATOM   2568  CA  ARG B 261     -35.193  -8.684  -8.868  1.00 30.00           C
ATOM   2569  C   ARG B 261     -36.353  -8.606  -9.865  1.00 30.00           C
ATOM   2570  O   ARG B 261     -36.376  -9.348 -10.848  1.00 30.00           O
ATOM   2571  CB  ARG B 261     -33.835  -8.664  -9.600  1.00 30.00           C
ATOM   2572  CG  ARG B 261     -32.652  -8.782  -8.627  1.00110.00           C
ATOM   2573  CD  ARG B 261     -31.309  -8.633  -9.329  1.00110.00           C
ATOM   2574  NE  ARG B 261     -30.198  -8.655  -8.365  1.00110.00           N
ATOM   2575  CZ  ARG B 261     -29.704  -9.738  -7.742  1.00110.00           C
ATOM   2576  NH1 ARG B 261     -30.174 -10.964  -7.975  1.00110.00           N
ATOM   2577  NH2 ARG B 261     -28.710  -9.592  -6.861  1.00110.00           N1+
ATOM   2578  N   LEU B 262     -37.318  -7.725  -9.602  1.00 30.00           N
ATOM   2579  CA  LEU B 262     -38.464  -7.556 -10.498  1.00 30.00           C
ATOM   2580  C   LEU B 262     -38.184  -6.490 -11.554  1.00 30.00           C
ATOM   2581  O   LEU B 262     -39.099  -6.046 -12.248  1.00 30.00           O
ATOM   2582  N   ASN B 263     -36.930  -6.061 -11.659  1.00 30.00           N
ATOM   2583  CA  ASN B 263     -36.590  -5.046 -12.641  1.00 30.00           C
ATOM   2584  C   ASN B 263     -36.885  -3.635 -12.169  1.00 30.00           C
ATOM   2585  O   ASN B 263     -35.974  -2.823 -12.008  1.00 30.00           O
ATOM   2586  N   MET B 264     -38.163  -3.333 -11.958  1.00 30.00           N
ATOM   2587  CA  MET B 264     -38.570  -2.007 -11.496  1.00 30.00           C
ATOM   2588  C   MET B 264     -38.167  -1.816 -10.035  1.00 30.00           C
ATOM   2589  O   MET B 264     -38.036  -0.692  -9.546  1.00 30.00           O
ATOM   2590  N   PHE B 265     -37.977  -2.933  -9.342  1.00 30.00           N
ATOM   2591  CA  PHE B 265     -37.581  -2.917  -7.944  1.00 30.00           C
ATOM   2592  C   PHE B 265     -37.018  -4.288  -7.591  1.00 30.00           C
ATOM   2593  O   PHE B 265     -37.235  -5.269  -8.313  1.00 30.00           O
ATOM   2594  CB  PHE B 265     -38.782  -2.746  -6.970  1.00 30.00           C
ATOM   2595  CG  PHE B 265     -39.683  -1.545  -7.125  1.00110.00           C
ATOM   2596  CD1 PHE B 265     -39.297  -0.293  -6.631  1.00110.00           C
ATOM   2597  CD2 PHE B 265     -40.941  -1.674  -7.734  1.00110.00           C
ATOM   2598  CE1 PHE B 265     -40.145   0.810  -6.749  1.00110.00           C
ATOM   2599  CE2 PHE B 265     -41.791  -0.572  -7.845  1.00110.00           C
ATOM   2600  CZ  PHE B 265     -41.391   0.671  -7.356  1.00110.00           C
ATOM   2601  N   THR B 266     -36.284  -4.344  -6.483  1.00 30.00           N
ATOM   2602  CA  THR B 266     -35.700  -5.591  -6.018  1.00 30.00           C
ATOM   2603  C   THR B 266     -36.110  -5.812  -4.564  1.00 30.00           C
ATOM   2604  O   THR B 266     -36.104  -4.882  -3.759  1.00 30.00           O
ATOM   2605  N   PRO B 267     -36.471  -7.046  -4.239  1.00 30.00           N
ATOM   2606  CA  PRO B 267     -36.891  -7.383  -2.888  1.00 30.00           C
ATOM   2607  C   PRO B 267     -35.821  -8.283  -2.276  1.00 30.00           C
ATOM   2608  O   PRO B 267     -35.332  -9.206  -2.927  1.00 30.00           O
ATOM   2609  N   TYR B 268     -35.452  -8.012  -1.031  1.00 30.00           N
ATOM   2610  CA  TYR B 268     -34.435  -8.820  -0.376  1.00 30.00           C
ATOM   2611  C   TYR B 268     -34.729  -8.991   1.106  1.00 30.00           C
ATOM   2612  O   TYR B 268     -35.243  -8.081   1.757  1.00 30.00           O
ATOM   2613  CB  TYR B 268     -32.993  -8.234  -0.375  1.00 30.00           C
ATOM   2614  CG  TYR B 268     -32.378  -7.569  -1.583  1.00110.00           C
ATOM   2615  CD1 TYR B 268     -32.854  -6.333  -2.030  1.00110.00           C
ATOM   2616  CD2 TYR B 268     -31.195  -8.072  -2.148  1.00110.00           C
ATOM   2617  CE1 TYR B 268     -32.148  -5.606  -2.989  1.00110.00           C
ATOM   2618  CE2 TYR B 268     -30.522  -7.376  -3.155  1.00110.00           C
ATOM   2619  CZ  TYR B 268     -31.003  -6.142  -3.565  1.00110.00           C
ATOM   2620  OH  TYR B 268     -30.316  -5.469  -4.533  1.00110.00           O
ATOM   2621  N   ILE B 269     -34.402 -10.163   1.637  1.00 30.00           N
ATOM   2622  CA  ILE B 269     -34.641 -10.416   3.042  1.00 30.00           C
ATOM   2623  C   ILE B 269     -33.617 -11.338   3.672  1.00 30.00           C
ATOM   2624  O   ILE B 269     -32.920 -12.081   2.983  1.00 30.00           O
ATOM   2625  N   GLY B 270     -33.533 -11.281   4.995  1.00 30.00           N
ATOM   2626  CA  GLY B 270     -32.616 -12.109   5.762  1.00 30.00           C
ATOM   2627  C   GLY B 270     -33.281 -12.576   7.051  1.00 30.00           C
ATOM   2628  O   GLY B 270     -33.971 -11.809   7.720  1.00 30.00           O
ATOM   2629  N   VAL B 271     -33.067 -13.847   7.374  1.00 30.00           N
ATOM   2630  CA  VAL B 271     -33.585 -14.475   8.585  1.00 30.00           C
ATOM   2631  C   VAL B 271     -32.383 -15.106   9.263  1.00 30.00           C
ATOM   2632  O   VAL B 271     -31.665 -15.897   8.650  1.00 30.00           O
ATOM   2633  N   LYS B 272     -32.153 -14.765  10.522  1.00 30.00           N
ATOM   2634  CA  LYS B 272     -31.009 -15.324  11.214  1.00 30.00           C
ATOM   2635  C   LYS B 272     -31.230 -15.558  12.700  1.00 30.00           C
ATOM   2636  O   LYS B 272     -31.927 -14.806  13.379  1.00 30.00           O
ATOM   2637  CB  LYS B 272     -29.762 -14.426  11.062  1.00 30.00           C
ATOM   2638  CG  LYS B 272     -28.438 -15.148  11.355  1.00110.00           C
ATOM   2639  CD  LYS B 272     -27.235 -14.288  10.983  1.00110.00           C
ATOM   2640  CE  LYS B 272     -25.950 -15.095  10.912  1.00110.00           C
ATOM   2641  NZ  LYS B 272     -24.854 -14.237  10.425  1.00110.00           N1+
ATOM   2642  N   TRP B 273     -30.634 -16.631  13.190  1.00 30.00           N
ATOM   2643  CA  TRP B 273     -30.713 -16.964  14.592  1.00 30.00           C
ATOM   2644  C   TRP B 273     -29.293 -17.248  15.064  1.00 30.00           C
ATOM   2645  O   TRP B 273     -28.629 -18.150  14.561  1.00 30.00           O
ATOM   2646  CB  TRP B 273     -31.536 -18.248  14.827  1.00 30.00           C
ATOM   2647  CG  TRP B 273     -32.964 -18.182  14.365  1.00110.00           C
ATOM   2648  CD1 TRP B 273     -34.054 -17.786  15.114  1.00110.00           C
ATOM   2649  CD2 TRP B 273     -33.470 -18.575  13.081  1.00110.00           C
ATOM   2650  NE1 TRP B 273     -35.184 -17.916  14.349  1.00110.00           N
ATOM   2651  CE3 TRP B 273     -32.877 -19.071  11.901  1.00110.00           C
ATOM   2652  CE2 TRP B 273     -34.856 -18.418  13.110  1.00110.00           C
ATOM   2653  CZ3 TRP B 273     -33.682 -19.402  10.805  1.00110.00           C
ATOM   2654  CZ2 TRP B 273     -35.678 -18.749  12.025  1.00110.00           C
ATOM   2655  CH2 TRP B 273     -35.064 -19.250  10.873  1.00110.00           C
ATOM   2656  N   SER B 274     -28.922 -16.439  16.054  1.00110.00           N
ATOM   2657  CA  SER B 274     -27.833 -16.496  17.022  1.00110.00           C
ATOM   2658  C   SER B 274     -28.118 -15.389  18.045  1.00110.00           C
ATOM   2659  O   SER B 274     -28.403 -14.264  17.634  1.00110.00           O
ATOM   2660  N   ARG B 275     -28.092 -15.733  19.337  1.00110.00           N
ATOM   2661  CA  ARG B 275     -28.613 -14.865  20.456  1.00110.00           C
ATOM   2662  C   ARG B 275     -30.185 -15.235  20.358  1.00110.00           C
ATOM   2663  O   ARG B 275     -30.485 -16.426  20.435  1.00110.00           O
ATOM   2664  CB  ARG B 275     -28.269 -13.384  20.376  1.00110.00           C
ATOM   2665  CG  ARG B 275     -28.692 -12.533  21.586  1.00110.00           C
ATOM   2666  CD  ARG B 275     -27.960 -12.828  22.893  1.00110.00           C
ATOM   2667  NE  ARG B 275     -28.293 -11.791  23.887  1.00110.00           N
ATOM   2668  CZ  ARG B 275     -27.647 -11.593  25.047  1.00110.00           C
ATOM   2669  NH1 ARG B 275     -26.640 -12.375  25.429  1.00110.00           N
ATOM   2670  NH2 ARG B 275     -28.020 -10.590  25.847  1.00110.00           N1+
ATOM   2671  N   ALA B 320     -31.091 -14.273  20.174  1.00110.00           N
ATOM   2672  CA  ALA B 320     -32.512 -14.554  19.977  1.00110.00           C
ATOM   2673  C   ALA B 320     -32.770 -14.837  18.484  1.00110.00           C
ATOM   2674  O   ALA B 320     -32.980 -15.985  18.097  1.00110.00           O
ATOM   2675  N   ASP B 321     -32.728 -13.788  17.660  1.00110.00           N
ATOM   2676  CA  ASP B 321     -32.952 -13.802  16.212  1.00110.00           C
ATOM   2677  C   ASP B 321     -32.561 -12.420  15.634  1.00110.00           C
ATOM   2678  O   ASP B 321     -32.180 -11.561  16.430  1.00110.00           O
ATOM   2679  N   THR B 322     -32.657 -12.223  14.301  1.00 30.00           N
ATOM   2680  CA  THR B 322     -32.644 -11.005  13.512  1.00 30.00           C
ATOM   2681  C   THR B 322     -33.448 -11.200  12.236  1.00 30.00           C
ATOM   2682  O   THR B 322     -33.314 -12.220  11.561  1.00 30.00           O
ATOM   2683  N   MET B 323     -34.369 -10.238  11.959  1.00 30.00           N
ATOM   2684  CA  MET B 323     -35.258 -10.236  10.799  1.00 30.00           C
ATOM   2685  C   MET B 323     -34.808  -9.040   9.951  1.00 30.00           C
ATOM   2686  O   MET B 323     -34.449  -7.978  10.476  1.00 30.00           O
ATOM   2687  N   GLN B 324     -34.856  -9.176   8.619  1.00110.00           N
ATOM   2688  CA  GLN B 324     -34.610  -8.087   7.684  1.00110.00           C
ATOM   2689  C   GLN B 324     -35.703  -8.054   6.604  1.00110.00           C
ATOM   2690  O   GLN B 324     -36.019  -9.093   6.024  1.00110.00           O
ATOM   2691  N   ILE B 325     -36.260  -6.865   6.350  1.00110.00           N
ATOM   2692  CA  ILE B 325     -37.310  -6.611   5.356  1.00110.00           C
ATOM   2693  C   ILE B 325     -36.853  -5.451   4.452  1.00110.00           C
ATOM   2694  O   ILE B 325     -36.984  -4.289   4.841  1.00110.00           O
ATOM   2695  N   VAL B 326     -36.329  -5.778   3.267  1.00110.00           N
ATOM   2696  CA  VAL B 326     -35.866  -4.761   2.350  1.00110.00           C
ATOM   2697  C   VAL B 326     -36.776  -4.245   1.200  1.00110.00           C
ATOM   2698  O   VAL B 326     -37.543  -5.014   0.617  1.00110.00           O
ATOM   2699  N   SER B 327     -36.568  -2.991   0.800  1.00110.00           N
ATOM   2700  CA  SER B 327     -37.097  -2.361  -0.399  1.00110.00           C
ATOM   2701  C   SER B 327     -36.014  -1.490  -1.069  1.00110.00           C
ATOM   2702  O   SER B 327     -34.851  -1.518  -0.664  1.00110.00           O
ATOM   2703  N   LEU B 328     -36.382  -0.749  -2.118  1.00110.00           N
ATOM   2704  CA  LEU B 328     -35.477   0.138  -2.841  1.00110.00           C
ATOM   2705  C   LEU B 328     -35.012   1.233  -1.892  1.00110.00           C
ATOM   2706  O   LEU B 328     -35.794   2.122  -1.550  1.00110.00           O
ATOM   2707  N   GLN B 329     -33.746   1.103  -1.491  1.00110.00           N
ATOM   2708  CA  GLN B 329     -33.036   1.985  -0.582  1.00110.00           C
ATOM   2709  C   GLN B 329     -33.814   2.172   0.721  1.00110.00           C
ATOM   2710  O   GLN B 329     -33.728   3.212   1.377  1.00110.00           O
ATOM   2711  N   LEU B 330     -34.624   1.176   1.077  1.00 30.00           N
ATOM   2712  CA  LEU B 330     -35.509   1.136   2.233  1.00 30.00           C
ATOM   2713  C   LEU B 330     -35.150  -0.196   2.896  1.00 30.00           C
ATOM   2714  O   LEU B 330     -35.016  -1.169   2.155  1.00 30.00           O
ATOM   2715  N   ASN B 331     -34.987  -0.232   4.207  1.00 30.00           N
ATOM   2716  CA  ASN B 331     -34.646  -1.479   4.862  1.00 30.00           C
ATOM   2717  C   ASN B 331     -35.239  -1.483   6.266  1.00 30.00           C
ATOM   2718  O   ASN B 331     -35.577  -0.445   6.836  1.00 30.00           O
ATOM   2719  N   LYS B 332     -35.260  -2.689   6.810  1.00 30.00           N
ATOM   2720  CA  LYS B 332     -35.730  -2.893   8.154  1.00 30.00           C
ATOM   2721  C   LYS B 332     -34.824  -3.958   8.758  1.00 30.00           C
ATOM   2722  O   LYS B 332     -34.571  -4.957   8.099  1.00 30.00           O
ATOM   2723  CB  LYS B 332     -37.196  -3.328   8.211  1.00 30.00           C
ATOM   2724  CG  LYS B 332     -37.797  -3.156   9.612  1.00110.00           C
ATOM   2725  CD  LYS B 332     -39.256  -3.615   9.654  1.00110.00           C
ATOM   2726  CE  LYS B 332     -39.870  -3.404  11.032  1.00110.00           C
ATOM   2727  NZ  LYS B 332     -41.274  -3.859  11.018  1.00110.00           N1+
ATOM   2728  N   MET B 333     -34.338  -3.720   9.966  1.00 30.00           N
ATOM   2729  CA  MET B 333     -33.480  -4.641  10.656  1.00 30.00           C
ATOM   2730  C   MET B 333     -33.873  -4.757  12.128  1.00 30.00           C
ATOM   2731  O   MET B 333     -34.151  -3.759  12.786  1.00 30.00           O
ATOM   2732  N   LYS B 334     -33.999  -5.978  12.593  1.00110.00           N
ATOM   2733  CA  LYS B 334     -34.306  -6.238  13.966  1.00110.00           C
ATOM   2734  C   LYS B 334     -33.400  -7.361  14.433  1.00110.00           C
ATOM   2735  O   LYS B 334     -32.854  -8.093  13.613  1.00110.00           O
ATOM   2736  CB  LYS B 334     -35.801  -6.597  14.059  1.00110.00           C
ATOM   2737  CG  LYS B 334     -36.354  -6.723  15.480  1.00110.00           C
ATOM   2738  CD  LYS B 334     -37.884  -6.804  15.476  1.00110.00           C
ATOM   2739  CE  LYS B 334     -38.438  -6.954  16.887  1.00110.00           C
ATOM   2740  NZ  LYS B 334     -39.911  -7.024  16.831  1.00110.00           N1+
ATOM   2741  N   SER B 335     -33.246  -7.474  15.741  1.00110.00           N
ATOM   2742  CA  SER B 335     -32.583  -8.522  16.449  1.00110.00           C
ATOM   2743  C   SER B 335     -33.135  -8.089  17.800  1.00110.00           C
ATOM   2744  O   SER B 335     -34.153  -7.399  17.851  1.00110.00           O
ATOM   2745  N   ARG B 336     -32.460  -8.466  18.881  1.00110.00           N
ATOM   2746  CA  ARG B 336     -32.832  -8.036  20.219  1.00110.00           C
ATOM   2747  C   ARG B 336     -31.821  -6.992  20.732  1.00110.00           C
ATOM   2748  O   ARG B 336     -31.879  -6.583  21.890  1.00110.00           O
ATOM   2749  CB  ARG B 336     -32.842  -9.280  21.133  1.00110.00           C
ATOM   2750  CG  ARG B 336     -33.700  -9.105  22.392  1.00110.00           C
ATOM   2751  CD  ARG B 336     -33.822 -10.412  23.173  1.00110.00           C
ATOM   2752  NE  ARG B 336     -34.659 -10.230  24.366  1.00110.00           N
ATOM   2753  CZ  ARG B 336     -35.036 -11.218  25.196  1.00110.00           C
ATOM   2754  NH1 ARG B 336     -34.641 -12.480  25.012  1.00110.00           N
ATOM   2755  NH2 ARG B 336     -35.827 -10.940  26.236  1.00110.00           N1+
ATOM   2756  N   LYS B 337     -30.907  -6.545  19.866  1.00110.00           N
ATOM   2757  CA  LYS B 337     -29.911  -5.528  20.183  1.00110.00           C
ATOM   2758  C   LYS B 337     -29.887  -4.485  19.078  1.00110.00           C
ATOM   2759  O   LYS B 337     -29.143  -3.496  19.139  1.00110.00           O
ATOM   2760  CB  LYS B 337     -28.536  -6.209  20.329  1.00110.00           C
ATOM   2761  CG  LYS B 337     -27.531  -5.381  21.143  1.00110.00           C
ATOM   2762  CD  LYS B 337     -26.212  -6.138  21.336  1.00110.00           C
ATOM   2763  CE  LYS B 337     -25.211  -5.330  22.152  1.00110.00           C
ATOM   2764  NZ  LYS B 337     -23.974  -6.117  22.327  1.00110.00           N1+
ATOM   2765  N   SER B 338     -30.692  -4.689  18.037  1.00 30.00           N
ATOM   2766  CA  SER B 338     -30.765  -3.838  16.845  1.00 30.00           C
ATOM   2767  C   SER B 338     -32.222  -3.685  16.427  1.00 30.00           C
ATOM   2768  O   SER B 338     -32.946  -4.688  16.418  1.00 30.00           O
ATOM   2769  N   CYS B 339     -32.636  -2.487  16.035  1.00 30.00           N
ATOM   2770  CA  CYS B 339     -34.047  -2.334  15.645  1.00 30.00           C
ATOM   2771  C   CYS B 339     -34.267  -0.965  15.022  1.00 30.00           C
ATOM   2772  O   CYS B 339     -34.396   0.066  15.691  1.00 30.00           O
ATOM   2773  CB  CYS B 339     -34.987  -2.460  16.877  1.00 30.00           C
ATOM   2774  SG  CYS B 339     -36.762  -2.598  16.432  1.00110.00           S
ATOM   2775  N   GLY B 340     -34.296  -0.963  13.689  1.00 30.00           N
ATOM   2776  CA  GLY B 340     -34.473   0.280  12.965  1.00 30.00           C
ATOM   2777  C   GLY B 340     -35.106   0.094  11.596  1.00 30.00           C
ATOM   2778  O   GLY B 340     -35.251  -0.977  11.015  1.00 30.00           O
ATOM   2779  N   ILE B 341     -35.397   1.259  11.037  1.00 30.00           N
ATOM   2780  CA  ILE B 341     -35.923   1.409   9.703  1.00 30.00           C
ATOM   2781  C   ILE B 341     -34.833   2.224   9.010  1.00 30.00           C
ATOM   2782  O   ILE B 341     -34.202   3.005   9.733  1.00 30.00           O
ATOM   2783  N   ALA B 342     -34.565   1.912   7.756  1.00 30.00           N
ATOM   2784  CA  ALA B 342     -33.526   2.678   7.067  1.00 30.00           C
ATOM   2785  C   ALA B 342     -34.163   3.259   5.817  1.00 30.00           C
ATOM   2786  O   ALA B 342     -35.020   2.647   5.188  1.00 30.00           O
ATOM   2787  N   VAL B 343     -33.719   4.450   5.475  1.00 30.00           N
ATOM   2788  CA  VAL B 343     -34.135   5.122   4.263  1.00 30.00           C
ATOM   2789  C   VAL B 343     -32.834   5.744   3.755  1.00 30.00           C
ATOM   2790  O   VAL B 343     -32.110   6.399   4.510  1.00 30.00           O
ATOM   2791  N   GLY B 344     -32.558   5.580   2.471  1.00 30.00           N
ATOM   2792  CA  GLY B 344     -31.313   6.149   1.984  1.00 30.00           C
ATOM   2793  C   GLY B 344     -31.304   6.177   0.482  1.00 30.00           C
ATOM   2794  O   GLY B 344     -32.244   5.763  -0.166  1.00 30.00           O
ATOM   2795  N   THR B 345     -30.214   6.755  -0.003  1.00 30.00           N
ATOM   2796  CA  THR B 345     -30.034   6.793  -1.444  1.00 30.00           C
ATOM   2797  C   THR B 345     -28.541   6.905  -1.748  1.00 30.00           C
ATOM   2798  O   THR B 345     -27.768   7.543  -1.043  1.00 30.00           O
ATOM   2799  N   THR B 346     -28.219   6.277  -2.868  1.00 30.00           N
ATOM   2800  CA  THR B 346     -26.879   6.432  -3.413  1.00 30.00           C
ATOM   2801  C   THR B 346     -27.055   7.071  -4.784  1.00 30.00           C
ATOM   2802  O   THR B 346     -27.981   6.674  -5.496  1.00 30.00           O
ATOM   2803  N   ILE B 347     -26.186   8.002  -5.114  1.00 30.00           N
ATOM   2804  CA  ILE B 347     -26.162   8.558  -6.455  1.00 30.00           C
ATOM   2805  C   ILE B 347     -24.807   8.212  -7.066  1.00 30.00           C
ATOM   2806  O   ILE B 347     -23.735   8.629  -6.618  1.00 30.00           O
ATOM   2807  N   VAL B 348     -24.892   7.464  -8.154  1.00 30.00           N
ATOM   2808  CA  VAL B 348     -23.750   6.979  -8.897  1.00 30.00           C
ATOM   2809  C   VAL B 348     -23.459   7.888 -10.077  1.00 30.00           C
ATOM   2810  O   VAL B 348     -24.185   7.792 -11.059  1.00 30.00           O
ATOM   2811  N   ASP B 349     -22.427   8.715  -9.982  1.00 30.00           N
ATOM   2812  CA  ASP B 349     -22.069   9.562 -11.112  1.00 30.00           C
ATOM   2813  C   ASP B 349     -21.573   8.677 -12.249  1.00 30.00           C
ATOM   2814  O   ASP B 349     -21.814   8.974 -13.403  1.00 30.00           O
ATOM   2815  N   ALA B 350     -20.833   7.633 -11.936  1.00 30.00           N
ATOM   2816  CA  ALA B 350     -20.303   6.637 -12.847  1.00 30.00           C
ATOM   2817  C   ALA B 350     -19.781   5.499 -11.962  1.00 30.00           C
ATOM   2818  O   ALA B 350     -20.078   5.473 -10.756  1.00 30.00           O
ATOM   2819  N   ASP B 351     -18.906   4.653 -12.453  1.00 30.00           N
ATOM   2820  CA  ASP B 351     -18.368   3.514 -11.719  1.00 30.00           C
ATOM   2821  C   ASP B 351     -17.303   3.892 -10.699  1.00 30.00           C
ATOM   2822  O   ASP B 351     -16.979   3.140  -9.791  1.00 30.00           O
ATOM   2823  N   LYS B 352     -16.749   5.090 -10.832  1.00 30.00           N
ATOM   2824  CA  LYS B 352     -15.699   5.561  -9.962  1.00 30.00           C
ATOM   2825  C   LYS B 352     -16.166   6.538  -8.901  1.00 30.00           C
ATOM   2826  O   LYS B 352     -15.421   6.787  -7.948  1.00 30.00           O
ATOM   2827  CB  LYS B 352     -14.687   5.924 -11.068  1.00 30.00           C
ATOM   2828  CG  LYS B 352     -14.641   5.077 -12.376  1.00110.00           C
ATOM   2829  CD  LYS B 352     -14.297   3.592 -12.233  1.00110.00           C
ATOM   2830  CE  LYS B 352     -12.832   3.310 -11.948  1.00110.00           C
ATOM   2831  NZ  LYS B 352     -12.645   1.846 -11.819  1.00110.00           N1+
ATOM   2832  N   TYR B 353     -17.319   7.168  -9.138  1.00 30.00           N
ATOM   2833  CA  TYR B 353     -17.697   8.224  -8.198  1.00 30.00           C
ATOM   2834  C   TYR B 353     -19.143   8.074  -7.762  1.00 30.00           C
ATOM   2835  O   TYR B 353     -20.038   7.913  -8.583  1.00 30.00           O
ATOM   2836  CB  TYR B 353     -17.662   9.638  -8.733  1.00 30.00           C
ATOM   2837  CG  TYR B 353     -16.346  10.159  -8.293  1.00110.00           C
ATOM   2838  CD1 TYR B 353     -16.044  10.414  -6.948  1.00110.00           C
ATOM   2839  CD2 TYR B 353     -15.388  10.315  -9.266  1.00110.00           C
ATOM   2840  CE1 TYR B 353     -14.733  10.659  -6.579  1.00110.00           C
ATOM   2841  CE2 TYR B 353     -14.100  10.621  -8.898  1.00110.00           C
ATOM   2842  CZ  TYR B 353     -13.766  10.651  -7.567  1.00110.00           C
ATOM   2843  OH  TYR B 353     -12.452  10.673  -7.251  1.00110.00           O
ATOM   2844  N   ALA B 354     -19.339   8.280  -6.463  1.00 30.00           N
ATOM   2845  CA  ALA B 354     -20.708   8.278  -5.972  1.00 30.00           C
ATOM   2846  C   ALA B 354     -20.813   9.123  -4.717  1.00 30.00           C
ATOM   2847  O   ALA B 354     -19.842   9.676  -4.209  1.00 30.00           O
ATOM   2848  N   VAL B 355     -22.048   9.351  -4.298  1.00 30.00           N
ATOM   2849  CA  VAL B 355     -22.317  10.048  -3.049  1.00 30.00           C
ATOM   2850  C   VAL B 355     -23.562   9.369  -2.482  1.00 30.00           C
ATOM   2851  O   VAL B 355     -24.352   8.869  -3.280  1.00 30.00           O
ATOM   2852  N   THR B 356     -23.745   9.396  -1.170  1.00 30.00           N
ATOM   2853  CA  THR B 356     -24.899   8.790  -0.569  1.00 30.00           C
ATOM   2854  C   THR B 356     -25.271   9.513   0.728  1.00 30.00           C
ATOM   2855  O   THR B 356     -24.493  10.268   1.307  1.00 30.00           O
ATOM   2856  N   VAL B 357     -26.508   9.251   1.126  1.00 30.00           N
ATOM   2857  CA  VAL B 357     -27.058   9.699   2.387  1.00 30.00           C
ATOM   2858  C   VAL B 357     -27.706   8.443   2.968  1.00 30.00           C
ATOM   2859  O   VAL B 357     -28.405   7.744   2.244  1.00 30.00           O
ATOM   2860  N   GLU B 358     -27.412   8.105   4.203  1.00 30.00           N
ATOM   2861  CA  GLU B 358     -28.013   6.914   4.790  1.00 30.00           C
ATOM   2862  C   GLU B 358     -28.620   7.328   6.120  1.00 30.00           C
ATOM   2863  O   GLU B 358     -27.896   7.902   6.923  1.00 30.00           O
ATOM   2864  N   ALA B 359     -29.900   7.055   6.314  1.00 30.00           N
ATOM   2865  CA  ALA B 359     -30.562   7.517   7.533  1.00 30.00           C
ATOM   2866  C   ALA B 359     -31.189   6.375   8.313  1.00 30.00           C
ATOM   2867  O   ALA B 359     -32.006   5.600   7.798  1.00 30.00           O
ATOM   2868  N   ARG B 360     -30.832   6.256   9.579  1.00 30.00           N
ATOM   2869  CA  ARG B 360     -31.326   5.258  10.494  1.00 30.00           C
ATOM   2870  C   ARG B 360     -32.354   5.853  11.466  1.00 30.00           C
ATOM   2871  O   ARG B 360     -32.091   6.727  12.290  1.00 30.00           O
ATOM   2872  CB  ARG B 360     -30.142   4.506  11.112  1.00 30.00           C
ATOM   2873  CG  ARG B 360     -29.414   5.096  12.303  1.00110.00           C
ATOM   2874  CD  ARG B 360     -28.372   4.110  12.821  1.00110.00           C
ATOM   2875  NE  ARG B 360     -27.859   4.501  14.132  1.00110.00           N
ATOM   2876  CZ  ARG B 360     -26.736   3.999  14.676  1.00110.00           C
ATOM   2877  NH1 ARG B 360     -26.022   3.046  14.071  1.00110.00           N
ATOM   2878  NH2 ARG B 360     -26.319   4.459  15.859  1.00110.00           N1+
ATOM   2879  N   LEU B 361     -33.584   5.415  11.281  1.00 30.00           N
ATOM   2880  CA  LEU B 361     -34.723   5.737  12.146  1.00 30.00           C
ATOM   2881  C   LEU B 361     -34.727   4.633  13.189  1.00 30.00           C
ATOM   2882  O   LEU B 361     -35.301   3.573  13.014  1.00 30.00           O
ATOM   2883  N   ILE B 362     -33.784   4.754  14.096  1.00110.00           N
ATOM   2884  CA  ILE B 362     -33.582   3.830  15.156  1.00110.00           C
ATOM   2885  C   ILE B 362     -33.560   4.704  16.377  1.00110.00           C
ATOM   2886  O   ILE B 362     -33.954   5.887  16.422  1.00110.00           O
ATOM   2887  N   ASP B 363     -33.260   3.961  17.379  1.00110.00           N
ATOM   2888  CA  ASP B 363     -33.862   4.197  18.783  1.00110.00           C
ATOM   2889  C   ASP B 363     -32.972   5.342  19.414  1.00110.00           C
ATOM   2890  O   ASP B 363     -33.573   6.419  20.064  1.00110.00           O
ATOM   2891  N   GLU B 364     -31.461   4.961  19.177  1.00110.00           N
ATOM   2892  CA  GLU B 364     -30.486   6.002  18.640  1.00110.00           C
ATOM   2893  C   GLU B 364     -30.671   6.345  17.055  1.00110.00           C
ATOM   2894  O   GLU B 364     -30.481   5.472  16.168  1.00110.00           O
ATOM   2895  N   ARG B 365     -30.965   7.615  16.660  1.00110.00           N
ATOM   2896  CA  ARG B 365     -31.066   8.082  15.231  1.00110.00           C
ATOM   2897  C   ARG B 365     -29.709   8.555  14.635  1.00110.00           C
ATOM   2898  O   ARG B 365     -29.103   9.426  15.275  1.00110.00           O
ATOM   2899  CB  ARG B 365     -32.053   9.287  15.237  1.00110.00           C
ATOM   2900  CG  ARG B 365     -32.438   9.862  13.868  1.00110.00           C
ATOM   2901  CD  ARG B 365     -31.531  10.994  13.384  1.00110.00           C
ATOM   2902  NE  ARG B 365     -32.040  11.561  12.126  1.00110.00           N
ATOM   2903  CZ  ARG B 365     -31.444  12.547  11.434  1.00110.00           C
ATOM   2904  NH1 ARG B 365     -30.298  13.099  11.840  1.00110.00           N
ATOM   2905  NH2 ARG B 365     -32.000  12.987  10.303  1.00110.00           N1+
ATOM   2906  N   ALA B 366     -29.278   8.172  13.409  1.00 30.00           N
ATOM   2907  CA  ALA B 366     -28.000   8.564  12.833  1.00 30.00           C
ATOM   2908  C   ALA B 366     -28.193   8.831  11.343  1.00 30.00           C
ATOM   2909  O   ALA B 366     -28.897   8.079  10.676  1.00 30.00           O
ATOM   2910  N   ALA B 367     -27.568   9.894  10.853  1.00 30.00           N
ATOM   2911  CA  ALA B 367     -27.594  10.190   9.435  1.00 30.00           C
ATOM   2912  C   ALA B 367     -26.127  10.189   8.963  1.00 30.00           C
ATOM   2913  O   ALA B 367     -25.290  10.877   9.547  1.00 30.00           O
ATOM   2914  N   HIS B 368     -25.873   9.453   7.887  1.00 30.00           N
ATOM   2915  CA  HIS B 368     -24.509   9.425   7.349  1.00 30.00           C
ATOM   2916  C   HIS B 368     -24.537  10.029   5.957  1.00 30.00           C
ATOM   2917  O   HIS B 368     -25.504   9.787   5.224  1.00 30.00           O
ATOM   2918  CB  HIS B 368     -23.982   7.982   7.150  1.00 30.00           C
ATOM   2919  CG  HIS B 368     -22.641   7.740   7.764  1.00110.00           C
ATOM   2920  ND1 HIS B 368     -21.499   8.412   7.399  1.00110.00           N
ATOM   2921  CD2 HIS B 368     -22.220   6.842   8.719  1.00110.00           C
ATOM   2922  CE1 HIS B 368     -20.484   7.959   8.194  1.00110.00           C
ATOM   2923  NE2 HIS B 368     -20.893   7.013   9.010  1.00110.00           N
ATOM   2924  N   VAL B 369     -23.529  10.822   5.632  1.00 30.00           N
ATOM   2925  CA  VAL B 369     -23.404  11.414   4.305  1.00 30.00           C
ATOM   2926  C   VAL B 369     -22.009  11.076   3.781  1.00 30.00           C
ATOM   2927  O   VAL B 369     -21.033  11.194   4.516  1.00 30.00           O
ATOM   2928  N   ASN B 370     -21.886  10.646   2.524  1.00 30.00           N
ATOM   2929  CA  ASN B 370     -20.604  10.161   2.049  1.00 30.00           C
ATOM   2930  C   ASN B 370     -20.294  10.544   0.625  1.00 30.00           C
ATOM   2931  O   ASN B 370     -21.192  10.544  -0.208  1.00 30.00           O
ATOM   2932  N   ALA B 371     -19.022  10.832   0.358  1.00 30.00           N
ATOM   2933  CA  ALA B 371     -18.577  11.043  -1.018  1.00 30.00           C
ATOM   2934  C   ALA B 371     -17.437  10.051  -1.245  1.00 30.00           C
ATOM   2935  O   ALA B 371     -16.530   9.896  -0.436  1.00 30.00           O
ATOM   2936  N   GLN B 372     -17.618   9.222  -2.270  1.00 30.00           N
ATOM   2937  CA  GLN B 372     -16.748   8.108  -2.584  1.00 30.00           C
ATOM   2938  C   GLN B 372     -16.090   8.206  -3.954  1.00 30.00           C
ATOM   2939  O   GLN B 372     -16.753   8.260  -4.987  1.00 30.00           O
ATOM   2940  N   PHE B 373     -14.765   8.162  -3.972  1.00 30.00           N
ATOM   2941  CA  PHE B 373     -14.005   7.970  -5.199  1.00 30.00           C
ATOM   2942  C   PHE B 373     -13.424   6.547  -5.083  1.00 30.00           C
ATOM   2943  O   PHE B 373     -12.954   6.152  -4.013  1.00 30.00           O
ATOM   2944  CB  PHE B 373     -12.564   8.493  -5.219  1.00 30.00           C
ATOM   2945  CG  PHE B 373     -11.293   7.742  -5.788  1.00110.00           C
ATOM   2946  CD1 PHE B 373     -10.590   6.801  -4.992  1.00110.00           C
ATOM   2947  CD2 PHE B 373     -10.714   7.998  -7.006  1.00110.00           C
ATOM   2948  CE1 PHE B 373      -9.390   6.194  -5.328  1.00110.00           C
ATOM   2949  CE2 PHE B 373      -9.564   7.293  -7.406  1.00110.00           C
ATOM   2950  CZ  PHE B 373      -8.870   6.451  -6.561  1.00110.00           C
ATOM   2951  N   ARG B 374     -13.514   5.772  -6.148  1.00 30.00           N
ATOM   2952  CA  ARG B 374     -12.992   4.411  -6.095  1.00 30.00           C
ATOM   2953  C   ARG B 374     -12.410   4.046  -7.457  1.00 30.00           C
ATOM   2954  O   ARG B 374     -12.855   4.564  -8.473  1.00 30.00           O
ATOM   2955  CB  ARG B 374     -14.101   3.418  -5.706  1.00 30.00           C
ATOM   2956  CG  ARG B 374     -15.307   3.415  -6.654  1.00110.00           C
ATOM   2957  CD  ARG B 374     -16.389   2.438  -6.209  1.00110.00           C
ATOM   2958  NE  ARG B 374     -17.494   2.432  -7.179  1.00110.00           N
ATOM   2959  CZ  ARG B 374     -18.809   2.450  -6.918  1.00110.00           C
ATOM   2960  NH1 ARG B 374     -19.301   2.635  -5.694  1.00110.00           N
ATOM   2961  NH2 ARG B 374     -19.671   2.273  -7.925  1.00110.00           N1+
ATOM   2962  N   PHE B 375     -11.505   3.071  -7.408  1.00 30.00           N
ATOM   2963  CA  PHE B 375     -10.884   2.590  -8.624  1.00 30.00           C
ATOM   2964  C   PHE B 375     -10.643   1.081  -8.522  1.00 30.00           C
ATOM   2965  O   PHE B 375     -10.603   0.523  -7.413  1.00 30.00           O
ATOM   2966  OXT PHE B 375     -10.381   0.435  -9.556  1.00 30.00           O1-
ATOM   2967  CB  PHE B 375      -9.502   3.200  -8.887  1.00 30.00           C
ATOM   2968  CG  PHE B 375      -8.400   2.754  -7.947  1.00 30.00           C
ATOM   2969  CD1 PHE B 375      -8.370   3.168  -6.615  1.00 30.00           C
ATOM   2970  CD2 PHE B 375      -7.377   1.923  -8.398  1.00 30.00           C
ATOM   2971  CE1 PHE B 375      -7.310   2.836  -5.774  1.00 30.00           C
ATOM   2972  CE2 PHE B 375      -6.333   1.558  -7.549  1.00 30.00           C
ATOM   2973  CZ  PHE B 375      -6.301   2.006  -6.235  1.00 30.00           C
TER    2974      PHE B 375
ATOM   2975  N   LEU C   1       5.675  -6.872 -10.143  1.00 30.00           N1+
ATOM   2976  CA  LEU C   1       5.410  -6.682 -11.597  1.00 30.00           C
ATOM   2977  C   LEU C   1       5.785  -5.244 -11.991  1.00 30.00           C
ATOM   2978  O   LEU C   1       5.656  -4.337 -11.181  1.00 30.00           O
ATOM   2979  N   PRO C   2       6.305  -5.086 -13.190  1.00 30.00           N
ATOM   2980  CA  PRO C   2       6.709  -3.765 -13.668  1.00 30.00           C
ATOM   2981  C   PRO C   2       5.473  -3.022 -14.110  1.00 30.00           C
ATOM   2982  O   PRO C   2       4.898  -3.491 -15.082  1.00 30.00           O
ATOM   2983  N   VAL C   3       5.001  -2.007 -13.402  1.00 30.00           N
ATOM   2984  CA  VAL C   3       3.742  -1.358 -13.792  1.00 30.00           C
ATOM   2985  C   VAL C   3       3.974   0.004 -14.431  1.00 30.00           C
ATOM   2986  O   VAL C   3       3.025   0.753 -14.667  1.00 30.00           O
ATOM   2987  N   GLY C   4       5.246   0.349 -14.602  1.00 30.00           N
ATOM   2988  CA  GLY C   4       5.560   1.671 -15.144  1.00 30.00           C
ATOM   2989  C   GLY C   4       6.998   1.655 -15.645  1.00 30.00           C
ATOM   2990  O   GLY C   4       7.892   1.097 -15.013  1.00 30.00           O
ATOM   2991  N   ASN C   5       7.169   2.183 -16.843  1.00 30.00           N
ATOM   2992  CA  ASN C   5       8.455   2.232 -17.510  1.00 30.00           C
ATOM   2993  C   ASN C   5       8.372   3.334 -18.564  1.00 30.00           C
ATOM   2994  O   ASN C   5       7.882   3.073 -19.658  1.00 30.00           O
ATOM   2995  N   PRO C   6       8.796   4.530 -18.215  1.00 30.00           N
ATOM   2996  CA  PRO C   6       8.718   5.645 -19.152  1.00 30.00           C
ATOM   2997  C   PRO C   6       9.710   6.725 -18.748  1.00 30.00           C
ATOM   2998  O   PRO C   6       9.955   6.930 -17.556  1.00 30.00           O
ATOM   2999  N   ALA C   7      10.300   7.382 -19.747  1.00 30.00           N
ATOM   3000  CA  ALA C   7      11.276   8.433 -19.524  1.00 30.00           C
ATOM   3001  C   ALA C   7      12.444   8.053 -18.623  1.00 30.00           C
ATOM   3002  O   ALA C   7      12.757   8.821 -17.702  1.00 30.00           O
ATOM   3003  N   GLU C   8      13.001   6.862 -18.709  1.00 30.00           N
ATOM   3004  CA  GLU C   8      14.095   6.414 -17.883  1.00 30.00           C
ATOM   3005  C   GLU C   8      13.747   5.868 -16.503  1.00 30.00           C
ATOM   3006  O   GLU C   8      14.631   5.314 -15.842  1.00 30.00           O
ATOM   3007  N   PRO C   9      12.503   5.959 -16.044  1.00 30.00           N
ATOM   3008  CA  PRO C   9      12.117   5.434 -14.753  1.00 30.00           C
ATOM   3009  C   PRO C   9      11.294   4.150 -14.875  1.00 30.00           C
ATOM   3010  O   PRO C   9      10.317   4.087 -15.621  1.00 30.00           O
ATOM   3011  N   SER C  10      11.672   3.118 -14.125  1.00 30.00           N
ATOM   3012  CA  SER C  10      10.880   1.896 -14.101  1.00 30.00           C
ATOM   3013  C   SER C  10      10.547   1.545 -12.641  1.00 30.00           C
ATOM   3014  O   SER C  10      11.357   1.555 -11.717  1.00 30.00           O
ATOM   3015  N   LEU C  11       9.267   1.278 -12.443  1.00 30.00           N
ATOM   3016  CA  LEU C  11       8.743   0.950 -11.128  1.00 30.00           C
ATOM   3017  C   LEU C  11       8.208  -0.478 -11.131  1.00 30.00           C
ATOM   3018  O   LEU C  11       7.381  -0.800 -11.970  1.00 30.00           O
ATOM   3019  N   MET C  12       8.639  -1.279 -10.182  1.00 30.00           N
ATOM   3020  CA  MET C  12       8.098  -2.619 -10.021  1.00 30.00           C
ATOM   3021  C   MET C  12       7.259  -2.624  -8.741  1.00 30.00           C
ATOM   3022  O   MET C  12       7.802  -2.334  -7.671  1.00 30.00           O
ATOM   3023  N   ILE C  13       5.969  -2.917  -8.849  1.00 30.00           N
ATOM   3024  CA  ILE C  13       5.100  -2.972  -7.673  1.00 30.00           C
ATOM   3025  C   ILE C  13       4.851  -4.459  -7.425  1.00 30.00           C
ATOM   3026  O   ILE C  13       4.546  -5.154  -8.392  1.00 30.00           O
ATOM   3027  N   ASP C  14       5.333  -4.972  -6.296  1.00 30.00           N
ATOM   3028  CA  ASP C  14       5.285  -6.425  -6.112  1.00 30.00           C
ATOM   3029  C   ASP C  14       4.640  -6.770  -4.775  1.00 30.00           C
ATOM   3030  O   ASP C  14       4.443  -5.915  -3.914  1.00 30.00           O
ATOM   3031  N   GLY C  15       4.283  -8.054  -4.650  1.00 30.00           N
ATOM   3032  CA  GLY C  15       3.571  -8.487  -3.458  1.00 30.00           C
ATOM   3033  C   GLY C  15       3.196  -9.957  -3.512  1.00 30.00           C
ATOM   3034  O   GLY C  15       3.381 -10.656  -4.511  1.00 30.00           O
ATOM   3035  N   ILE C  16       2.600 -10.397  -2.402  1.00 30.00           N
ATOM   3036  CA  ILE C  16       2.153 -11.783  -2.354  1.00 30.00           C
ATOM   3037  C   ILE C  16       1.129 -11.941  -1.251  1.00 30.00           C
ATOM   3038  O   ILE C  16       1.027 -11.131  -0.342  1.00 30.00           O
ATOM   3039  N   LEU C  17       0.299 -12.949  -1.431  1.00 30.00           N
ATOM   3040  CA  LEU C  17      -0.737 -13.291  -0.467  1.00 30.00           C
ATOM   3041  C   LEU C  17      -0.449 -14.759  -0.172  1.00 30.00           C
ATOM   3042  O   LEU C  17      -0.331 -15.553  -1.118  1.00 30.00           O
ATOM   3043  N   TRP C  18       0.008 -15.026   1.051  1.00 30.00           N
ATOM   3044  CA  TRP C  18       0.418 -16.376   1.404  1.00 30.00           C
ATOM   3045  C   TRP C  18      -0.536 -17.020   2.405  1.00 30.00           C
ATOM   3046  O   TRP C  18      -0.500 -16.692   3.591  1.00 30.00           O
ATOM   3047  CB  TRP C  18       1.793 -16.316   2.144  1.00 30.00           C
ATOM   3048  CG  TRP C  18       3.026 -16.641   1.355  1.00110.00           C
ATOM   3049  CD1 TRP C  18       3.312 -16.318   0.048  1.00110.00           C
ATOM   3050  CD2 TRP C  18       4.167 -17.360   1.859  1.00110.00           C
ATOM   3051  NE1 TRP C  18       4.558 -16.807  -0.260  1.00110.00           N
ATOM   3052  CE3 TRP C  18       4.490 -17.946   3.103  1.00110.00           C
ATOM   3053  CE2 TRP C  18       5.080 -17.487   0.815  1.00110.00           C
ATOM   3054  CZ3 TRP C  18       5.687 -18.658   3.244  1.00110.00           C
ATOM   3055  CZ2 TRP C  18       6.278 -18.202   0.934  1.00110.00           C
ATOM   3056  CH2 TRP C  18       6.562 -18.790   2.170  1.00110.00           C
ATOM   3057  N   GLU C  19      -1.328 -17.981   1.929  1.00 30.00           N
ATOM   3058  CA  GLU C  19      -2.225 -18.721   2.835  1.00 30.00           C
ATOM   3059  C   GLU C  19      -1.332 -19.798   3.472  1.00 30.00           C
ATOM   3060  O   GLU C  19      -0.692 -20.565   2.755  1.00 30.00           O
ATOM   3061  N   GLY C  20      -1.138 -19.747   4.777  1.00 30.00           N
ATOM   3062  CA  GLY C  20      -0.114 -20.530   5.435  1.00 30.00           C
ATOM   3063  C   GLY C  20      -0.599 -21.085   6.773  1.00 30.00           C
ATOM   3064  O   GLY C  20      -1.188 -20.356   7.561  1.00 30.00           O
ATOM   3065  N   PHE C  21      -0.303 -22.366   6.994  1.00 30.00           N
ATOM   3066  CA  PHE C  21      -0.755 -23.050   8.202  1.00 30.00           C
ATOM   3067  C   PHE C  21       0.331 -23.972   8.760  1.00 30.00           C
ATOM   3068  O   PHE C  21       1.049 -24.647   8.007  1.00 30.00           O
ATOM   3069  CB  PHE C  21      -2.015 -23.871   7.838  1.00 30.00           C
ATOM   3070  CG  PHE C  21      -2.385 -25.005   8.767  1.00110.00           C
ATOM   3071  CD1 PHE C  21      -3.178 -24.786   9.897  1.00110.00           C
ATOM   3072  CD2 PHE C  21      -1.925 -26.306   8.497  1.00110.00           C
ATOM   3073  CE1 PHE C  21      -3.511 -25.854  10.735  1.00110.00           C
ATOM   3074  CE2 PHE C  21      -2.248 -27.365   9.345  1.00110.00           C
ATOM   3075  CZ  PHE C  21      -3.043 -27.139  10.464  1.00110.00           C
ATOM   3076  N   GLY C  22       0.641 -23.798  10.038  1.00 30.00           N
ATOM   3077  CA  GLY C  22       1.630 -24.611  10.729  1.00 30.00           C
ATOM   3078  C   GLY C  22       0.914 -25.695  11.553  1.00 30.00           C
ATOM   3079  O   GLY C  22      -0.023 -25.418  12.302  1.00 30.00           O
ATOM   3080  N   GLY C  23       1.433 -26.895  11.443  1.00 30.00           N
ATOM   3081  CA  GLY C  23       0.906 -28.041  12.179  1.00 30.00           C
ATOM   3082  C   GLY C  23       1.963 -28.577  13.141  1.00 30.00           C
ATOM   3083  O   GLY C  23       3.042 -28.991  12.728  1.00 30.00           O
ATOM   3084  N   ASP C  24       1.694 -28.500  14.422  1.00 30.00           N
ATOM   3085  CA  ASP C  24       2.513 -29.027  15.494  1.00 30.00           C
ATOM   3086  C   ASP C  24       1.605 -29.591  16.596  1.00 30.00           C
ATOM   3087  O   ASP C  24       0.399 -29.344  16.625  1.00 30.00           O
ATOM   3088  N   PRO C  25       2.081 -30.537  17.424  1.00110.00           N
ATOM   3089  CA  PRO C  25       1.413 -31.000  18.638  1.00110.00           C
ATOM   3090  C   PRO C  25       1.589 -30.074  19.851  1.00110.00           C
ATOM   3091  O   PRO C  25       0.966 -30.338  20.877  1.00110.00           O
ATOM   3092  N   CYS C  26       2.414 -29.024  19.748  1.00110.00           N
ATOM   3093  CA  CYS C  26       2.597 -28.104  20.932  1.00110.00           C
ATOM   3094  C   CYS C  26       2.448 -26.623  20.556  1.00110.00           C
ATOM   3095  O   CYS C  26       1.750 -25.882  21.247  1.00110.00           O
ATOM   3096  CB  CYS C  26       3.900 -28.392  21.709  1.00110.00           C
ATOM   3097  SG  CYS C  26       5.494 -28.134  20.861  1.00110.00           S
ATOM   3098  N   THR C  31       3.091 -26.190  19.469  1.00110.00           N
ATOM   3099  CA  THR C  31       3.064 -24.806  19.009  1.00110.00           C
ATOM   3100  C   THR C  31       3.145 -24.797  17.486  1.00110.00           C
ATOM   3101  O   THR C  31       4.123 -25.278  16.929  1.00110.00           O
ATOM   3102  N   TRP C  32       2.166 -24.202  16.809  1.00110.00           N
ATOM   3103  CA  TRP C  32       2.146 -23.917  15.363  1.00110.00           C
ATOM   3104  C   TRP C  32       3.266 -22.830  15.119  1.00110.00           C
ATOM   3105  O   TRP C  32       3.845 -22.305  16.073  1.00110.00           O
ATOM   3106  CB  TRP C  32       0.774 -23.310  14.964  1.00110.00           C
ATOM   3107  CG  TRP C  32       0.369 -22.099  15.797  1.00110.00           C
ATOM   3108  CD1 TRP C  32      -0.196 -22.125  17.062  1.00110.00           C
ATOM   3109  CD2 TRP C  32       0.484 -20.712  15.448  1.00110.00           C
ATOM   3110  NE1 TRP C  32      -0.304 -20.843  17.528  1.00110.00           N
ATOM   3111  CE3 TRP C  32       0.909 -20.019  14.298  1.00110.00           C
ATOM   3112  CE2 TRP C  32       0.062 -19.958  16.545  1.00110.00           C
ATOM   3113  CZ3 TRP C  32       0.910 -18.618  14.292  1.00110.00           C
ATOM   3114  CZ2 TRP C  32       0.056 -18.558  16.558  1.00110.00           C
ATOM   3115  CH2 TRP C  32       0.489 -17.899  15.407  1.00110.00           C
ATOM   3116  N   CYS C  33       3.592 -22.584  13.851  1.00110.00           N
ATOM   3117  CA  CYS C  33       4.739 -21.763  13.471  1.00110.00           C
ATOM   3118  C   CYS C  33       4.290 -20.344  13.092  1.00110.00           C
ATOM   3119  O   CYS C  33       4.145 -19.476  13.948  1.00110.00           O
ATOM   3120  CB  CYS C  33       5.592 -22.467  12.401  1.00110.00           C
ATOM   3121  SG  CYS C  33       4.731 -22.904  10.845  1.00110.00           S
ATOM   3122  N   ASP C  34       4.076 -20.133  11.798  1.00110.00           N
ATOM   3123  CA  ASP C  34       3.632 -18.907  11.163  1.00110.00           C
ATOM   3124  C   ASP C  34       2.161 -19.089  10.759  1.00110.00           C
ATOM   3125  O   ASP C  34       1.577 -20.166  10.910  1.00110.00           O
ATOM   3126  N   ALA C  35       1.572 -18.022  10.226  1.00110.00           N
ATOM   3127  CA  ALA C  35       0.193 -17.989   9.751  1.00110.00           C
ATOM   3128  C   ALA C  35       0.140 -17.190   8.454  1.00110.00           C
ATOM   3129  O   ALA C  35       1.177 -16.705   7.997  1.00110.00           O
ATOM   3130  N   ILE C  36      -1.058 -17.037   7.874  1.00 30.00           N
ATOM   3131  CA  ILE C  36      -1.335 -16.267   6.677  1.00 30.00           C
ATOM   3132  C   ILE C  36      -0.775 -14.854   6.740  1.00 30.00           C
ATOM   3133  O   ILE C  36      -0.787 -14.181   7.785  1.00 30.00           O
ATOM   3134  N   SER C  37      -0.104 -14.436   5.655  1.00 30.00           N
ATOM   3135  CA  SER C  37       0.405 -13.057   5.619  1.00 30.00           C
ATOM   3136  C   SER C  37       0.402 -12.565   4.172  1.00 30.00           C
ATOM   3137  O   SER C  37       0.170 -13.314   3.215  1.00 30.00           O
ATOM   3138  N   MET C  38       0.604 -11.260   4.002  1.00 30.00           N
ATOM   3139  CA  MET C  38       0.696 -10.684   2.656  1.00 30.00           C
ATOM   3140  C   MET C  38       1.913  -9.767   2.657  1.00 30.00           C
ATOM   3141  O   MET C  38       2.345  -9.333   3.725  1.00 30.00           O
ATOM   3142  N   ARG C  39       2.450  -9.505   1.476  1.00 30.00           N
ATOM   3143  CA  ARG C  39       3.600  -8.624   1.376  1.00 30.00           C
ATOM   3144  C   ARG C  39       3.251  -7.553   0.340  1.00 30.00           C
ATOM   3145  O   ARG C  39       2.564  -7.889  -0.612  1.00 30.00           O
ATOM   3146  CB  ARG C  39       4.874  -9.342   0.896  1.00 30.00           C
ATOM   3147  CG  ARG C  39       5.492 -10.314   1.907  1.00 30.00           C
ATOM   3148  CD  ARG C  39       6.320  -9.613   2.975  1.00 30.00           C
ATOM   3149  NE  ARG C  39       6.930 -10.551   3.920  1.00 30.00           N
ATOM   3150  CZ  ARG C  39       8.035 -11.286   3.735  1.00 30.00           C
ATOM   3151  NH1 ARG C  39       8.691 -11.315   2.575  1.00 30.00           N
ATOM   3152  NH2 ARG C  39       8.494 -12.008   4.757  1.00 30.00           N1+
ATOM   3153  N   VAL C  40       3.723  -6.337   0.530  1.00 30.00           N
ATOM   3154  CA  VAL C  40       3.541  -5.340  -0.530  1.00 30.00           C
ATOM   3155  C   VAL C  40       4.871  -4.577  -0.616  1.00 30.00           C
ATOM   3156  O   VAL C  40       5.492  -4.284   0.410  1.00 30.00           O
ATOM   3157  N   GLY C  41       5.320  -4.249  -1.817  1.00 30.00           N
ATOM   3158  CA  GLY C  41       6.573  -3.496  -1.923  1.00 30.00           C
ATOM   3159  C   GLY C  41       6.642  -2.821  -3.296  1.00 30.00           C
ATOM   3160  O   GLY C  41       5.892  -3.133  -4.228  1.00 30.00           O
ATOM   3161  N   TYR C  42       7.594  -1.904  -3.397  1.00 30.00           N
ATOM   3162  CA  TYR C  42       7.891  -1.294  -4.671  1.00 30.00           C
ATOM   3163  C   TYR C  42       9.429  -1.303  -4.804  1.00 30.00           C
ATOM   3164  O   TYR C  42      10.158  -1.204  -3.816  1.00 30.00           O
ATOM   3165  CB  TYR C  42       7.442   0.177  -4.772  1.00 30.00           C
ATOM   3166  CG  TYR C  42       6.051   0.523  -4.290  1.00110.00           C
ATOM   3167  CD1 TYR C  42       4.949  -0.272  -4.606  1.00110.00           C
ATOM   3168  CD2 TYR C  42       5.827   1.694  -3.557  1.00110.00           C
ATOM   3169  CE1 TYR C  42       3.666   0.041  -4.167  1.00110.00           C
ATOM   3170  CE2 TYR C  42       4.535   2.037  -3.152  1.00110.00           C
ATOM   3171  CZ  TYR C  42       3.466   1.203  -3.449  1.00110.00           C
ATOM   3172  OH  TYR C  42       2.217   1.553  -3.044  1.00110.00           O
ATOM   3173  N   TYR C  43       9.873  -1.367  -6.055  1.00 30.00           N
ATOM   3174  CA  TYR C  43      11.274  -1.276  -6.386  1.00 30.00           C
ATOM   3175  C   TYR C  43      11.336  -0.321  -7.603  1.00 30.00           C
ATOM   3176  O   TYR C  43      10.729  -0.626  -8.625  1.00 30.00           O
ATOM   3177  CB  TYR C  43      11.915  -2.608  -6.811  1.00 30.00           C
ATOM   3178  CG  TYR C  43      12.137  -3.639  -5.727  1.00110.00           C
ATOM   3179  CD1 TYR C  43      11.058  -4.299  -5.122  1.00110.00           C
ATOM   3180  CD2 TYR C  43      13.441  -4.004  -5.360  1.00110.00           C
ATOM   3181  CE1 TYR C  43      11.276  -5.271  -4.145  1.00110.00           C
ATOM   3182  CE2 TYR C  43      13.661  -4.986  -4.390  1.00110.00           C
ATOM   3183  CZ  TYR C  43      12.575  -5.603  -3.780  1.00110.00           C
ATOM   3184  OH  TYR C  43      12.744  -6.552  -2.814  1.00110.00           O
ATOM   3185  N   GLY C  44      12.081   0.747  -7.465  1.00 30.00           N
ATOM   3186  CA  GLY C  44      12.210   1.726  -8.533  1.00 30.00           C
ATOM   3187  C   GLY C  44      13.698   1.845  -8.912  1.00 30.00           C
ATOM   3188  O   GLY C  44      14.617   1.631  -8.130  1.00 30.00           O
ATOM   3189  N   ASP C  45      13.888   2.256 -10.150  1.00 30.00           N
ATOM   3190  CA  ASP C  45      15.194   2.442 -10.755  1.00 30.00           C
ATOM   3191  C   ASP C  45      15.064   3.490 -11.854  1.00 30.00           C
ATOM   3192  O   ASP C  45      14.178   3.368 -12.694  1.00 30.00           O
ATOM   3193  N   PHE C  46      15.863   4.529 -11.806  1.00 30.00           N
ATOM   3194  CA  PHE C  46      15.816   5.573 -12.818  1.00 30.00           C
ATOM   3195  C   PHE C  46      17.213   5.708 -13.429  1.00 30.00           C
ATOM   3196  O   PHE C  46      18.231   5.702 -12.737  1.00 30.00           O
ATOM   3197  CB  PHE C  46      14.946   6.775 -12.355  1.00 30.00           C
ATOM   3198  CG  PHE C  46      13.789   6.494 -11.378  1.00110.00           C
ATOM   3199  CD1 PHE C  46      12.785   5.555 -11.607  1.00110.00           C
ATOM   3200  CD2 PHE C  46      13.616   7.224 -10.222  1.00110.00           C
ATOM   3201  CE1 PHE C  46      11.572   5.501 -10.926  1.00110.00           C
ATOM   3202  CE2 PHE C  46      12.470   7.097  -9.442  1.00110.00           C
ATOM   3203  CZ  PHE C  46      11.381   6.366  -9.888  1.00110.00           C
ATOM   3204  N   VAL C  47      17.250   5.792 -14.749  1.00 30.00           N
ATOM   3205  CA  VAL C  47      18.517   5.952 -15.461  1.00 30.00           C
ATOM   3206  C   VAL C  47      18.761   7.450 -15.575  1.00 30.00           C
ATOM   3207  O   VAL C  47      17.991   8.107 -16.253  1.00 30.00           O
ATOM   3208  N   PHE C  48      19.718   8.026 -14.846  1.00110.00           N
ATOM   3209  CA  PHE C  48      19.988   9.462 -14.846  1.00110.00           C
ATOM   3210  C   PHE C  48      21.484   9.689 -14.699  1.00110.00           C
ATOM   3211  O   PHE C  48      21.909  10.504 -13.881  1.00110.00           O
ATOM   3212  CB  PHE C  48      19.073  10.243 -13.884  1.00110.00           C
ATOM   3213  CG  PHE C  48      17.675  10.369 -14.484  1.00110.00           C
ATOM   3214  CD1 PHE C  48      17.473  11.058 -15.700  1.00110.00           C
ATOM   3215  CD2 PHE C  48      16.584   9.721 -13.896  1.00110.00           C
ATOM   3216  CE1 PHE C  48      16.221  11.072 -16.318  1.00110.00           C
ATOM   3217  CE2 PHE C  48      15.325   9.757 -14.503  1.00110.00           C
ATOM   3218  CZ  PHE C  48      15.144  10.431 -15.711  1.00110.00           C
ATOM   3219  N   ASP C  49      22.261   8.892 -15.439  1.00110.00           N
ATOM   3220  CA  ASP C  49      23.722   8.907 -15.472  1.00110.00           C
ATOM   3221  C   ASP C  49      24.305   8.395 -14.140  1.00110.00           C
ATOM   3222  O   ASP C  49      25.505   8.491 -13.892  1.00110.00           O
ATOM   3223  N   ARG C  50      23.430   7.873 -13.275  1.00110.00           N
ATOM   3224  CA  ARG C  50      23.699   7.483 -11.848  1.00110.00           C
ATOM   3225  C   ARG C  50      22.888   6.273 -11.297  1.00110.00           C
ATOM   3226  O   ARG C  50      22.973   5.995 -10.098  1.00110.00           O
ATOM   3227  CB  ARG C  50      23.524   8.723 -10.954  1.00110.00           C
ATOM   3228  CG  ARG C  50      24.535   9.855 -11.169  1.00110.00           C
ATOM   3229  CD  ARG C  50      24.229  11.045 -10.258  1.00110.00           C
ATOM   3230  NE  ARG C  50      24.514  10.755  -8.848  1.00110.00           N
ATOM   3231  CZ  ARG C  50      24.231  11.596  -7.836  1.00110.00           C
ATOM   3232  NH1 ARG C  50      23.583  12.744  -8.025  1.00110.00           N
ATOM   3233  NH2 ARG C  50      24.614  11.282  -6.595  1.00110.00           N1+
ATOM   3234  N   VAL C  51      22.125   5.622 -12.193  1.00110.00           N
ATOM   3235  CA  VAL C  51      21.263   4.444 -11.968  1.00110.00           C
ATOM   3236  C   VAL C  51      20.789   4.386 -10.511  1.00110.00           C
ATOM   3237  O   VAL C  51      21.063   3.443  -9.768  1.00110.00           O
ATOM   3238  N   LEU C  52      20.173   5.487 -10.087  1.00110.00           N
ATOM   3239  CA  LEU C  52      19.670   5.663  -8.742  1.00110.00           C
ATOM   3240  C   LEU C  52      18.540   4.606  -8.588  1.00110.00           C
ATOM   3241  O   LEU C  52      18.005   4.132  -9.595  1.00110.00           O
ATOM   3242  N   LYS C  53      18.057   4.303  -7.388  1.00 30.00           N
ATOM   3243  CA  LYS C  53      17.112   3.231  -7.120  1.00 30.00           C
ATOM   3244  C   LYS C  53      16.588   3.390  -5.692  1.00 30.00           C
ATOM   3245  O   LYS C  53      17.207   4.039  -4.868  1.00 30.00           O
ATOM   3246  CB  LYS C  53      17.828   1.856  -7.194  1.00 30.00           C
ATOM   3247  CG  LYS C  53      17.748   1.075  -8.509  1.00110.00           C
ATOM   3248  CD  LYS C  53      18.799  -0.043  -8.590  1.00110.00           C
ATOM   3249  CE  LYS C  53      18.507  -1.231  -7.676  1.00110.00           C
ATOM   3250  NZ  LYS C  53      19.775  -1.780  -7.167  1.00110.00           N1+
ATOM   3251  N   THR C  54      15.426   2.777  -5.470  1.00 30.00           N
ATOM   3252  CA  THR C  54      14.798   2.837  -4.158  1.00 30.00           C
ATOM   3253  C   THR C  54      13.949   1.575  -3.988  1.00 30.00           C
ATOM   3254  O   THR C  54      13.426   1.047  -4.971  1.00 30.00           O
ATOM   3255  N   ASP C  55      13.852   1.144  -2.742  1.00 30.00           N
ATOM   3256  CA  ASP C  55      13.017  -0.043  -2.500  1.00 30.00           C
ATOM   3257  C   ASP C  55      12.344   0.081  -1.152  1.00 30.00           C
ATOM   3258  O   ASP C  55      12.888   0.658  -0.214  1.00 30.00           O
ATOM   3259  N   VAL C  56      11.111  -0.397  -1.064  1.00 30.00           N
ATOM   3260  CA  VAL C  56      10.342  -0.384   0.165  1.00 30.00           C
ATOM   3261  C   VAL C  56       9.519  -1.676   0.152  1.00 30.00           C
ATOM   3262  O   VAL C  56       9.008  -2.074  -0.883  1.00 30.00           O
ATOM   3263  N   ASN C  57       9.459  -2.328   1.292  1.00 30.00           N
ATOM   3264  CA  ASN C  57       8.718  -3.581   1.417  1.00 30.00           C
ATOM   3265  C   ASN C  57       8.135  -3.695   2.824  1.00 30.00           C
ATOM   3266  O   ASN C  57       8.794  -3.418   3.833  1.00 30.00           O
ATOM   3267  N   LYS C  58       6.882  -4.100   2.859  1.00 30.00           N
ATOM   3268  CA  LYS C  58       6.124  -4.221   4.081  1.00 30.00           C
ATOM   3269  C   LYS C  58       5.507  -5.600   4.253  1.00 30.00           C
ATOM   3270  O   LYS C  58       5.139  -6.262   3.296  1.00 30.00           O
ATOM   3271  CB  LYS C  58       4.982  -3.190   4.124  1.00 30.00           C
ATOM   3272  CG  LYS C  58       5.446  -1.743   3.915  1.00110.00           C
ATOM   3273  CD  LYS C  58       4.326  -0.721   4.138  1.00110.00           C
ATOM   3274  CE  LYS C  58       3.115  -0.855   3.225  1.00110.00           C
ATOM   3275  NZ  LYS C  58       3.452  -0.534   1.827  1.00110.00           N1+
ATOM   3276  N   GLU C  59       5.308  -5.978   5.508  1.00 30.00           N
ATOM   3277  CA  GLU C  59       4.722  -7.249   5.869  1.00 30.00           C
ATOM   3278  C   GLU C  59       3.388  -6.971   6.564  1.00 30.00           C
ATOM   3279  O   GLU C  59       3.406  -6.257   7.564  1.00 30.00           O
ATOM   3280  N   PHE C  60       2.302  -7.477   6.026  1.00 30.00           N
ATOM   3281  CA  PHE C  60       0.984  -7.341   6.612  1.00 30.00           C
ATOM   3282  C   PHE C  60       0.538  -8.734   7.107  1.00 30.00           C
ATOM   3283  O   PHE C  60       0.353  -9.609   6.253  1.00 30.00           O
ATOM   3284  CB  PHE C  60      -0.030  -6.752   5.606  1.00 30.00           C
ATOM   3285  CG  PHE C  60       0.114  -5.292   5.194  1.00 30.00           C
ATOM   3286  CD1 PHE C  60       0.929  -4.361   5.850  1.00 30.00           C
ATOM   3287  CD2 PHE C  60      -0.672  -4.831   4.126  1.00 30.00           C
ATOM   3288  CE1 PHE C  60       0.966  -3.023   5.446  1.00 30.00           C
ATOM   3289  CE2 PHE C  60      -0.611  -3.504   3.696  1.00 30.00           C
ATOM   3290  CZ  PHE C  60       0.196  -2.595   4.369  1.00 30.00           C
ATOM   3291  N   GLN C  61       0.434  -8.950   8.426  1.00110.00           N
ATOM   3292  CA  GLN C  61       0.052 -10.245   8.976  1.00110.00           C
ATOM   3293  C   GLN C  61      -0.092 -10.182  10.485  1.00110.00           C
ATOM   3294  O   GLN C  61       0.303  -9.197  11.107  1.00110.00           O
ATOM   3295  N   MET C  62      -0.645 -11.277  11.020  1.00110.00           N
ATOM   3296  CA  MET C  62      -0.848 -11.531  12.442  1.00110.00           C
ATOM   3297  C   MET C  62      -1.675 -10.386  13.045  1.00110.00           C
ATOM   3298  O   MET C  62      -1.436  -9.941  14.166  1.00110.00           O
ATOM   3299  N   GLY C  63      -2.626  -9.877  12.253  1.00110.00           N
ATOM   3300  CA  GLY C  63      -3.395  -8.707  12.490  1.00110.00           C
ATOM   3301  C   GLY C  63      -2.625  -7.478  12.601  1.00110.00           C
ATOM   3302  O   GLY C  63      -1.700  -7.230  11.835  1.00110.00           O
ATOM   3303  N   PRO C  87      -2.971  -6.671  13.609  1.00110.00           N
ATOM   3304  CA  PRO C  87      -2.265  -5.491  14.095  1.00110.00           C
ATOM   3305  C   PRO C  87      -0.831  -5.731  14.595  1.00110.00           C
ATOM   3306  O   PRO C  87      -0.496  -5.320  15.706  1.00110.00           O
ATOM   3307  N   ALA C  88       0.017  -6.365  13.783  1.00110.00           N
ATOM   3308  CA  ALA C  88       1.418  -6.632  14.109  1.00110.00           C
ATOM   3309  C   ALA C  88       2.235  -6.812  12.822  1.00110.00           C
ATOM   3310  O   ALA C  88       2.742  -7.897  12.542  1.00110.00           O
ATOM   3311  N   TYR C  89       2.342  -5.736  12.044  1.00110.00           N
ATOM   3312  CA  TYR C  89       3.051  -5.707  10.769  1.00110.00           C
ATOM   3313  C   TYR C  89       4.301  -4.840  10.855  1.00110.00           C
ATOM   3314  O   TYR C  89       4.605  -4.280  11.909  1.00110.00           O
ATOM   3315  CB  TYR C  89       2.118  -5.167   9.658  1.00110.00           C
ATOM   3316  CG  TYR C  89       0.897  -4.332   9.937  1.00110.00           C
ATOM   3317  CD1 TYR C  89      -0.273  -4.955  10.381  1.00110.00           C
ATOM   3318  CD2 TYR C  89       0.857  -2.979   9.601  1.00110.00           C
ATOM   3319  CE1 TYR C  89      -1.457  -4.241  10.540  1.00110.00           C
ATOM   3320  CE2 TYR C  89      -0.339  -2.275   9.716  1.00110.00           C
ATOM   3321  CZ  TYR C  89      -1.474  -2.896  10.221  1.00110.00           C
ATOM   3322  OH  TYR C  89      -2.617  -2.158  10.330  1.00110.00           O
ATOM   3323  N   GLY C  90       5.049  -4.729   9.744  1.00 30.00           N
ATOM   3324  CA  GLY C  90       6.255  -3.923   9.768  1.00 30.00           C
ATOM   3325  C   GLY C  90       6.875  -3.745   8.385  1.00 30.00           C
ATOM   3326  O   GLY C  90       6.630  -4.451   7.417  1.00 30.00           O
ATOM   3327  N   LYS C  91       7.683  -2.702   8.340  1.00 30.00           N
ATOM   3328  CA  LYS C  91       8.454  -2.398   7.146  1.00 30.00           C
ATOM   3329  C   LYS C  91       9.646  -3.352   7.217  1.00 30.00           C
ATOM   3330  O   LYS C  91      10.337  -3.381   8.246  1.00 30.00           O
ATOM   3331  CB  LYS C  91       8.930  -0.940   6.997  1.00 30.00           C
ATOM   3332  CG  LYS C  91       9.303  -0.182   8.277  1.00110.00           C
ATOM   3333  CD  LYS C  91       8.272   0.887   8.668  1.00110.00           C
ATOM   3334  CE  LYS C  91       6.898   0.319   8.997  1.00110.00           C
ATOM   3335  NZ  LYS C  91       6.002   1.399   9.433  1.00110.00           N1+
ATOM   3336  N   HIS C  92       9.923  -4.049   6.142  1.00 30.00           N
ATOM   3337  CA  HIS C  92      11.088  -4.946   6.151  1.00 30.00           C
ATOM   3338  C   HIS C  92      12.310  -4.233   5.589  1.00 30.00           C
ATOM   3339  O   HIS C  92      13.429  -4.325   6.090  1.00 30.00           O
ATOM   3340  CB  HIS C  92      10.761  -6.195   5.297  1.00 30.00           C
ATOM   3341  CG  HIS C  92      11.643  -7.370   5.579  1.00110.00           C
ATOM   3342  ND1 HIS C  92      11.612  -8.067   6.766  1.00110.00           N
ATOM   3343  CD2 HIS C  92      12.577  -8.031   4.810  1.00110.00           C
ATOM   3344  CE1 HIS C  92      12.534  -9.074   6.673  1.00110.00           C
ATOM   3345  NE2 HIS C  92      13.133  -9.078   5.503  1.00110.00           N
ATOM   3346  N   MET C  93      12.117  -3.505   4.494  1.00 30.00           N
ATOM   3347  CA  MET C  93      13.147  -2.799   3.771  1.00 30.00           C
ATOM   3348  C   MET C  93      12.707  -1.378   3.413  1.00 30.00           C
ATOM   3349  O   MET C  93      11.548  -1.186   3.063  1.00 30.00           O
ATOM   3350  N   GLN C  94      13.628  -0.429   3.506  1.00 30.00           N
ATOM   3351  CA  GLN C  94      13.340   0.964   3.112  1.00 30.00           C
ATOM   3352  C   GLN C  94      14.702   1.645   2.890  1.00 30.00           C
ATOM   3353  O   GLN C  94      15.385   2.006   3.839  1.00 30.00           O
ATOM   3354  N   ASP C  95      15.116   1.762   1.629  1.00 30.00           N
ATOM   3355  CA  ASP C  95      16.391   2.352   1.293  1.00 30.00           C
ATOM   3356  C   ASP C  95      16.377   2.977  -0.094  1.00 30.00           C
ATOM   3357  O   ASP C  95      15.546   2.629  -0.920  1.00 30.00           O
ATOM   3358  N   ALA C  96      17.338   3.884  -0.284  1.00 30.00           N
ATOM   3359  CA  ALA C  96      17.509   4.526  -1.581  1.00 30.00           C
ATOM   3360  C   ALA C  96      19.029   4.549  -1.833  1.00 30.00           C
ATOM   3361  O   ALA C  96      19.829   4.549  -0.887  1.00 30.00           O
ATOM   3362  N   GLU C  97      19.428   4.544  -3.098  1.00 30.00           N
ATOM   3363  CA  GLU C  97      20.829   4.560  -3.422  1.00 30.00           C
ATOM   3364  C   GLU C  97      21.114   4.994  -4.861  1.00 30.00           C
ATOM   3365  O   GLU C  97      20.229   5.289  -5.656  1.00 30.00           O
ATOM   3366  N   MET C  98      22.407   4.964  -5.156  1.00 30.00           N
ATOM   3367  CA  MET C  98      22.925   5.338  -6.462  1.00 30.00           C
ATOM   3368  C   MET C  98      23.923   4.280  -6.918  1.00 30.00           C
ATOM   3369  O   MET C  98      24.685   3.751  -6.105  1.00 30.00           O
ATOM   3370  N   PHE C  99      23.919   3.970  -8.198  1.00 30.00           N
ATOM   3371  CA  PHE C  99      24.843   3.007  -8.776  1.00 30.00           C
ATOM   3372  C   PHE C  99      25.566   3.712  -9.931  1.00 30.00           C
ATOM   3373  O   PHE C  99      24.958   4.338 -10.800  1.00 30.00           O
ATOM   3374  CB  PHE C  99      24.085   1.750  -9.251  1.00 30.00           C
ATOM   3375  CG  PHE C  99      24.822   0.757 -10.123  1.00110.00           C
ATOM   3376  CD1 PHE C  99      26.140   0.365  -9.870  1.00110.00           C
ATOM   3377  CD2 PHE C  99      24.149   0.163 -11.201  1.00110.00           C
ATOM   3378  CE1 PHE C  99      26.793  -0.534 -10.715  1.00110.00           C
ATOM   3379  CE2 PHE C  99      24.797  -0.735 -12.048  1.00110.00           C
ATOM   3380  CZ  PHE C  99      26.125  -1.071 -11.812  1.00110.00           C
ATOM   3381  N   THR C 100      26.898   3.684  -9.914  1.00 30.00           N
ATOM   3382  CA  THR C 100      27.654   4.397 -10.926  1.00 30.00           C
ATOM   3383  C   THR C 100      28.620   3.509 -11.681  1.00 30.00           C
ATOM   3384  O   THR C 100      29.602   3.055 -11.096  1.00 30.00           O
ATOM   3385  N   ASN C 101      28.321   3.211 -12.982  1.00 30.00           N
ATOM   3386  CA  ASN C 101      29.278   2.640 -13.929  1.00 30.00           C
ATOM   3387  C   ASN C 101      29.837   1.308 -13.377  1.00 30.00           C
ATOM   3388  O   ASN C 101      29.098   0.373 -13.051  1.00 30.00           O
ATOM   3389  N   ALA C 102      31.200   1.267 -13.194  1.00 30.00           N
ATOM   3390  CA  ALA C 102      31.886   0.185 -12.504  1.00 30.00           C
ATOM   3391  C   ALA C 102      32.491   0.652 -11.185  1.00 30.00           C
ATOM   3392  O   ALA C 102      33.338  -0.056 -10.632  1.00 30.00           O
ATOM   3393  N   ALA C 103      32.163   1.836 -10.710  1.00 30.00           N
ATOM   3394  CA  ALA C 103      32.707   2.356  -9.453  1.00 30.00           C
ATOM   3395  C   ALA C 103      32.030   1.756  -8.234  1.00 30.00           C
ATOM   3396  O   ALA C 103      32.597   1.699  -7.140  1.00 30.00           O
ATOM   3397  N   TYR C 104      30.790   1.308  -8.398  1.00 30.00           N
ATOM   3398  CA  TYR C 104      30.012   0.701  -7.341  1.00 30.00           C
ATOM   3399  C   TYR C 104      28.655   1.358  -7.092  1.00 30.00           C
ATOM   3400  O   TYR C 104      28.199   2.308  -7.724  1.00 30.00           O
ATOM   3401  CB  TYR C 104      30.710   0.788  -5.878  1.00 30.00           C
ATOM   3402  CG  TYR C 104      30.857   2.123  -5.120  1.00110.00           C
ATOM   3403  CD1 TYR C 104      30.522   3.382  -5.642  1.00110.00           C
ATOM   3404  CD2 TYR C 104      31.384   2.075  -3.816  1.00110.00           C
ATOM   3405  CE1 TYR C 104      30.675   4.544  -4.879  1.00110.00           C
ATOM   3406  CE2 TYR C 104      31.549   3.235  -3.054  1.00110.00           C
ATOM   3407  CZ  TYR C 104      31.183   4.463  -3.589  1.00110.00           C
ATOM   3408  OH  TYR C 104      31.315   5.619  -2.878  1.00110.00           O
ATOM   3409  N   MET C 105      27.994   0.826  -6.080  1.00 30.00           N
ATOM   3410  CA  MET C 105      26.707   1.334  -5.618  1.00 30.00           C
ATOM   3411  C   MET C 105      26.817   1.695  -4.144  1.00 30.00           C
ATOM   3412  O   MET C 105      27.656   1.220  -3.389  1.00 30.00           O
ATOM   3413  N   ALA C 106      25.995   2.640  -3.752  1.00 30.00           N
ATOM   3414  CA  ALA C 106      25.906   3.080  -2.374  1.00 30.00           C
ATOM   3415  C   ALA C 106      24.428   3.266  -2.048  1.00 30.00           C
ATOM   3416  O   ALA C 106      23.750   3.949  -2.836  1.00 30.00           O
ATOM   3417  N   LEU C 107      23.989   2.705  -0.922  1.00 30.00           N
ATOM   3418  CA  LEU C 107      22.601   2.904  -0.522  1.00 30.00           C
ATOM   3419  C   LEU C 107      22.572   3.072   0.992  1.00 30.00           C
ATOM   3420  O   LEU C 107      23.532   2.744   1.684  1.00 30.00           O
ATOM   3421  N   ASN C 108      21.502   3.686   1.487  1.00 30.00           N
ATOM   3422  CA  ASN C 108      21.363   3.915   2.910  1.00 30.00           C
ATOM   3423  C   ASN C 108      19.891   3.677   3.276  1.00 30.00           C
ATOM   3424  O   ASN C 108      18.997   4.005   2.499  1.00 30.00           O
ATOM   3425  N   ILE C 109      19.654   3.131   4.461  1.00 30.00           N
ATOM   3426  CA  ILE C 109      18.319   2.911   4.976  1.00 30.00           C
ATOM   3427  C   ILE C 109      18.212   1.578   5.711  1.00 30.00           C
ATOM   3428  O   ILE C 109      19.185   1.113   6.306  1.00 30.00           O
ATOM   3429  N   TRP C 110      17.009   0.995   5.695  1.00 30.00           N
ATOM   3430  CA  TRP C 110      16.785  -0.301   6.305  1.00 30.00           C
ATOM   3431  C   TRP C 110      17.084  -1.330   5.201  1.00 30.00           C
ATOM   3432  O   TRP C 110      16.390  -1.356   4.191  1.00 30.00           O
ATOM   3433  CB  TRP C 110      15.355  -0.481   6.838  1.00 30.00           C
ATOM   3434  CG  TRP C 110      15.127  -1.657   7.758  1.00110.00           C
ATOM   3435  CD1 TRP C 110      15.684  -2.919   7.681  1.00110.00           C
ATOM   3436  CD2 TRP C 110      14.215  -1.697   8.871  1.00110.00           C
ATOM   3437  NE1 TRP C 110      15.169  -3.701   8.685  1.00110.00           N
ATOM   3438  CE3 TRP C 110      13.332  -0.764   9.452  1.00110.00           C
ATOM   3439  CE2 TRP C 110      14.271  -2.975   9.429  1.00110.00           C
ATOM   3440  CZ3 TRP C 110      12.556  -1.128  10.560  1.00110.00           C
ATOM   3441  CZ2 TRP C 110      13.504  -3.360  10.535  1.00110.00           C
ATOM   3442  CH2 TRP C 110      12.644  -2.410  11.093  1.00110.00           C
ATOM   3443  N   ASP C 111      18.114  -2.125   5.417  1.00 30.00           N
ATOM   3444  CA  ASP C 111      18.550  -3.101   4.419  1.00 30.00           C
ATOM   3445  C   ASP C 111      19.173  -4.303   5.115  1.00 30.00           C
ATOM   3446  O   ASP C 111      19.178  -4.422   6.345  1.00 30.00           O
ATOM   3447  N   ARG C 112      18.486  -4.833   4.546  1.00 30.00           N
ATOM   3448  CA  ARG C 112      19.245  -5.968   5.056  1.00 30.00           C
ATOM   3449  C   ARG C 112      20.668  -5.419   5.079  1.00 30.00           C
ATOM   3450  O   ARG C 112      21.035  -4.622   4.215  1.00 30.00           O
ATOM   3451  CB  ARG C 112      19.161  -7.114   4.008  1.00 30.00           C
ATOM   3452  CG  ARG C 112      17.740  -7.524   3.581  1.00110.00           C
ATOM   3453  CD  ARG C 112      16.674  -7.574   4.668  1.00110.00           C
ATOM   3454  NE  ARG C 112      16.967  -8.562   5.708  1.00110.00           N
ATOM   3455  CZ  ARG C 112      16.682  -9.873   5.639  1.00110.00           C
ATOM   3456  NH1 ARG C 112      16.204 -10.441   4.532  1.00110.00           N
ATOM   3457  NH2 ARG C 112      16.900 -10.643   6.709  1.00110.00           N1+
ATOM   3458  N   PHE C 113      24.653  -5.699   4.493  1.00 30.00           N1+
ATOM   3459  CA  PHE C 113      25.395  -6.483   3.496  1.00 30.00           C
ATOM   3460  C   PHE C 113      25.701  -7.936   3.849  1.00 30.00           C
ATOM   3461  O   PHE C 113      25.544  -8.830   3.011  1.00 30.00           O
ATOM   3462  CB  PHE C 113      26.468  -5.672   2.788  1.00 30.00           C
ATOM   3463  CG  PHE C 113      25.893  -5.080   1.489  1.00110.00           C
ATOM   3464  CD1 PHE C 113      25.131  -5.842   0.566  1.00110.00           C
ATOM   3465  CD2 PHE C 113      26.190  -3.769   1.139  1.00110.00           C
ATOM   3466  CE1 PHE C 113      24.557  -5.274  -0.568  1.00110.00           C
ATOM   3467  CE2 PHE C 113      25.683  -3.229  -0.047  1.00110.00           C
ATOM   3468  CZ  PHE C 113      24.811  -3.950  -0.857  1.00110.00           C
ATOM   3469  N   ASP C 114      26.116  -8.208   5.086  1.00110.00           N
ATOM   3470  CA  ASP C 114      26.440  -9.560   5.526  1.00110.00           C
ATOM   3471  C   ASP C 114      25.173 -10.434   5.464  1.00110.00           C
ATOM   3472  O   ASP C 114      25.191 -11.517   4.880  1.00110.00           O
ATOM   3473  N   VAL C 115      24.065  -9.912   5.999  1.00110.00           N
ATOM   3474  CA  VAL C 115      22.751 -10.555   6.015  1.00110.00           C
ATOM   3475  C   VAL C 115      22.329 -10.933   4.583  1.00110.00           C
ATOM   3476  O   VAL C 115      22.160 -12.109   4.262  1.00110.00           O
ATOM   3477  N   PHE C 116      22.187  -9.911   3.736  1.00110.00           N
ATOM   3478  CA  PHE C 116      21.760  -9.979   2.341  1.00110.00           C
ATOM   3479  C   PHE C 116      22.446 -11.004   1.475  1.00110.00           C
ATOM   3480  O   PHE C 116      21.784 -11.782   0.784  1.00110.00           O
ATOM   3481  CB  PHE C 116      21.927  -8.598   1.657  1.00110.00           C
ATOM   3482  CG  PHE C 116      21.214  -8.458   0.327  1.00110.00           C
ATOM   3483  CD1 PHE C 116      19.813  -8.432   0.264  1.00110.00           C
ATOM   3484  CD2 PHE C 116      21.942  -8.346  -0.865  1.00110.00           C
ATOM   3485  CE1 PHE C 116      19.158  -8.295  -0.961  1.00110.00           C
ATOM   3486  CE2 PHE C 116      21.286  -8.209  -2.090  1.00110.00           C
ATOM   3487  CZ  PHE C 116      19.894  -8.183  -2.138  1.00110.00           C
ATOM   3488  N   CYS C 117      23.781 -11.029   1.522  1.00 30.00           N
ATOM   3489  CA  CYS C 117      24.561 -11.957   0.718  1.00 30.00           C
ATOM   3490  C   CYS C 117      24.557 -13.386   1.251  1.00 30.00           C
ATOM   3491  O   CYS C 117      24.294 -14.331   0.511  1.00 30.00           O
ATOM   3492  CB  CYS C 117      25.942 -11.353   0.443  1.00 30.00           C
ATOM   3493  SG  CYS C 117      25.882  -9.863  -0.636  1.00110.00           S
ATOM   3494  N   THR C 118      24.819 -13.538   2.541  1.00 30.00           N
ATOM   3495  CA  THR C 118      24.913 -14.864   3.140  1.00 30.00           C
ATOM   3496  C   THR C 118      23.654 -15.706   3.310  1.00 30.00           C
ATOM   3497  O   THR C 118      23.748 -16.932   3.389  1.00 30.00           O
ATOM   3498  N   LEU C 119      22.479 -15.079   3.364  1.00 30.00           N
ATOM   3499  CA  LEU C 119      21.250 -15.857   3.499  1.00 30.00           C
ATOM   3500  C   LEU C 119      20.896 -16.502   2.157  1.00 30.00           C
ATOM   3501  O   LEU C 119      20.012 -17.353   2.079  1.00 30.00           O
ATOM   3502  N   GLY C 120      21.597 -16.106   1.098  1.00 30.00           N
ATOM   3503  CA  GLY C 120      21.335 -16.675  -0.219  1.00 30.00           C
ATOM   3504  C   GLY C 120      21.736 -18.150  -0.270  1.00 30.00           C
ATOM   3505  O   GLY C 120      21.347 -18.868  -1.190  1.00 30.00           O
ATOM   3506  N   ALA C 121      22.503 -18.607   0.718  1.00 30.00           N
ATOM   3507  CA  ALA C 121      22.928 -20.010   0.754  1.00 30.00           C
ATOM   3508  C   ALA C 121      21.921 -20.891   1.498  1.00 30.00           C
ATOM   3509  O   ALA C 121      22.055 -22.110   1.543  1.00 30.00           O
ATOM   3510  N   THR C 122      20.904 -20.260   2.073  1.00 30.00           N
ATOM   3511  CA  THR C 122      19.860 -20.968   2.797  1.00 30.00           C
ATOM   3512  C   THR C 122      18.860 -21.421   1.736  1.00 30.00           C
ATOM   3513  O   THR C 122      18.215 -20.593   1.102  1.00 30.00           O
ATOM   3514  N   THR C 123      18.731 -22.725   1.530  1.00 30.00           N
ATOM   3515  CA  THR C 123      17.805 -23.230   0.520  1.00 30.00           C
ATOM   3516  C   THR C 123      16.351 -22.910   0.839  1.00 30.00           C
ATOM   3517  O   THR C 123      15.493 -22.995  -0.036  1.00 30.00           O
ATOM   3518  N   GLY C 124      16.065 -22.547   2.087  1.00 30.00           N
ATOM   3519  CA  GLY C 124      14.697 -22.208   2.459  1.00 30.00           C
ATOM   3520  C   GLY C 124      14.450 -20.707   2.609  1.00 30.00           C
ATOM   3521  O   GLY C 124      13.484 -20.272   3.232  1.00 30.00           O
ATOM   3522  N   TYR C 125      15.343 -19.929   2.012  1.00 30.00           N
ATOM   3523  CA  TYR C 125      15.252 -18.477   1.973  1.00 30.00           C
ATOM   3524  C   TYR C 125      14.897 -17.747   3.263  1.00 30.00           C
ATOM   3525  O   TYR C 125      14.068 -16.833   3.253  1.00 30.00           O
ATOM   3526  CB  TYR C 125      14.294 -18.050   0.827  1.00 30.00           C
ATOM   3527  CG  TYR C 125      14.729 -18.566  -0.532  1.00110.00           C
ATOM   3528  CD1 TYR C 125      15.775 -17.943  -1.227  1.00110.00           C
ATOM   3529  CD2 TYR C 125      14.117 -19.698  -1.091  1.00110.00           C
ATOM   3530  CE1 TYR C 125      16.206 -18.447  -2.455  1.00110.00           C
ATOM   3531  CE2 TYR C 125      14.548 -20.203  -2.319  1.00110.00           C
ATOM   3532  CZ  TYR C 125      15.591 -19.574  -2.991  1.00110.00           C
ATOM   3533  OH  TYR C 125      16.048 -20.040  -4.191  1.00110.00           O
ATOM   3534  N   LEU C 126      15.531 -18.142   4.362  1.00 30.00           N
ATOM   3535  CA  LEU C 126      15.314 -17.502   5.655  1.00 30.00           C
ATOM   3536  C   LEU C 126      13.849 -17.310   6.048  1.00 30.00           C
ATOM   3537  O   LEU C 126      13.510 -16.329   6.708  1.00 30.00           O
ATOM   3538  N   LYS C 127      12.979 -18.230   5.644  1.00 30.00           N
ATOM   3539  CA  LYS C 127      11.566 -18.124   6.001  1.00 30.00           C
ATOM   3540  C   LYS C 127      10.966 -19.525   6.140  1.00 30.00           C
ATOM   3541  O   LYS C 127      11.593 -20.514   5.755  1.00 30.00           O
ATOM   3542  CB  LYS C 127      10.782 -17.245   5.008  1.00 30.00           C
ATOM   3543  CG  LYS C 127      10.713 -17.781   3.573  1.00110.00           C
ATOM   3544  CD  LYS C 127      10.032 -16.758   2.656  1.00110.00           C
ATOM   3545  CE  LYS C 127      10.035 -17.205   1.201  1.00110.00           C
ATOM   3546  NZ  LYS C 127       9.347 -16.189   0.377  1.00110.00           N1+
ATOM   3547  N   GLY C 128       9.762 -19.608   6.699  1.00 30.00           N
ATOM   3548  CA  GLY C 128       9.123 -20.901   6.866  1.00 30.00           C
ATOM   3549  C   GLY C 128       9.519 -21.570   8.169  1.00 30.00           C
ATOM   3550  O   GLY C 128      10.326 -21.027   8.923  1.00 30.00           O
ATOM   3551  N   ASN C 129       8.961 -22.752   8.424  1.00 30.00           N
ATOM   3552  CA  ASN C 129       9.237 -23.504   9.653  1.00 30.00           C
ATOM   3553  C   ASN C 129      10.677 -23.899   9.901  1.00 30.00           C
ATOM   3554  O   ASN C 129      11.113 -23.924  11.049  1.00 30.00           O
ATOM   3555  N   SER C 130      11.417 -24.221   8.848  1.00 30.00           N
ATOM   3556  CA  SER C 130      12.790 -24.645   9.057  1.00 30.00           C
ATOM   3557  C   SER C 130      13.904 -24.036   8.228  1.00 30.00           C
ATOM   3558  O   SER C 130      14.579 -24.748   7.491  1.00 30.00           O
ATOM   3559  N   ALA C 131      14.122 -22.716   8.312  1.00 30.00           N
ATOM   3560  CA  ALA C 131      15.210 -22.136   7.520  1.00 30.00           C
ATOM   3561  C   ALA C 131      16.475 -22.205   8.376  1.00 30.00           C
ATOM   3562  O   ALA C 131      16.467 -22.800   9.454  1.00 30.00           O
ATOM   3563  N   SER C 132      17.558 -21.605   7.899  1.00 30.00           N
ATOM   3564  CA  SER C 132      18.791 -21.562   8.675  1.00 30.00           C
ATOM   3565  C   SER C 132      18.535 -20.535   9.782  1.00 30.00           C
ATOM   3566  O   SER C 132      18.207 -19.383   9.491  1.00 30.00           O
ATOM   3567  N   PHE C 133      18.693 -20.940  11.039  1.00 30.00           N
ATOM   3568  CA  PHE C 133      18.436 -20.051  12.173  1.00 30.00           C
ATOM   3569  C   PHE C 133      19.647 -19.360  12.805  1.00 30.00           C
ATOM   3570  O   PHE C 133      19.549 -18.831  13.912  1.00 30.00           O
ATOM   3571  CB  PHE C 133      17.623 -20.799  13.264  1.00 30.00           C
ATOM   3572  CG  PHE C 133      16.148 -20.907  12.928  1.00110.00           C
ATOM   3573  CD1 PHE C 133      15.307 -19.791  13.059  1.00110.00           C
ATOM   3574  CD2 PHE C 133      15.605 -22.113  12.475  1.00110.00           C
ATOM   3575  CE1 PHE C 133      13.952 -19.879  12.733  1.00110.00           C
ATOM   3576  CE2 PHE C 133      14.251 -22.196  12.147  1.00110.00           C
ATOM   3577  CZ  PHE C 133      13.424 -21.083  12.275  1.00110.00           C
ATOM   3578  N   ASN C 134      20.781 -19.354  12.107  1.00 30.00           N
ATOM   3579  CA  ASN C 134      21.969 -18.717  12.648  1.00 30.00           C
ATOM   3580  C   ASN C 134      21.807 -17.227  12.904  1.00 30.00           C
ATOM   3581  O   ASN C 134      22.387 -16.678  13.846  1.00 30.00           O
ATOM   3582  N   LEU C 135      21.031 -16.560  12.057  1.00 30.00           N
ATOM   3583  CA  LEU C 135      20.800 -15.132  12.209  1.00 30.00           C
ATOM   3584  C   LEU C 135      19.687 -14.876  13.224  1.00 30.00           C
ATOM   3585  O   LEU C 135      18.527 -14.688  12.859  1.00 30.00           O
ATOM   3586  N   VAL C 136      20.040 -14.906  14.504  1.00 30.00           N
ATOM   3587  CA  VAL C 136      19.063 -14.641  15.547  1.00 30.00           C
ATOM   3588  C   VAL C 136      19.738 -14.051  16.772  1.00 30.00           C
ATOM   3589  O   VAL C 136      20.969 -14.044  16.880  1.00 30.00           O
ATOM   3590  N   GLY C 137      18.915 -13.536  17.677  1.00 30.00           N
ATOM   3591  CA  GLY C 137      19.376 -12.893  18.904  1.00 30.00           C
ATOM   3592  C   GLY C 137      19.669 -13.963  19.955  1.00 30.00           C
ATOM   3593  O   GLY C 137      18.884 -14.161  20.866  1.00 30.00           O
ATOM   3594  N   LEU C 138      20.808 -14.639  19.830  1.00 30.00           N
ATOM   3595  CA  LEU C 138      21.171 -15.709  20.760  1.00 30.00           C
ATOM   3596  C   LEU C 138      21.363 -15.289  22.209  1.00 30.00           C
ATOM   3597  O   LEU C 138      21.110 -16.076  23.124  1.00 30.00           O
ATOM   3598  N   PHE C 139      21.817 -14.059  22.427  1.00 30.00           N
ATOM   3599  CA  PHE C 139      22.081 -13.590  23.785  1.00 30.00           C
ATOM   3600  C   PHE C 139      20.972 -12.763  24.418  1.00 30.00           C
ATOM   3601  O   PHE C 139      21.149 -12.220  25.503  1.00 30.00           O
ATOM   3602  CB  PHE C 139      23.345 -12.690  23.790  1.00 30.00           C
ATOM   3603  CG  PHE C 139      24.661 -13.431  23.829  1.00110.00           C
ATOM   3604  CD1 PHE C 139      25.174 -13.897  25.048  1.00110.00           C
ATOM   3605  CD2 PHE C 139      25.419 -13.594  22.666  1.00110.00           C
ATOM   3606  CE1 PHE C 139      26.439 -14.484  25.105  1.00110.00           C
ATOM   3607  CE2 PHE C 139      26.690 -14.166  22.726  1.00110.00           C
ATOM   3608  CZ  PHE C 139      27.201 -14.609  23.945  1.00110.00           C
ATOM   3609  N   GLY C 140      19.824 -12.680  23.758  1.00 30.00           N
ATOM   3610  CA  GLY C 140      18.726 -11.884  24.292  1.00 30.00           C
ATOM   3611  C   GLY C 140      19.201 -10.440  24.410  1.00 30.00           C
ATOM   3612  O   GLY C 140      18.932  -9.755  25.402  1.00 30.00           O
ATOM   3613  N   THR C 141      19.940  -9.923  23.417  1.00110.00           N
ATOM   3614  CA  THR C 141      20.392  -8.545  23.328  1.00110.00           C
ATOM   3615  C   THR C 141      19.166  -7.643  23.059  1.00110.00           C
ATOM   3616  O   THR C 141      19.001  -7.087  21.974  1.00110.00           O
ATOM   3617  N   LYS C 142      18.310  -7.515  24.076  1.00110.00           N
ATOM   3618  CA  LYS C 142      16.956  -6.908  24.069  1.00110.00           C
ATOM   3619  C   LYS C 142      16.892  -5.439  24.112  1.00110.00           C
ATOM   3620  O   LYS C 142      15.849  -4.796  24.011  1.00110.00           O
ATOM   3621  CB  LYS C 142      16.134  -7.477  25.254  1.00110.00           C
ATOM   3622  CG  LYS C 142      16.639  -7.056  26.645  1.00110.00           C
ATOM   3623  CD  LYS C 142      15.810  -7.714  27.753  1.00110.00           C
ATOM   3624  CE  LYS C 142      16.296  -7.296  29.136  1.00110.00           C
ATOM   3625  NZ  LYS C 142      15.468  -7.953  30.167  1.00110.00           N1+
ATOM   3626  N   THR C 143      18.085  -4.874  24.259  1.00110.00           N
ATOM   3627  CA  THR C 143      18.364  -3.449  24.232  1.00110.00           C
ATOM   3628  C   THR C 143      18.762  -3.045  22.805  1.00110.00           C
ATOM   3629  O   THR C 143      19.042  -1.872  22.555  1.00110.00           O
ATOM   3630  N   GLN C 144      18.780  -4.016  21.890  1.00110.00           N
ATOM   3631  CA  GLN C 144      19.038  -3.788  20.483  1.00110.00           C
ATOM   3632  C   GLN C 144      17.833  -4.257  19.680  1.00110.00           C
ATOM   3633  O   GLN C 144      17.360  -5.378  19.854  1.00110.00           O
ATOM   3634  N   SER C 145      17.402  -3.407  18.755  1.00 30.00           N
ATOM   3635  CA  SER C 145      16.247  -3.667  17.893  1.00 30.00           C
ATOM   3636  C   SER C 145      16.498  -4.761  16.841  1.00 30.00           C
ATOM   3637  O   SER C 145      15.606  -5.558  16.527  1.00 30.00           O
ATOM   3638  N   SER C 146      17.710  -4.800  16.299  1.00 30.00           N
ATOM   3639  CA  SER C 146      18.032  -5.780  15.276  1.00 30.00           C
ATOM   3640  C   SER C 146      19.195  -6.680  15.658  1.00 30.00           C
ATOM   3641  O   SER C 146      20.115  -6.882  14.871  1.00 30.00           O
ATOM   3642  N   SER C 147      19.143  -7.205  16.888  1.00110.00           N
ATOM   3643  CA  SER C 147      20.139  -8.120  17.406  1.00110.00           C
ATOM   3644  C   SER C 147      20.178  -9.434  16.607  1.00110.00           C
ATOM   3645  O   SER C 147      19.148 -10.097  16.472  1.00110.00           O
ATOM   3646  N   PRO C 155      21.348  -9.825  16.076  1.00110.00           N
ATOM   3647  CA  PRO C 155      22.620  -9.108  16.175  1.00110.00           C
ATOM   3648  C   PRO C 155      22.656  -8.015  15.099  1.00110.00           C
ATOM   3649  O   PRO C 155      22.605  -8.367  13.927  1.00110.00           O
ATOM   3650  N   ASN C 156      22.689  -6.729  15.493  1.00110.00           N
ATOM   3651  CA  ASN C 156      22.788  -5.483  14.636  1.00110.00           C
ATOM   3652  C   ASN C 156      21.677  -4.533  14.027  1.00110.00           C
ATOM   3653  O   ASN C 156      21.292  -4.817  12.900  1.00110.00           O
ATOM   3654  N   THR C 157      21.160  -3.481  14.709  1.00110.00           N
ATOM   3655  CA  THR C 157      20.111  -2.551  14.211  1.00110.00           C
ATOM   3656  C   THR C 157      20.336  -2.186  12.754  1.00110.00           C
ATOM   3657  O   THR C 157      21.405  -1.666  12.454  1.00110.00           O
ATOM   3658  N   ALA C 158      19.345  -2.463  11.897  1.00110.00           N
ATOM   3659  CA  ALA C 158      19.472  -2.295  10.455  1.00110.00           C
ATOM   3660  C   ALA C 158      18.982  -0.904  10.044  1.00110.00           C
ATOM   3661  O   ALA C 158      18.988  -0.571   8.863  1.00110.00           O
ATOM   3662  N   LEU C 159      18.597  -0.054  11.006  1.00 30.00           N
ATOM   3663  CA  LEU C 159      18.083   1.298  10.790  1.00 30.00           C
ATOM   3664  C   LEU C 159      19.291   2.188  10.496  1.00 30.00           C
ATOM   3665  O   LEU C 159      20.424   1.800  10.768  1.00 30.00           O
ATOM   3666  N   ASN C 160      19.042   3.367   9.930  1.00 30.00           N
ATOM   3667  CA  ASN C 160      20.101   4.340   9.679  1.00 30.00           C
ATOM   3668  C   ASN C 160      21.294   3.765   8.936  1.00 30.00           C
ATOM   3669  O   ASN C 160      22.442   4.148   9.197  1.00 30.00           O
ATOM   3670  N   GLU C 161      21.025   2.872   7.992  1.00 30.00           N
ATOM   3671  CA  GLU C 161      22.082   2.211   7.253  1.00 30.00           C
ATOM   3672  C   GLU C 161      22.543   2.861   5.944  1.00 30.00           C
ATOM   3673  O   GLU C 161      21.744   3.390   5.166  1.00 30.00           O
ATOM   3674  N   ALA C 162      23.853   2.823   5.727  1.00 30.00           N
ATOM   3675  CA  ALA C 162      24.455   3.320   4.498  1.00 30.00           C
ATOM   3676  C   ALA C 162      25.267   2.147   3.975  1.00 30.00           C
ATOM   3677  O   ALA C 162      26.144   1.638   4.668  1.00 30.00           O
ATOM   3678  N   VAL C 163      24.953   1.708   2.762  1.00 30.00           N
ATOM   3679  CA  VAL C 163      25.648   0.589   2.144  1.00 30.00           C
ATOM   3680  C   VAL C 163      26.349   0.937   0.836  1.00 30.00           C
ATOM   3681  O   VAL C 163      25.957   1.866   0.121  1.00 30.00           O
ATOM   3682  N   VAL C 164      27.395   0.174   0.537  1.00 30.00           N
ATOM   3683  CA  VAL C 164      28.139   0.333  -0.701  1.00 30.00           C
ATOM   3684  C   VAL C 164      28.424  -1.050  -1.268  1.00 30.00           C
ATOM   3685  O   VAL C 164      29.015  -1.893  -0.595  1.00 30.00           O
ATOM   3686  N   GLU C 165      27.977  -1.273  -2.497  1.00 30.00           N
ATOM   3687  CA  GLU C 165      28.197  -2.539  -3.179  1.00 30.00           C
ATOM   3688  C   GLU C 165      29.036  -2.272  -4.424  1.00 30.00           C
ATOM   3689  O   GLU C 165      28.722  -1.390  -5.227  1.00 30.00           O
ATOM   3690  N   LEU C 166      30.111  -3.034  -4.571  1.00 30.00           N
ATOM   3691  CA  LEU C 166      31.005  -2.884  -5.708  1.00 30.00           C
ATOM   3692  C   LEU C 166      30.415  -3.543  -6.942  1.00 30.00           C
ATOM   3693  O   LEU C 166      29.451  -4.307  -6.857  1.00 30.00           O
ATOM   3694  N   TYR C 167      30.971  -3.225  -8.120  1.00 30.00           N
ATOM   3695  CA  TYR C 167      30.444  -3.860  -9.325  1.00 30.00           C
ATOM   3696  C   TYR C 167      31.109  -5.229  -9.329  1.00 30.00           C
ATOM   3697  O   TYR C 167      31.926  -5.516  -8.451  1.00 30.00           O
ATOM   3698  CB  TYR C 167      30.885  -3.020 -10.547  1.00 30.00           C
ATOM   3699  CG  TYR C 167      30.364  -3.457 -11.899  1.00110.00           C
ATOM   3700  CD1 TYR C 167      28.991  -3.591 -12.140  1.00110.00           C
ATOM   3701  CD2 TYR C 167      31.263  -3.728 -12.943  1.00110.00           C
ATOM   3702  CE1 TYR C 167      28.527  -4.002 -13.392  1.00110.00           C
ATOM   3703  CE2 TYR C 167      30.800  -4.133 -14.197  1.00110.00           C
ATOM   3704  CZ  TYR C 167      29.433  -4.267 -14.411  1.00110.00           C
ATOM   3705  OH  TYR C 167      28.937  -4.661 -15.620  1.00110.00           O
ATOM   3706  N   ILE C 168      30.775  -6.082 -10.287  1.00 30.00           N
ATOM   3707  CA  ILE C 168      31.383  -7.407 -10.325  1.00 30.00           C
ATOM   3708  C   ILE C 168      32.670  -7.373 -11.144  1.00 30.00           C
ATOM   3709  O   ILE C 168      32.701  -6.821 -12.246  1.00 30.00           O
ATOM   3710  N   ASN C 169      33.730  -7.958 -10.594  1.00 30.00           N
ATOM   3711  CA  ASN C 169      35.032  -7.995 -11.257  1.00 30.00           C
ATOM   3712  C   ASN C 169      35.505  -9.427 -11.474  1.00 30.00           C
ATOM   3713  O   ASN C 169      36.190  -9.997 -10.623  1.00 30.00           O
ATOM   3714  N   THR C 170      35.142 -10.002 -12.616  1.00 30.00           N
ATOM   3715  CA  THR C 170      35.541 -11.363 -12.921  1.00 30.00           C
ATOM   3716  C   THR C 170      35.144 -12.329 -11.825  1.00 30.00           C
ATOM   3717  O   THR C 170      35.958 -13.137 -11.374  1.00 30.00           O
ATOM   3718  N   THR C 171      33.892 -12.240 -11.386  1.00 30.00           N
ATOM   3719  CA  THR C 171      33.412 -13.122 -10.337  1.00 30.00           C
ATOM   3720  C   THR C 171      33.463 -12.508  -8.949  1.00 30.00           C
ATOM   3721  O   THR C 171      32.562 -12.734  -8.137  1.00 30.00           O
ATOM   3722  N   PHE C 172      34.510 -11.731  -8.678  1.00 30.00           N
ATOM   3723  CA  PHE C 172      34.671 -11.094  -7.375  1.00 30.00           C
ATOM   3724  C   PHE C 172      33.733  -9.909  -7.160  1.00 30.00           C
ATOM   3725  O   PHE C 172      33.532  -9.079  -8.049  1.00 30.00           O
ATOM   3726  CB  PHE C 172      36.103 -10.563  -7.149  1.00 30.00           C
ATOM   3727  CG  PHE C 172      37.132 -11.654  -6.956  1.00 30.00           C
ATOM   3728  CD1 PHE C 172      37.250 -12.300  -5.716  1.00 30.00           C
ATOM   3729  CD2 PHE C 172      37.980 -12.033  -8.005  1.00 30.00           C
ATOM   3730  CE1 PHE C 172      38.205 -13.301  -5.528  1.00 30.00           C
ATOM   3731  CE2 PHE C 172      38.933 -13.035  -7.815  1.00 30.00           C
ATOM   3732  CZ  PHE C 172      39.046 -13.668  -6.577  1.00 30.00           C
ATOM   3733  N   ALA C 173      33.161  -9.836  -5.964  1.00 30.00           N
ATOM   3734  CA  ALA C 173      32.246  -8.762  -5.615  1.00 30.00           C
ATOM   3735  C   ALA C 173      32.202  -8.617  -4.101  1.00 30.00           C
ATOM   3736  O   ALA C 173      32.319  -9.598  -3.370  1.00 30.00           O
ATOM   3737  N   TRP C 174      32.055  -7.384  -3.630  1.00 30.00           N
ATOM   3738  CA  TRP C 174      32.009  -7.132  -2.195  1.00 30.00           C
ATOM   3739  C   TRP C 174      30.984  -6.067  -1.823  1.00 30.00           C
ATOM   3740  O   TRP C 174      30.501  -5.316  -2.673  1.00 30.00           O
ATOM   3741  CB  TRP C 174      33.350  -6.517  -1.687  1.00 30.00           C
ATOM   3742  CG  TRP C 174      34.713  -7.033  -2.091  1.00110.00           C
ATOM   3743  CD1 TRP C 174      35.113  -8.212  -2.684  1.00110.00           C
ATOM   3744  CD2 TRP C 174      35.932  -6.296  -1.841  1.00110.00           C
ATOM   3745  NE1 TRP C 174      36.475  -8.198  -2.859  1.00110.00           N
ATOM   3746  CE3 TRP C 174      36.216  -5.060  -1.218  1.00110.00           C
ATOM   3747  CE2 TRP C 174      37.001  -7.042  -2.337  1.00110.00           C
ATOM   3748  CZ3 TRP C 174      37.540  -4.615  -1.129  1.00110.00           C
ATOM   3749  CZ2 TRP C 174      38.331  -6.612  -2.260  1.00110.00           C
ATOM   3750  CH2 TRP C 174      38.581  -5.381  -1.646  1.00110.00           C
ATOM   3751  N   SER C 175      30.660  -6.012  -0.539  1.00 30.00           N
ATOM   3752  CA  SER C 175      29.702  -5.039  -0.057  1.00 30.00           C
ATOM   3753  C   SER C 175      30.080  -4.614   1.343  1.00 30.00           C
ATOM   3754  O   SER C 175      30.545  -5.432   2.129  1.00 30.00           O
ATOM   3755  N   VAL C 176      29.891  -3.336   1.650  1.00 30.00           N
ATOM   3756  CA  VAL C 176      30.226  -2.816   2.968  1.00 30.00           C
ATOM   3757  C   VAL C 176      29.085  -1.961   3.487  1.00 30.00           C
ATOM   3758  O   VAL C 176      28.404  -1.298   2.718  1.00 30.00           O
ATOM   3759  N   GLY C 177      28.885  -1.973   4.798  1.00 30.00           N
ATOM   3760  CA  GLY C 177      27.818  -1.175   5.364  1.00 30.00           C
ATOM   3761  C   GLY C 177      28.135  -0.585   6.719  1.00 30.00           C
ATOM   3762  O   GLY C 177      28.964  -1.108   7.463  1.00 30.00           O
ATOM   3763  N   ALA C 178      27.474   0.524   7.033  1.00 30.00           N
ATOM   3764  CA  ALA C 178      27.650   1.185   8.318  1.00 30.00           C
ATOM   3765  C   ALA C 178      26.298   1.720   8.782  1.00 30.00           C
ATOM   3766  O   ALA C 178      25.594   2.381   8.025  1.00 30.00           O
ATOM   3767  N   ARG C 179      25.933   1.426  10.022  1.00 30.00           N
ATOM   3768  CA  ARG C 179      24.672   1.916  10.560  1.00 30.00           C
ATOM   3769  C   ARG C 179      24.951   2.772  11.785  1.00 30.00           C
ATOM   3770  O   ARG C 179      25.627   2.331  12.722  1.00 30.00           O
ATOM   3771  CB  ARG C 179      23.799   0.739  10.962  1.00 30.00           C
ATOM   3772  CG  ARG C 179      23.434  -0.083   9.735  1.00110.00           C
ATOM   3773  CD  ARG C 179      22.607  -1.272  10.102  1.00110.00           C
ATOM   3774  NE  ARG C 179      22.417  -2.244   9.029  1.00110.00           N
ATOM   3775  CZ  ARG C 179      22.532  -3.582   9.120  1.00110.00           C
ATOM   3776  NH1 ARG C 179      22.739  -4.192  10.277  1.00110.00           N
ATOM   3777  NH2 ARG C 179      22.394  -4.318   8.022  1.00110.00           N1+
ATOM   3778  N   ALA C 180      24.432   3.995  11.766  1.00 30.00           N
ATOM   3779  CA  ALA C 180      24.617   4.922  12.866  1.00 30.00           C
ATOM   3780  C   ALA C 180      23.802   4.530  14.088  1.00 30.00           C
ATOM   3781  O   ALA C 180      22.611   4.236  13.985  1.00 30.00           O
ATOM   3782  N   ALA C 181      24.448   4.533  15.249  1.00 30.00           N
ATOM   3783  CA  ALA C 181      23.770   4.197  16.491  1.00 30.00           C
ATOM   3784  C   ALA C 181      22.928   5.383  16.946  1.00 30.00           C
ATOM   3785  O   ALA C 181      21.905   5.211  17.614  1.00 30.00           O
ATOM   3786  N   LEU C 182      23.373   6.586  16.579  1.00 30.00           N
ATOM   3787  CA  LEU C 182      22.690   7.829  16.937  1.00 30.00           C
ATOM   3788  C   LEU C 182      22.520   7.978  18.451  1.00 30.00           C
ATOM   3789  O   LEU C 182      21.536   8.539  18.946  1.00 30.00           O
ATOM   3790  N   TRP C 183      23.471   7.428  19.223  1.00110.00           N
ATOM   3791  CA  TRP C 183      23.562   7.471  20.680  1.00110.00           C
ATOM   3792  C   TRP C 183      22.211   7.110  21.340  1.00110.00           C
ATOM   3793  O   TRP C 183      21.902   7.569  22.440  1.00110.00           O
ATOM   3794  CB  TRP C 183      24.011   8.867  21.172  1.00110.00           C
ATOM   3795  CG  TRP C 183      25.309   9.324  20.564  1.00110.00           C
ATOM   3796  CD1 TRP C 183      26.579   8.965  20.972  1.00110.00           C
ATOM   3797  CD2 TRP C 183      25.467  10.201  19.442  1.00110.00           C
ATOM   3798  NE1 TRP C 183      27.490   9.568  20.144  1.00110.00           N
ATOM   3799  CE3 TRP C 183      24.569  10.897  18.606  1.00110.00           C
ATOM   3800  CE2 TRP C 183      26.835  10.321  19.194  1.00110.00           C
ATOM   3801  CZ3 TRP C 183      25.066  11.663  17.547  1.00110.00           C
ATOM   3802  CZ2 TRP C 183      27.350  11.092  18.145  1.00110.00           C
ATOM   3803  CH2 TRP C 183      26.437  11.758  17.322  1.00110.00           C
ATOM   3804  N   GLU C 184      21.408   6.295  20.644  1.00110.00           N
ATOM   3805  CA  GLU C 184      20.071   5.790  21.056  1.00110.00           C
ATOM   3806  C   GLU C 184      20.476   4.318  21.496  1.00110.00           C
ATOM   3807  O   GLU C 184      20.110   3.327  20.865  1.00110.00           O
ATOM   3808  N   CYS C 185      21.300   4.258  22.545  1.00110.00           N
ATOM   3809  CA  CYS C 185      21.874   3.035  23.095  1.00110.00           C
ATOM   3810  C   CYS C 185      22.890   2.416  22.115  1.00110.00           C
ATOM   3811  O   CYS C 185      23.877   3.058  21.758  1.00110.00           O
ATOM   3812  CB  CYS C 185      20.764   2.084  23.614  1.00110.00           C
ATOM   3813  SG  CYS C 185      19.715   2.826  24.926  1.00110.00           S
ATOM   3814  N   GLY C 186      22.648   1.164  21.708  1.00110.00           N
ATOM   3815  CA  GLY C 186      23.488   0.409  20.777  1.00110.00           C
ATOM   3816  C   GLY C 186      23.098   0.685  19.326  1.00110.00           C
ATOM   3817  O   GLY C 186      22.959   1.864  19.008  1.00110.00           O
ATOM   3818  N   CYS C 187      22.925  -0.344  18.460  1.00 30.00           N
ATOM   3819  CA  CYS C 187      22.418  -0.329  17.098  1.00 30.00           C
ATOM   3820  C   CYS C 187      23.471  -0.118  16.031  1.00 30.00           C
ATOM   3821  O   CYS C 187      23.230  -0.377  14.853  1.00 30.00           O
ATOM   3822  CB  CYS C 187      21.388   0.844  16.927  1.00 30.00           C
ATOM   3823  SG  CYS C 187      19.939   0.790  18.065  1.00110.00           S
ATOM   3824  N   ALA C 188      24.640   0.374  16.433  1.00 30.00           N
ATOM   3825  CA  ALA C 188      25.706   0.607  15.471  1.00 30.00           C
ATOM   3826  C   ALA C 188      26.109  -0.689  14.796  1.00 30.00           C
ATOM   3827  O   ALA C 188      26.267  -1.726  15.447  1.00 30.00           O
ATOM   3828  N   THR C 189      26.284  -0.611  13.483  1.00 30.00           N
ATOM   3829  CA  THR C 189      26.688  -1.755  12.689  1.00 30.00           C
ATOM   3830  C   THR C 189      27.871  -1.397  11.806  1.00 30.00           C
ATOM   3831  O   THR C 189      27.923  -0.313  11.224  1.00 30.00           O
ATOM   3832  N   LEU C 190      28.815  -2.319  11.713  1.00 30.00           N
ATOM   3833  CA  LEU C 190      29.981  -2.162  10.854  1.00 30.00           C
ATOM   3834  C   LEU C 190      30.237  -3.562  10.310  1.00 30.00           C
ATOM   3835  O   LEU C 190      30.349  -4.525  11.075  1.00 30.00           O
ATOM   3836  N   GLY C 191      30.291  -3.691   8.990  1.00 30.00           N
ATOM   3837  CA  GLY C 191      30.518  -5.004   8.416  1.00 30.00           C
ATOM   3838  C   GLY C 191      30.498  -5.037   6.901  1.00 30.00           C
ATOM   3839  O   GLY C 191      30.217  -4.035   6.243  1.00 30.00           O
ATOM   3840  N   ALA C 192      30.799  -6.204   6.351  1.00 30.00           N
ATOM   3841  CA  ALA C 192      30.819  -6.361   4.913  1.00 30.00           C
ATOM   3842  C   ALA C 192      31.175  -7.782   4.530  1.00 30.00           C
ATOM   3843  O   ALA C 192      31.322  -8.653   5.393  1.00 30.00           O
ATOM   3844  N   SER C 193      31.309  -8.024   3.230  1.00 30.00           N
ATOM   3845  CA  SER C 193      31.648  -9.354   2.759  1.00 30.00           C
ATOM   3846  C   SER C 193      32.443  -9.306   1.465  1.00 30.00           C
ATOM   3847  O   SER C 193      32.450  -8.305   0.755  1.00 30.00           O
ATOM   3848  N   PHE C 194      33.109 -10.414   1.180  1.00 30.00           N
ATOM   3849  CA  PHE C 194      33.895 -10.582  -0.035  1.00 30.00           C
ATOM   3850  C   PHE C 194      33.414 -11.910  -0.605  1.00 30.00           C
ATOM   3851  O   PHE C 194      33.295 -12.895   0.120  1.00 30.00           O
ATOM   3852  CB  PHE C 194      35.409 -10.669   0.244  1.00 30.00           C
ATOM   3853  CG  PHE C 194      35.888  -9.881   1.447  1.00110.00           C
ATOM   3854  CD1 PHE C 194      36.034  -8.490   1.385  1.00110.00           C
ATOM   3855  CD2 PHE C 194      36.145 -10.534   2.662  1.00110.00           C
ATOM   3856  CE1 PHE C 194      36.430  -7.766   2.511  1.00110.00           C
ATOM   3857  CE2 PHE C 194      36.539  -9.810   3.788  1.00110.00           C
ATOM   3858  CZ  PHE C 194      36.682  -8.425   3.712  1.00110.00           C
ATOM   3859  N   GLN C 195      33.117 -11.943  -1.895  1.00 30.00           N
ATOM   3860  CA  GLN C 195      32.633 -13.175  -2.487  1.00 30.00           C
ATOM   3861  C   GLN C 195      33.094 -13.382  -3.917  1.00 30.00           C
ATOM   3862  O   GLN C 195      33.617 -12.469  -4.559  1.00 30.00           O
ATOM   3863  N   TYR C 196      32.908 -14.609  -4.390  1.00 30.00           N
ATOM   3864  CA  TYR C 196      33.244 -14.981  -5.753  1.00 30.00           C
ATOM   3865  C   TYR C 196      32.002 -15.665  -6.308  1.00 30.00           C
ATOM   3866  O   TYR C 196      31.568 -16.700  -5.791  1.00 30.00           O
ATOM   3867  CB  TYR C 196      34.453 -15.930  -5.750  1.00 30.00           C
ATOM   3868  CG  TYR C 196      34.899 -16.432  -7.103  1.00 30.00           C
ATOM   3869  CD1 TYR C 196      35.855 -15.726  -7.841  1.00 30.00           C
ATOM   3870  CD2 TYR C 196      34.384 -17.630  -7.626  1.00 30.00           C
ATOM   3871  CE1 TYR C 196      36.304 -16.215  -9.069  1.00 30.00           C
ATOM   3872  CE2 TYR C 196      34.823 -18.113  -8.861  1.00 30.00           C
ATOM   3873  CZ  TYR C 196      35.781 -17.400  -9.574  1.00 30.00           C
ATOM   3874  OH  TYR C 196      36.235 -17.833 -10.786  1.00 30.00           O
ATOM   3875  N   ALA C 197      31.421 -15.070  -7.343  1.00 30.00           N
ATOM   3876  CA  ALA C 197      30.235 -15.629  -7.972  1.00 30.00           C
ATOM   3877  C   ALA C 197      30.451 -15.743  -9.475  1.00 30.00           C
ATOM   3878  O   ALA C 197      30.559 -14.735 -10.173  1.00 30.00           O
ATOM   3879  N   GLN C 198      30.511 -16.972  -9.968  1.00 30.00           N
ATOM   3880  CA  GLN C 198      30.713 -17.204 -11.393  1.00 30.00           C
ATOM   3881  C   GLN C 198      30.158 -18.565 -11.776  1.00 30.00           C
ATOM   3882  O   GLN C 198      30.510 -19.583 -11.176  1.00 30.00           O
ATOM   3883  N   SER C 199      29.283 -18.575 -12.774  1.00 30.00           N
ATOM   3884  CA  SER C 199      28.698 -19.818 -13.228  1.00 30.00           C
ATOM   3885  C   SER C 199      28.034 -20.611 -12.116  1.00 30.00           C
ATOM   3886  O   SER C 199      27.201 -20.072 -11.384  1.00 30.00           O
ATOM   3887  N   LYS C 200      28.388 -21.897 -11.961  1.00 30.00           N
ATOM   3888  CA  LYS C 200      27.813 -22.763 -10.927  1.00 30.00           C
ATOM   3889  C   LYS C 200      28.419 -22.604  -9.532  1.00 30.00           C
ATOM   3890  O   LYS C 200      27.948 -23.219  -8.577  1.00 30.00           O
ATOM   3891  CB  LYS C 200      28.046 -24.213 -11.410  1.00 30.00           C
ATOM   3892  CG  LYS C 200      27.266 -24.552 -12.692  1.00110.00           C
ATOM   3893  CD  LYS C 200      27.853 -25.781 -13.397  1.00110.00           C
ATOM   3894  CE  LYS C 200      26.961 -26.244 -14.542  1.00110.00           C
ATOM   3895  NZ  LYS C 200      27.584 -27.402 -15.213  1.00110.00           N1+
ATOM   3896  N   PRO C 201      29.458 -21.785  -9.415  1.00 30.00           N
ATOM   3897  CA  PRO C 201      30.126 -21.591  -8.136  1.00 30.00           C
ATOM   3898  C   PRO C 201      29.825 -20.261  -7.453  1.00 30.00           C
ATOM   3899  O   PRO C 201      29.746 -19.211  -8.093  1.00 30.00           O
ATOM   3900  N   LYS C 202      29.671 -20.319  -6.136  1.00 30.00           N
ATOM   3901  CA  LYS C 202      29.402 -19.131  -5.336  1.00 30.00           C
ATOM   3902  C   LYS C 202      29.977 -19.362  -3.953  1.00 30.00           C
ATOM   3903  O   LYS C 202      29.683 -20.365  -3.311  1.00 30.00           O
ATOM   3904  CB  LYS C 202      27.889 -18.837  -5.241  1.00 30.00           C
ATOM   3905  CG  LYS C 202      27.563 -17.484  -4.577  1.00110.00           C
ATOM   3906  CD  LYS C 202      27.217 -17.592  -3.082  1.00110.00           C
ATOM   3907  CE  LYS C 202      27.133 -16.213  -2.429  1.00110.00           C
ATOM   3908  NZ  LYS C 202      26.735 -16.343  -1.014  1.00110.00           N1+
ATOM   3909  N   VAL C 203      30.813 -18.436  -3.502  1.00 30.00           N
ATOM   3910  CA  VAL C 203      31.433 -18.542  -2.186  1.00 30.00           C
ATOM   3911  C   VAL C 203      31.529 -17.151  -1.578  1.00 30.00           C
ATOM   3912  O   VAL C 203      31.854 -16.191  -2.273  1.00 30.00           O
ATOM   3913  N   GLU C 204      31.247 -17.050  -0.282  1.00 30.00           N
ATOM   3914  CA  GLU C 204      31.294 -15.760   0.401  1.00 30.00           C
ATOM   3915  C   GLU C 204      31.811 -15.843   1.830  1.00 30.00           C
ATOM   3916  O   GLU C 204      31.660 -16.858   2.513  1.00 30.00           O
ATOM   3917  N   GLU C 205      32.423 -14.749   2.266  1.00 30.00           N
ATOM   3918  CA  GLU C 205      32.929 -14.622   3.621  1.00 30.00           C
ATOM   3919  C   GLU C 205      32.430 -13.278   4.145  1.00 30.00           C
ATOM   3920  O   GLU C 205      32.710 -12.231   3.552  1.00 30.00           O
ATOM   3921  N   LEU C 206      31.668 -13.314   5.235  1.00 30.00           N
ATOM   3922  CA  LEU C 206      31.161 -12.087   5.815  1.00 30.00           C
ATOM   3923  C   LEU C 206      31.613 -11.882   7.251  1.00 30.00           C
ATOM   3924  O   LEU C 206      31.710 -12.835   8.025  1.00 30.00           O
ATOM   3925  N   ASN C 207      31.906 -10.634   7.599  1.00 30.00           N
ATOM   3926  CA  ASN C 207      32.333 -10.275   8.949  1.00 30.00           C
ATOM   3927  C   ASN C 207      31.542  -9.045   9.368  1.00 30.00           C
ATOM   3928  O   ASN C 207      31.400  -8.093   8.594  1.00 30.00           O
ATOM   3929  N   VAL C 208      31.042  -9.052  10.594  1.00 30.00           N
ATOM   3930  CA  VAL C 208      30.270  -7.919  11.068  1.00 30.00           C
ATOM   3931  C   VAL C 208      30.295  -7.789  12.579  1.00 30.00           C
ATOM   3932  O   VAL C 208      30.470  -8.777  13.308  1.00 30.00           O
ATOM   3933  N   LEU C 209      30.134  -6.556  13.042  1.00 30.00           N
ATOM   3934  CA  LEU C 209      30.072  -6.284  14.469  1.00 30.00           C
ATOM   3935  C   LEU C 209      28.992  -5.244  14.736  1.00 30.00           C
ATOM   3936  O   LEU C 209      28.910  -4.217  14.049  1.00 30.00           O
ATOM   3937  N   CYS C 210      28.157  -5.525  15.726  1.00 30.00           N
ATOM   3938  CA  CYS C 210      27.113  -4.599  16.134  1.00 30.00           C
ATOM   3939  C   CYS C 210      27.352  -4.265  17.597  1.00 30.00           C
ATOM   3940  O   CYS C 210      27.897  -5.081  18.354  1.00 30.00           O
ATOM   3941  CB  CYS C 210      25.776  -5.267  16.018  1.00 30.00           C
ATOM   3942  SG  CYS C 210      25.029  -6.015  17.492  1.00110.00           S
ATOM   3943  N   ASN C 211      26.958  -3.058  17.983  1.00 30.00           N
ATOM   3944  CA  ASN C 211      27.068  -2.621  19.360  1.00 30.00           C
ATOM   3945  C   ASN C 211      25.693  -2.863  19.964  1.00 30.00           C
ATOM   3946  O   ASN C 211      24.674  -2.545  19.351  1.00 30.00           O
ATOM   3947  N   ALA C 212      25.655  -3.450  21.150  1.00 30.00           N
ATOM   3948  CA  ALA C 212      24.382  -3.697  21.794  1.00 30.00           C
ATOM   3949  C   ALA C 212      24.532  -3.718  23.313  1.00 30.00           C
ATOM   3950  O   ALA C 212      25.507  -3.195  23.864  1.00 30.00           O
ATOM   3951  N   SER C 213      23.536  -4.253  24.031  1.00110.00           N
ATOM   3952  CA  SER C 213      23.488  -4.451  25.492  1.00110.00           C
ATOM   3953  C   SER C 213      23.558  -3.118  26.279  1.00110.00           C
ATOM   3954  O   SER C 213      23.666  -3.132  27.510  1.00110.00           O
ATOM   3955  N   GLU C 214      23.470  -2.020  25.500  1.00110.00           N
ATOM   3956  CA  GLU C 214      23.296  -0.617  25.758  1.00110.00           C
ATOM   3957  C   GLU C 214      24.549   0.066  25.190  1.00110.00           C
ATOM   3958  O   GLU C 214      24.916   1.182  25.629  1.00110.00           O
ATOM   3959  N   PHE C 215      25.290  -0.622  24.305  1.00110.00           N
ATOM   3960  CA  PHE C 215      26.692  -0.455  23.939  1.00110.00           C
ATOM   3961  C   PHE C 215      27.611  -1.135  24.979  1.00110.00           C
ATOM   3962  O   PHE C 215      28.808  -0.859  25.023  1.00110.00           O
ATOM   3963  CB  PHE C 215      27.069   1.038  23.729  1.00110.00           C
ATOM   3964  CG  PHE C 215      27.964   1.381  22.553  1.00110.00           C
ATOM   3965  CD1 PHE C 215      29.346   1.160  22.585  1.00110.00           C
ATOM   3966  CD2 PHE C 215      27.419   2.023  21.427  1.00110.00           C
ATOM   3967  CE1 PHE C 215      30.161   1.572  21.525  1.00110.00           C
ATOM   3968  CE2 PHE C 215      28.229   2.430  20.367  1.00110.00           C
ATOM   3969  CZ  PHE C 215      29.603   2.205  20.417  1.00110.00           C
ATOM   3970  N   ASP C 248      27.058  -2.042  25.790  1.00110.00           N
ATOM   3971  CA  ASP C 248      27.761  -2.780  26.836  1.00110.00           C
ATOM   3972  C   ASP C 248      28.263  -4.137  26.320  1.00110.00           C
ATOM   3973  O   ASP C 248      29.046  -4.802  27.000  1.00110.00           O
ATOM   3974  N   TYR C 249      27.828  -4.586  25.124  1.00 30.00           N
ATOM   3975  CA  TYR C 249      28.240  -5.845  24.530  1.00 30.00           C
ATOM   3976  C   TYR C 249      28.474  -5.717  23.028  1.00 30.00           C
ATOM   3977  O   TYR C 249      27.774  -4.966  22.341  1.00 30.00           O
ATOM   3978  CB  TYR C 249      27.232  -6.980  24.807  1.00 30.00           C
ATOM   3979  CG  TYR C 249      27.821  -8.374  24.720  1.00110.00           C
ATOM   3980  CD1 TYR C 249      28.783  -8.797  25.652  1.00110.00           C
ATOM   3981  CD2 TYR C 249      27.415  -9.258  23.713  1.00110.00           C
ATOM   3982  CE1 TYR C 249      29.356 -10.064  25.554  1.00110.00           C
ATOM   3983  CE2 TYR C 249      27.987 -10.528  23.616  1.00110.00           C
ATOM   3984  CZ  TYR C 249      28.961 -10.917  24.530  1.00110.00           C
ATOM   3985  OH  TYR C 249      29.567 -12.138  24.450  1.00110.00           O
ATOM   3986  N   HIS C 250      29.471  -6.445  22.530  1.00 30.00           N
ATOM   3987  CA  HIS C 250      29.772  -6.461  21.103  1.00 30.00           C
ATOM   3988  C   HIS C 250      29.195  -7.750  20.534  1.00 30.00           C
ATOM   3989  O   HIS C 250      29.377  -8.823  21.112  1.00 30.00           O
ATOM   3990  CB  HIS C 250      31.290  -6.440  20.840  1.00 30.00           C
ATOM   3991  CG  HIS C 250      31.858  -5.064  20.989  1.00110.00           C
ATOM   3992  ND1 HIS C 250      32.174  -4.505  22.204  1.00110.00           N
ATOM   3993  CD2 HIS C 250      32.163  -4.092  20.060  1.00110.00           C
ATOM   3994  CE1 HIS C 250      32.631  -3.238  21.961  1.00110.00           C
ATOM   3995  NE2 HIS C 250      32.634  -2.958  20.675  1.00110.00           N
ATOM   3996  N   GLU C 251      28.481  -7.644  19.419  1.00 30.00           N
ATOM   3997  CA  GLU C 251      27.935  -8.825  18.764  1.00 30.00           C
ATOM   3998  C   GLU C 251      28.841  -9.037  17.550  1.00 30.00           C
ATOM   3999  O   GLU C 251      28.739  -8.310  16.560  1.00 30.00           O
ATOM   4000  N   TRP C 252      29.752 -10.003  17.652  1.00 30.00           N
ATOM   4001  CA  TRP C 252      30.677 -10.312  16.565  1.00 30.00           C
ATOM   4002  C   TRP C 252      30.154 -11.512  15.793  1.00 30.00           C
ATOM   4003  O   TRP C 252      29.765 -12.520  16.386  1.00 30.00           O
ATOM   4004  CB  TRP C 252      32.069 -10.632  17.137  1.00 30.00           C
ATOM   4005  CG  TRP C 252      33.116 -10.886  16.092  1.00110.00           C
ATOM   4006  CD1 TRP C 252      33.754  -9.935  15.320  1.00110.00           C
ATOM   4007  CD2 TRP C 252      33.649 -12.159  15.706  1.00110.00           C
ATOM   4008  NE1 TRP C 252      34.646 -10.569  14.494  1.00110.00           N
ATOM   4009  CE3 TRP C 252      33.403 -13.490  16.106  1.00110.00           C
ATOM   4010  CE2 TRP C 252      34.616 -11.926  14.727  1.00110.00           C
ATOM   4011  CZ3 TRP C 252      34.138 -14.532  15.528  1.00110.00           C
ATOM   4012  CZ2 TRP C 252      35.369 -12.956  14.148  1.00110.00           C
ATOM   4013  CH2 TRP C 252      35.112 -14.264  14.569  1.00110.00           C
ATOM   4014  N   GLN C 253      30.155 -11.399  14.472  1.00 30.00           N
ATOM   4015  CA  GLN C 253      29.645 -12.469  13.628  1.00 30.00           C
ATOM   4016  C   GLN C 253      30.496 -12.709  12.389  1.00 30.00           C
ATOM   4017  O   GLN C 253      30.761 -11.790  11.619  1.00 30.00           O
ATOM   4018  N   ALA C 254      30.941 -13.950  12.221  1.00 30.00           N
ATOM   4019  CA  ALA C 254      31.727 -14.335  11.055  1.00 30.00           C
ATOM   4020  C   ALA C 254      30.924 -15.433  10.362  1.00 30.00           C
ATOM   4021  O   ALA C 254      30.452 -16.370  11.006  1.00 30.00           O
ATOM   4022  N   SER C 255      30.758 -15.312   9.050  1.00 30.00           N
ATOM   4023  CA  SER C 255      29.967 -16.279   8.297  1.00 30.00           C
ATOM   4024  C   SER C 255      30.626 -16.681   6.975  1.00 30.00           C
ATOM   4025  O   SER C 255      31.018 -15.827   6.174  1.00 30.00           O
ATOM   4026  N   LEU C 256      30.746 -17.983   6.749  1.00 30.00           N
ATOM   4027  CA  LEU C 256      31.328 -18.474   5.511  1.00 30.00           C
ATOM   4028  C   LEU C 256      30.270 -19.303   4.781  1.00 30.00           C
ATOM   4029  O   LEU C 256      29.636 -20.181   5.367  1.00 30.00           O
ATOM   4030  N   ALA C 257      30.074 -19.010   3.499  1.00 30.00           N
ATOM   4031  CA  ALA C 257      29.085 -19.740   2.733  1.00 30.00           C
ATOM   4032  C   ALA C 257      29.567 -20.091   1.342  1.00 30.00           C
ATOM   4033  O   ALA C 257      30.438 -19.425   0.779  1.00 30.00           O
ATOM   4034  N   LEU C 258      28.992 -21.148   0.785  1.00 30.00           N
ATOM   4035  CA  LEU C 258      29.342 -21.599  -0.552  1.00 30.00           C
ATOM   4036  C   LEU C 258      28.279 -22.551  -1.071  1.00 30.00           C
ATOM   4037  O   LEU C 258      27.576 -23.206  -0.295  1.00 30.00           O
ATOM   4038  N   SER C 259      28.156 -22.611  -2.392  1.00 30.00           N
ATOM   4039  CA  SER C 259      27.199 -23.497  -3.024  1.00 30.00           C
ATOM   4040  C   SER C 259      27.716 -23.852  -4.409  1.00 30.00           C
ATOM   4041  O   SER C 259      28.471 -23.083  -5.023  1.00 30.00           O
ATOM   4042  N   TYR C 260      27.324 -25.028  -4.891  1.00 30.00           N
ATOM   4043  CA  TYR C 260      27.735 -25.480  -6.212  1.00 30.00           C
ATOM   4044  C   TYR C 260      26.531 -26.109  -6.902  1.00 30.00           C
ATOM   4045  O   TYR C 260      25.880 -26.995  -6.346  1.00 30.00           O
ATOM   4046  CB  TYR C 260      28.888 -26.507  -6.130  1.00 30.00           C
ATOM   4047  CG  TYR C 260      29.864 -26.392  -7.286  1.00 30.00           C
ATOM   4048  CD1 TYR C 260      29.528 -26.863  -8.563  1.00 30.00           C
ATOM   4049  CD2 TYR C 260      31.118 -25.795  -7.093  1.00 30.00           C
ATOM   4050  CE1 TYR C 260      30.422 -26.732  -9.627  1.00 30.00           C
ATOM   4051  CE2 TYR C 260      32.018 -25.674  -8.155  1.00 30.00           C
ATOM   4052  CZ  TYR C 260      31.659 -26.137  -9.416  1.00 30.00           C
ATOM   4053  OH  TYR C 260      32.502 -26.020 -10.483  1.00 30.00           O
ATOM   4054  N   ARG C 261      26.236 -25.641  -8.108  1.00 30.00           N
ATOM   4055  CA  ARG C 261      25.115 -26.159  -8.872  1.00 30.00           C
ATOM   4056  C   ARG C 261      25.628 -27.203  -9.869  1.00 30.00           C
ATOM   4057  O   ARG C 261      26.282 -26.851 -10.853  1.00 30.00           O
ATOM   4058  CB  ARG C 261      24.420 -24.991  -9.603  1.00 30.00           C
ATOM   4059  CG  ARG C 261      23.939 -23.905  -8.629  1.00110.00           C
ATOM   4060  CD  ARG C 261      23.150 -22.807  -9.330  1.00110.00           C
ATOM   4061  NE  ARG C 261      22.636 -21.823  -8.365  1.00110.00           N
ATOM   4062  CZ  ARG C 261      23.345 -20.860  -7.752  1.00110.00           C
ATOM   4063  NH1 ARG C 261      24.643 -20.671  -7.999  1.00110.00           N
ATOM   4064  NH2 ARG C 261      22.741 -20.062  -6.867  1.00110.00           N1+
ATOM   4065  N   LEU C 262      25.347 -28.479  -9.607  1.00 30.00           N
ATOM   4066  CA  LEU C 262      25.775 -29.556 -10.504  1.00 30.00           C
ATOM   4067  C   LEU C 262      24.711 -29.846 -11.561  1.00 30.00           C
ATOM   4068  O   LEU C 262      24.784 -30.860 -12.256  1.00 30.00           O
ATOM   4069  N   ASN C 263      23.713 -28.974 -11.665  1.00 30.00           N
ATOM   4070  CA  ASN C 263      22.664 -29.186 -12.648  1.00 30.00           C
ATOM   4071  C   ASN C 263      21.590 -30.148 -12.177  1.00 30.00           C
ATOM   4072  O   ASN C 263      20.431 -29.765 -12.017  1.00 30.00           O
ATOM   4073  N   MET C 264      21.967 -31.406 -11.966  1.00 30.00           N
ATOM   4074  CA  MET C 264      21.021 -32.421 -11.506  1.00 30.00           C
ATOM   4075  C   MET C 264      20.654 -32.169 -10.044  1.00 30.00           C
ATOM   4076  O   MET C 264      19.615 -32.617  -9.557  1.00 30.00           O
ATOM   4077  N   PHE C 265      21.526 -31.446  -9.351  1.00 30.00           N
ATOM   4078  CA  PHE C 265      21.314 -31.112  -7.953  1.00 30.00           C
ATOM   4079  C   PHE C 265      22.219 -29.939  -7.599  1.00 30.00           C
ATOM   4080  O   PHE C 265      23.178 -29.636  -8.320  1.00 30.00           O
ATOM   4081  CB  PHE C 265      21.767 -32.238  -6.980  1.00 30.00           C
ATOM   4082  CG  PHE C 265      21.176 -33.619  -7.135  1.00110.00           C
ATOM   4083  CD1 PHE C 265      19.899 -33.910  -6.641  1.00110.00           C
ATOM   4084  CD2 PHE C 265      21.915 -34.643  -7.745  1.00110.00           C
ATOM   4085  CE1 PHE C 265      19.366 -35.195  -6.760  1.00110.00           C
ATOM   4086  CE2 PHE C 265      21.384 -35.930  -7.857  1.00110.00           C
ATOM   4087  CZ  PHE C 265      20.109 -36.205  -7.367  1.00110.00           C
ATOM   4088  N   THR C 266      21.901 -29.276  -6.491  1.00 30.00           N
ATOM   4089  CA  THR C 266      22.688 -28.147  -6.025  1.00 30.00           C
ATOM   4090  C   THR C 266      23.084 -28.392  -4.570  1.00 30.00           C
ATOM   4091  O   THR C 266      22.276 -28.853  -3.766  1.00 30.00           O
ATOM   4092  N   PRO C 267      24.333 -28.088  -4.244  1.00 30.00           N
ATOM   4093  CA  PRO C 267      24.835 -28.284  -2.893  1.00 30.00           C
ATOM   4094  C   PRO C 267      25.079 -26.908  -2.281  1.00 30.00           C
ATOM   4095  O   PRO C 267      25.634 -26.022  -2.931  1.00 30.00           O
ATOM   4096  N   TYR C 268      24.659 -26.725  -1.036  1.00 30.00           N
ATOM   4097  CA  TYR C 268      24.850 -25.439  -0.380  1.00 30.00           C
ATOM   4098  C   TYR C 268      25.144 -25.610   1.102  1.00 30.00           C
ATOM   4099  O   TYR C 268      24.613 -26.510   1.752  1.00 30.00           O
ATOM   4100  CB  TYR C 268      23.620 -24.486  -0.377  1.00 30.00           C
ATOM   4101  CG  TYR C 268      22.746 -24.270  -1.589  1.00110.00           C
ATOM   4102  CD1 TYR C 268      21.912 -25.291  -2.053  1.00110.00           C
ATOM   4103  CD2 TYR C 268      22.601 -22.987  -2.142  1.00110.00           C
ATOM   4104  CE1 TYR C 268      20.939 -25.027  -3.017  1.00110.00           C
ATOM   4105  CE2 TYR C 268      21.671 -22.737  -3.153  1.00110.00           C
ATOM   4106  CZ  TYR C 268      20.841 -23.761  -3.582  1.00110.00           C
ATOM   4107  OH  TYR C 268      19.924 -23.488  -4.554  1.00110.00           O
ATOM   4108  N   ILE C 269      25.996 -24.741   1.633  1.00 30.00           N
ATOM   4109  CA  ILE C 269      26.334 -24.822   3.039  1.00 30.00           C
ATOM   4110  C   ILE C 269      26.620 -23.475   3.670  1.00 30.00           C
ATOM   4111  O   ILE C 269      26.915 -22.499   2.981  1.00 30.00           O
ATOM   4112  N   GLY C 270      26.528 -23.431   4.993  1.00 30.00           N
ATOM   4113  CA  GLY C 270      26.786 -22.224   5.761  1.00 30.00           C
ATOM   4114  C   GLY C 270      27.523 -22.567   7.049  1.00 30.00           C
ATOM   4115  O   GLY C 270      27.204 -23.548   7.718  1.00 30.00           O
ATOM   4116  N   VAL C 271      28.517 -21.746   7.374  1.00 30.00           N
ATOM   4117  CA  VAL C 271      29.319 -21.882   8.585  1.00 30.00           C
ATOM   4118  C   VAL C 271      29.264 -20.525   9.263  1.00 30.00           C
ATOM   4119  O   VAL C 271      29.590 -19.508   8.651  1.00 30.00           O
ATOM   4120  N   LYS C 272      28.853 -20.497  10.522  1.00 30.00           N
ATOM   4121  CA  LYS C 272      28.765 -19.227  11.215  1.00 30.00           C
ATOM   4122  C   LYS C 272      29.078 -19.303  12.701  1.00 30.00           C
ATOM   4123  O   LYS C 272      28.774 -20.283  13.379  1.00 30.00           O
ATOM   4124  CB  LYS C 272      27.432 -18.484  10.960  1.00 30.00           C
ATOM   4125  CG  LYS C 272      27.416 -16.974  11.241  1.00110.00           C
ATOM   4126  CD  LYS C 272      26.054 -16.371  10.887  1.00110.00           C
ATOM   4127  CE  LYS C 272      26.078 -14.854  10.850  1.00110.00           C
ATOM   4128  NZ  LYS C 272      24.789 -14.351  10.339  1.00110.00           N1+
ATOM   4129  N   TRP C 273      29.709 -18.250  13.192  1.00 30.00           N
ATOM   4130  CA  TRP C 273      30.036 -18.153  14.594  1.00 30.00           C
ATOM   4131  C   TRP C 273      29.571 -16.781  15.067  1.00 30.00           C
ATOM   4132  O   TRP C 273      30.021 -15.755  14.564  1.00 30.00           O
ATOM   4133  CB  TRP C 273      31.561 -18.212  14.829  1.00 30.00           C
ATOM   4134  CG  TRP C 273      32.233 -19.475  14.371  1.00110.00           C
ATOM   4135  CD1 TRP C 273      32.479 -20.597  15.136  1.00110.00           C
ATOM   4136  CD2 TRP C 273      32.806 -19.725  13.080  1.00110.00           C
ATOM   4137  NE1 TRP C 273      33.158 -21.511  14.372  1.00110.00           N
ATOM   4138  CE3 TRP C 273      32.904 -18.979  11.886  1.00110.00           C
ATOM   4139  CE2 TRP C 273      33.389 -20.992  13.117  1.00110.00           C
ATOM   4140  CZ3 TRP C 273      33.581 -19.515  10.785  1.00110.00           C
ATOM   4141  CZ2 TRP C 273      34.076 -21.542  12.027  1.00110.00           C
ATOM   4142  CH2 TRP C 273      34.165 -20.776  10.861  1.00110.00           C
ATOM   4143  N   SER C 274      28.688 -16.864  16.060  1.00110.00           N
ATOM   4144  CA  SER C 274      28.216 -15.888  17.035  1.00110.00           C
ATOM   4145  C   SER C 274      27.444 -16.681  18.098  1.00110.00           C
ATOM   4146  O   SER C 274      26.615 -17.516  17.729  1.00110.00           O
ATOM   4147  N   ARG C 275      27.762 -16.453  19.381  1.00110.00           N
ATOM   4148  CA  ARG C 275      27.296 -17.303  20.539  1.00110.00           C
ATOM   4149  C   ARG C 275      28.369 -18.519  20.410  1.00110.00           C
ATOM   4150  O   ARG C 275      29.558 -18.213  20.446  1.00110.00           O
ATOM   4151  CB  ARG C 275      25.829 -17.659  20.567  1.00110.00           C
ATOM   4152  CG  ARG C 275      25.329 -18.343  21.850  1.00110.00           C
ATOM   4153  CD  ARG C 275      25.269 -17.444  23.075  1.00110.00           C
ATOM   4154  NE  ARG C 275      24.509 -18.071  24.167  1.00110.00           N
ATOM   4155  CZ  ARG C 275      24.949 -19.036  24.991  1.00110.00           C
ATOM   4156  NH1 ARG C 275      26.178 -19.546  24.892  1.00110.00           N
ATOM   4157  NH2 ARG C 275      24.137 -19.508  25.941  1.00110.00           N1+
ATOM   4158  N   ALA C 320      27.955 -19.780  20.227  1.00110.00           N
ATOM   4159  CA  ALA C 320      28.874 -20.891  19.971  1.00110.00           C
ATOM   4160  C   ALA C 320      29.172 -20.972  18.459  1.00110.00           C
ATOM   4161  O   ALA C 320      30.219 -20.498  18.019  1.00110.00           O
ATOM   4162  N   ASP C 321      28.254 -21.553  17.675  1.00110.00           N
ATOM   4163  CA  ASP C 321      28.378 -21.767  16.230  1.00110.00           C
ATOM   4164  C   ASP C 321      27.027 -22.227  15.628  1.00110.00           C
ATOM   4165  O   ASP C 321      26.144 -22.657  16.365  1.00110.00           O
ATOM   4166  N   THR C 322      26.902 -22.207  14.300  1.00 30.00           N
ATOM   4167  CA  THR C 322      25.841 -22.804  13.510  1.00 30.00           C
ATOM   4168  C   THR C 322      26.412 -23.402  12.233  1.00 30.00           C
ATOM   4169  O   THR C 322      27.230 -22.776  11.559  1.00 30.00           O
ATOM   4170  N   MET C 323      26.040 -24.680  11.955  1.00 30.00           N
ATOM   4171  CA  MET C 323      26.484 -25.451  10.796  1.00 30.00           C
ATOM   4172  C   MET C 323      25.223 -25.659   9.947  1.00 30.00           C
ATOM   4173  O   MET C 323      24.123 -25.879  10.472  1.00 30.00           O
ATOM   4174  N   GLN C 324      25.368 -25.640   8.616  1.00110.00           N
ATOM   4175  CA  GLN C 324      24.302 -25.964   7.679  1.00110.00           C
ATOM   4176  C   GLN C 324      24.817 -26.923   6.594  1.00110.00           C
ATOM   4177  O   GLN C 324      25.871 -26.673   6.009  1.00110.00           O
ATOM   4178  N   ILE C 325      24.065 -28.000   6.341  1.00110.00           N
ATOM   4179  CA  ILE C 325      24.372 -29.037   5.348  1.00110.00           C
ATOM   4180  C   ILE C 325      23.139 -29.222   4.442  1.00110.00           C
ATOM   4181  O   ILE C 325      22.200 -29.918   4.829  1.00110.00           O
ATOM   4182  N   VAL C 326      23.161 -28.601   3.260  1.00110.00           N
ATOM   4183  CA  VAL C 326      22.049 -28.706   2.342  1.00110.00           C
ATOM   4184  C   VAL C 326      22.057 -29.751   1.190  1.00110.00           C
ATOM   4185  O   VAL C 326      23.107 -30.030   0.609  1.00110.00           O
ATOM   4186  N   SER C 327      20.867 -30.198   0.790  1.00110.00           N
ATOM   4187  CA  SER C 327      20.587 -30.970  -0.410  1.00110.00           C
ATOM   4188  C   SER C 327      19.291 -30.467  -1.080  1.00110.00           C
ATOM   4189  O   SER C 327      18.733 -29.448  -0.674  1.00110.00           O
ATOM   4190  N   LEU C 328      18.835 -31.157  -2.129  1.00110.00           N
ATOM   4191  CA  LEU C 328      17.614 -30.816  -2.852  1.00110.00           C
ATOM   4192  C   LEU C 328      16.433 -30.963  -1.904  1.00110.00           C
ATOM   4193  O   LEU C 328      16.054 -32.085  -1.563  1.00110.00           O
ATOM   4194  N   GLN C 329      15.912 -29.803  -1.501  1.00110.00           N
ATOM   4195  CA  GLN C 329      14.793 -29.631  -0.592  1.00110.00           C
ATOM   4196  C   GLN C 329      15.020 -30.399   0.711  1.00110.00           C
ATOM   4197  O   GLN C 329      14.076 -30.846   1.365  1.00110.00           O
ATOM   4198  N   LEU C 330      16.287 -30.602   1.067  1.00 30.00           N
ATOM   4199  CA  LEU C 330      16.764 -31.350   2.222  1.00 30.00           C
ATOM   4200  C   LEU C 330      17.738 -30.373   2.886  1.00 30.00           C
ATOM   4201  O   LEU C 330      18.513 -29.770   2.145  1.00 30.00           O
ATOM   4202  N   ASN C 331      17.687 -30.215   4.198  1.00 30.00           N
ATOM   4203  CA  ASN C 331      18.596 -29.296   4.853  1.00 30.00           C
ATOM   4204  C   ASN C 331      18.895 -29.809   6.257  1.00 30.00           C
ATOM   4205  O   ASN C 331      18.165 -30.620   6.826  1.00 30.00           O
ATOM   4206  N   LYS C 332      19.950 -29.224   6.802  1.00 30.00           N
ATOM   4207  CA  LYS C 332      20.361 -29.530   8.146  1.00 30.00           C
ATOM   4208  C   LYS C 332      20.830 -28.213   8.750  1.00 30.00           C
ATOM   4209  O   LYS C 332      21.569 -27.494   8.093  1.00 30.00           O
ATOM   4210  CB  LYS C 332      21.470 -30.583   8.203  1.00 30.00           C
ATOM   4211  CG  LYS C 332      21.597 -31.211   9.598  1.00110.00           C
ATOM   4212  CD  LYS C 332      22.721 -32.249   9.641  1.00110.00           C
ATOM   4213  CE  LYS C 332      22.816 -32.912  11.009  1.00110.00           C
ATOM   4214  NZ  LYS C 332      23.917 -33.896  11.000  1.00110.00           N1+
ATOM   4215  N   MET C 333      20.380 -27.912   9.958  1.00 30.00           N
ATOM   4216  CA  MET C 333      20.749 -26.708  10.649  1.00 30.00           C
ATOM   4217  C   MET C 333      21.045 -26.992  12.121  1.00 30.00           C
ATOM   4218  O   MET C 333      20.320 -27.732  12.779  1.00 30.00           O
ATOM   4219  N   LYS C 334      22.177 -26.520  12.611  1.00110.00           N
ATOM   4220  CA  LYS C 334      22.566 -26.727  13.979  1.00110.00           C
ATOM   4221  C   LYS C 334      22.999 -25.392  14.533  1.00110.00           C
ATOM   4222  O   LYS C 334      24.143 -25.251  14.978  1.00110.00           O
ATOM   4223  CB  LYS C 334      23.685 -27.783  14.041  1.00110.00           C
ATOM   4224  CG  LYS C 334      23.970 -28.261  15.473  1.00110.00           C
ATOM   4225  CD  LYS C 334      25.380 -28.829  15.672  1.00110.00           C
ATOM   4226  CE  LYS C 334      26.539 -27.873  15.393  1.00110.00           C
ATOM   4227  NZ  LYS C 334      26.371 -26.600  16.109  1.00110.00           N1+
ATOM   4228  N   SER C 335      22.079 -24.427  14.441  1.00110.00           N
ATOM   4229  CA  SER C 335      22.338 -23.109  14.829  1.00110.00           C
ATOM   4230  C   SER C 335      22.304 -23.018  16.301  1.00110.00           C
ATOM   4231  O   SER C 335      22.401 -23.973  17.107  1.00110.00           O
ATOM   4232  N   ARG C 336      22.229 -21.746  16.694  1.00110.00           N
ATOM   4233  CA  ARG C 336      22.183 -21.412  18.093  1.00110.00           C
ATOM   4234  C   ARG C 336      20.811 -21.729  18.648  1.00110.00           C
ATOM   4235  O   ARG C 336      19.802 -21.177  18.205  1.00110.00           O
ATOM   4236  CB  ARG C 336      22.559 -19.980  18.322  1.00110.00           C
ATOM   4237  CG  ARG C 336      24.005 -19.842  18.761  1.00110.00           C
ATOM   4238  CD  ARG C 336      25.048 -20.739  18.153  1.00110.00           C
ATOM   4239  NE  ARG C 336      25.095 -22.155  18.601  1.00110.00           N
ATOM   4240  CZ  ARG C 336      24.896 -22.786  19.766  1.00110.00           C
ATOM   4241  NH1 ARG C 336      24.768 -22.143  20.919  1.00110.00           N
ATOM   4242  NH2 ARG C 336      24.821 -24.116  19.775  1.00110.00           N1+
ATOM   4243  N   LYS C 337      20.839 -22.683  19.581  1.00110.00           N
ATOM   4244  CA  LYS C 337      19.683 -23.243  20.244  1.00110.00           C
ATOM   4245  C   LYS C 337      18.832 -23.986  19.222  1.00110.00           C
ATOM   4246  O   LYS C 337      17.624 -24.320  19.531  1.00110.00           O
ATOM   4247  CB  LYS C 337      18.883 -22.185  21.028  1.00110.00           C
ATOM   4248  CG  LYS C 337      19.746 -21.471  22.080  1.00110.00           C
ATOM   4249  CD  LYS C 337      18.997 -20.389  22.867  1.00110.00           C
ATOM   4250  CE  LYS C 337      18.626 -19.178  22.019  1.00110.00           C
ATOM   4251  NZ  LYS C 337      18.098 -18.110  22.891  1.00110.00           N1+
ATOM   4252  N   SER C 338      19.394 -24.274  18.031  1.00 30.00           N
ATOM   4253  CA  SER C 338      18.693 -24.762  16.839  1.00 30.00           C
ATOM   4254  C   SER C 338      19.290 -26.100  16.420  1.00 30.00           C
ATOM   4255  O   SER C 338      20.521 -26.226  16.411  1.00 30.00           O
ATOM   4256  N   CYS C 339      18.460 -27.058  16.027  1.00 30.00           N
ATOM   4257  CA  CYS C 339      19.032 -28.356  15.637  1.00 30.00           C
ATOM   4258  C   CYS C 339      17.957 -29.231  15.013  1.00 30.00           C
ATOM   4259  O   CYS C 339      17.128 -29.858  15.681  1.00 30.00           O
ATOM   4260  CB  CYS C 339      19.598 -29.109  16.874  1.00 30.00           C
ATOM   4261  SG  CYS C 339      20.525 -30.637  16.457  1.00110.00           S
ATOM   4262  N   GLY C 340      17.970 -29.256  13.680  1.00 30.00           N
ATOM   4263  CA  GLY C 340      16.983 -30.030  12.955  1.00 30.00           C
ATOM   4264  C   GLY C 340      17.461 -30.485  11.586  1.00 30.00           C
ATOM   4265  O   GLY C 340      18.461 -30.075  11.006  1.00 30.00           O
ATOM   4266  N   ILE C 341      16.598 -31.319  11.026  1.00 30.00           N
ATOM   4267  CA  ILE C 341      16.731 -31.849   9.692  1.00 30.00           C
ATOM   4268  C   ILE C 341      15.480 -31.312   8.998  1.00 30.00           C
ATOM   4269  O   ILE C 341      14.488 -31.157   9.722  1.00 30.00           O
ATOM   4270  N   ALA C 342      15.618 -30.923   7.745  1.00 30.00           N
ATOM   4271  CA  ALA C 342      14.435 -30.406   7.056  1.00 30.00           C
ATOM   4272  C   ALA C 342      14.251 -31.248   5.805  1.00 30.00           C
ATOM   4273  O   ALA C 342      15.209 -31.683   5.176  1.00 30.00           O
ATOM   4274  N   VAL C 343      12.998 -31.458   5.463  1.00 30.00           N
ATOM   4275  CA  VAL C 343      12.624 -32.154   4.250  1.00 30.00           C
ATOM   4276  C   VAL C 343      11.434 -31.338   3.742  1.00 30.00           C
ATOM   4277  O   VAL C 343      10.506 -31.039   4.497  1.00 30.00           O
ATOM   4278  N   GLY C 344      11.439 -31.016   2.459  1.00 30.00           N
ATOM   4279  CA  GLY C 344      10.325 -30.222   1.971  1.00 30.00           C
ATOM   4280  C   GLY C 344      10.296 -30.228   0.469  1.00 30.00           C
ATOM   4281  O   GLY C 344      11.125 -30.834  -0.179  1.00 30.00           O
ATOM   4282  N   THR C 345       9.251 -29.571  -0.015  1.00 30.00           N
ATOM   4283  CA  THR C 345       9.129 -29.434  -1.457  1.00 30.00           C
ATOM   4284  C   THR C 345       8.286 -28.197  -1.761  1.00 30.00           C
ATOM   4285  O   THR C 345       7.345 -27.847  -1.056  1.00 30.00           O
ATOM   4286  N   THR C 346       8.669 -27.604  -2.880  1.00 30.00           N
ATOM   4287  CA  THR C 346       7.864 -26.520  -3.424  1.00 30.00           C
ATOM   4288  C   THR C 346       7.400 -26.992  -4.796  1.00 30.00           C
ATOM   4289  O   THR C 346       8.207 -27.595  -5.508  1.00 30.00           O
ATOM   4290  N   ILE C 347       6.159 -26.704  -5.127  1.00 30.00           N
ATOM   4291  CA  ILE C 347       5.666 -26.961  -6.468  1.00 30.00           C
ATOM   4292  C   ILE C 347       5.289 -25.614  -7.078  1.00 30.00           C
ATOM   4293  O   ILE C 347       4.392 -24.894  -6.631  1.00 30.00           O
ATOM   4294  N   VAL C 348       5.979 -25.313  -8.166  1.00 30.00           N
ATOM   4295  CA  VAL C 348       5.828 -24.081  -8.908  1.00 30.00           C
ATOM   4296  C   VAL C 348       4.896 -24.283 -10.089  1.00 30.00           C
ATOM   4297  O   VAL C 348       5.343 -24.863 -11.071  1.00 30.00           O
ATOM   4298  N   ASP C 349       3.664 -23.802  -9.994  1.00 30.00           N
ATOM   4299  CA  ASP C 349       2.752 -23.915 -11.124  1.00 30.00           C
ATOM   4300  C   ASP C 349       3.271 -23.043 -12.261  1.00 30.00           C
ATOM   4301  O   ASP C 349       3.135 -23.400 -13.415  1.00 30.00           O
ATOM   4302  N   ALA C 350       3.805 -21.880 -11.947  1.00 30.00           N
ATOM   4303  CA  ALA C 350       4.403 -20.922 -12.857  1.00 30.00           C
ATOM   4304  C   ALA C 350       5.127 -19.902 -11.971  1.00 30.00           C
ATOM   4305  O   ALA C 350       5.298 -20.147 -10.765  1.00 30.00           O
ATOM   4306  N   ASP C 351       5.422 -18.721 -12.461  1.00 30.00           N
ATOM   4307  CA  ASP C 351       6.139 -17.687 -11.726  1.00 30.00           C
ATOM   4308  C   ASP C 351       5.280 -16.954 -10.707  1.00 30.00           C
ATOM   4309  O   ASP C 351       5.768 -16.297  -9.798  1.00 30.00           O
ATOM   4310  N   LYS C 352       3.965 -17.072 -10.840  1.00 30.00           N
ATOM   4311  CA  LYS C 352       3.032 -16.399  -9.970  1.00 30.00           C
ATOM   4312  C   LYS C 352       2.418 -17.293  -8.910  1.00 30.00           C
ATOM   4313  O   LYS C 352       1.830 -16.773  -7.957  1.00 30.00           O
ATOM   4314  CB  LYS C 352       2.003 -15.652 -10.791  1.00 30.00           C
ATOM   4315  CG  LYS C 352       2.447 -14.306 -11.425  1.00110.00           C
ATOM   4316  CD  LYS C 352       3.938 -13.964 -11.471  1.00110.00           C
ATOM   4317  CE  LYS C 352       4.216 -12.664 -12.219  1.00110.00           C
ATOM   4318  NZ  LYS C 352       5.640 -12.313 -12.068  1.00110.00           N1+
ATOM   4319  N   TYR C 353       2.450 -18.607  -9.147  1.00 30.00           N
ATOM   4320  CA  TYR C 353       1.723 -19.462  -8.208  1.00 30.00           C
ATOM   4321  C   TYR C 353       2.577 -20.640  -7.772  1.00 30.00           C
ATOM   4322  O   TYR C 353       3.164 -21.333  -8.594  1.00 30.00           O
ATOM   4323  CB  TYR C 353       0.442 -20.020  -8.755  1.00 30.00           C
ATOM   4324  CG  TYR C 353      -0.566 -18.976  -8.412  1.00110.00           C
ATOM   4325  CD1 TYR C 353      -1.136 -18.917  -7.132  1.00110.00           C
ATOM   4326  CD2 TYR C 353      -0.844 -18.004  -9.361  1.00110.00           C
ATOM   4327  CE1 TYR C 353      -2.054 -17.923  -6.842  1.00110.00           C
ATOM   4328  CE2 TYR C 353      -1.788 -17.040  -9.083  1.00110.00           C
ATOM   4329  CZ  TYR C 353      -2.354 -16.989  -7.824  1.00110.00           C
ATOM   4330  OH  TYR C 353      -3.153 -15.932  -7.519  1.00110.00           O
ATOM   4331  N   ALA C 354       2.495 -20.913  -6.473  1.00 30.00           N
ATOM   4332  CA  ALA C 354       3.182 -22.098  -5.983  1.00 30.00           C
ATOM   4333  C   ALA C 354       2.502 -22.612  -4.728  1.00 30.00           C
ATOM   4334  O   ALA C 354       1.537 -22.048  -4.220  1.00 30.00           O
ATOM   4335  N   VAL C 355       2.922 -23.795  -4.310  1.00 30.00           N
ATOM   4336  CA  VAL C 355       2.452 -24.377  -3.061  1.00 30.00           C
ATOM   4337  C   VAL C 355       3.662 -25.117  -2.495  1.00 30.00           C
ATOM   4338  O   VAL C 355       4.491 -25.551  -3.293  1.00 30.00           O
ATOM   4339  N   THR C 356       3.730 -25.290  -1.183  1.00 30.00           N
ATOM   4340  CA  THR C 356       4.831 -25.986  -0.582  1.00 30.00           C
ATOM   4341  C   THR C 356       4.390 -26.671   0.714  1.00 30.00           C
ATOM   4342  O   THR C 356       3.347 -26.375   1.293  1.00 30.00           O
ATOM   4343  N   VAL C 357       5.236 -27.611   1.113  1.00 30.00           N
ATOM   4344  CA  VAL C 357       5.123 -28.312   2.374  1.00 30.00           C
ATOM   4345  C   VAL C 357       6.534 -28.246   2.955  1.00 30.00           C
ATOM   4346  O   VAL C 357       7.489 -28.501   2.231  1.00 30.00           O
ATOM   4347  N   GLU C 358       6.679 -27.823   4.190  1.00 30.00           N
ATOM   4348  CA  GLU C 358       8.011 -27.748   4.777  1.00 30.00           C
ATOM   4349  C   GLU C 358       7.955 -28.481   6.107  1.00 30.00           C
ATOM   4350  O   GLU C 358       7.096 -28.142   6.910  1.00 30.00           O
ATOM   4351  N   ALA C 359       8.832 -29.454   6.301  1.00 30.00           N
ATOM   4352  CA  ALA C 359       8.762 -30.259   7.520  1.00 30.00           C
ATOM   4353  C   ALA C 359      10.064 -30.231   8.300  1.00 30.00           C
ATOM   4354  O   ALA C 359      11.144 -30.551   7.786  1.00 30.00           O
ATOM   4355  N   ARG C 360       9.989 -29.863   9.566  1.00 30.00           N
ATOM   4356  CA  ARG C 360      11.099 -29.792  10.482  1.00 30.00           C
ATOM   4357  C   ARG C 360      11.098 -30.981  11.453  1.00 30.00           C
ATOM   4358  O   ARG C 360      10.209 -31.190  12.277  1.00 30.00           O
ATOM   4359  CB  ARG C 360      11.208 -28.391  11.129  1.00 30.00           C
ATOM   4360  CG  ARG C 360      10.270 -28.042  12.260  1.00110.00           C
ATOM   4361  CD  ARG C 360      10.355 -26.612  12.789  1.00110.00           C
ATOM   4362  NE  ARG C 360      11.686 -26.120  13.130  1.00110.00           N
ATOM   4363  CZ  ARG C 360      11.876 -24.984  13.845  1.00110.00           C
ATOM   4364  NH1 ARG C 360      10.855 -24.259  14.310  1.00110.00           N
ATOM   4365  NH2 ARG C 360      13.114 -24.561  14.109  1.00110.00           N1+
ATOM   4366  N   LEU C 361      12.092 -31.827  11.268  1.00 30.00           N
ATOM   4367  CA  LEU C 361      12.382 -32.975  12.132  1.00 30.00           C
ATOM   4368  C   LEU C 361      13.339 -32.427  13.176  1.00 30.00           C
ATOM   4369  O   LEU C 361      14.545 -32.394  13.002  1.00 30.00           O
ATOM   4370  N   ILE C 362      12.813 -31.887  14.268  1.00110.00           N
ATOM   4371  CA  ILE C 362      13.584 -31.261  15.328  1.00110.00           C
ATOM   4372  C   ILE C 362      12.934 -31.655  16.657  1.00110.00           C
ATOM   4373  O   ILE C 362      11.949 -32.417  16.711  1.00110.00           O
ATOM   4374  N   ASP C 363      13.477 -31.058  17.724  1.00110.00           N
ATOM   4375  CA  ASP C 363      13.131 -31.240  19.117  1.00110.00           C
ATOM   4376  C   ASP C 363      11.786 -30.641  19.247  1.00110.00           C
ATOM   4377  O   ASP C 363      11.031 -30.960  20.177  1.00110.00           O
ATOM   4378  N   GLU C 364      11.456 -29.768  18.274  1.00110.00           N
ATOM   4379  CA  GLU C 364      10.138 -29.208  18.027  1.00110.00           C
ATOM   4380  C   GLU C 364       9.706 -29.529  16.579  1.00110.00           C
ATOM   4381  O   GLU C 364      10.072 -28.806  15.652  1.00110.00           O
ATOM   4382  N   ARG C 365       8.958 -30.622  16.384  1.00110.00           N
ATOM   4383  CA  ARG C 365       8.464 -31.055  15.072  1.00110.00           C
ATOM   4384  C   ARG C 365       7.377 -30.104  14.569  1.00110.00           C
ATOM   4385  O   ARG C 365       6.317 -30.042  15.186  1.00110.00           O
ATOM   4386  CB  ARG C 365       7.906 -32.494  15.215  1.00110.00           C
ATOM   4387  CG  ARG C 365       7.638 -33.237  13.901  1.00110.00           C
ATOM   4388  CD  ARG C 365       6.311 -32.885  13.230  1.00110.00           C
ATOM   4389  NE  ARG C 365       6.046 -33.791  12.103  1.00110.00           N
ATOM   4390  CZ  ARG C 365       4.919 -33.793  11.371  1.00110.00           C
ATOM   4391  NH1 ARG C 365       3.933 -32.921  11.599  1.00110.00           N
ATOM   4392  NH2 ARG C 365       4.774 -34.681  10.385  1.00110.00           N1+
ATOM   4393  N   ALA C 366       7.550 -29.477  13.396  1.00 30.00           N
ATOM   4394  CA  ALA C 366       6.572 -28.567  12.819  1.00 30.00           C
ATOM   4395  C   ALA C 366       6.438 -28.866  11.329  1.00 30.00           C
ATOM   4396  O   ALA C 366       7.441 -29.099  10.663  1.00 30.00           O
ATOM   4397  N   ALA C 367       5.205 -28.857  10.839  1.00 30.00           N
ATOM   4398  CA  ALA C 367       4.962 -29.026   9.421  1.00 30.00           C
ATOM   4399  C   ALA C 367       4.230 -27.755   8.949  1.00 30.00           C
ATOM   4400  O   ALA C 367       3.215 -27.374   9.532  1.00 30.00           O
ATOM   4401  N   HIS C 368       4.741 -27.166   7.874  1.00 30.00           N
ATOM   4402  CA  HIS C 368       4.083 -25.971   7.336  1.00 30.00           C
ATOM   4403  C   HIS C 368       3.575 -26.296   5.944  1.00 30.00           C
ATOM   4404  O   HIS C 368       4.268 -27.012   5.211  1.00 30.00           O
ATOM   4405  CB  HIS C 368       5.067 -24.792   7.236  1.00 30.00           C
ATOM   4406  CG  HIS C 368       4.462 -23.496   6.801  1.00110.00           C
ATOM   4407  ND1 HIS C 368       3.647 -22.734   7.603  1.00110.00           N
ATOM   4408  CD2 HIS C 368       4.577 -22.775   5.631  1.00110.00           C
ATOM   4409  CE1 HIS C 368       3.328 -21.601   6.906  1.00110.00           C
ATOM   4410  NE2 HIS C 368       3.866 -21.601   5.707  1.00110.00           N
ATOM   4411  N   VAL C 369       2.384 -25.819   5.618  1.00 30.00           N
ATOM   4412  CA  VAL C 369       1.809 -26.006   4.291  1.00 30.00           C
ATOM   4413  C   VAL C 369       1.405 -24.629   3.767  1.00 30.00           C
ATOM   4414  O   VAL C 369       0.814 -23.844   4.503  1.00 30.00           O
ATOM   4415  N   ASN C 370       1.716 -24.307   2.511  1.00 30.00           N
ATOM   4416  CA  ASN C 370       1.496 -22.954   2.037  1.00 30.00           C
ATOM   4417  C   ASN C 370       1.009 -22.876   0.613  1.00 30.00           C
ATOM   4418  O   ASN C 370       1.459 -23.653  -0.221  1.00 30.00           O
ATOM   4419  N   ALA C 371       0.124 -21.918   0.346  1.00 30.00           N
ATOM   4420  CA  ALA C 371      -0.281 -21.637  -1.031  1.00 30.00           C
ATOM   4421  C   ALA C 371       0.009 -20.154  -1.256  1.00 30.00           C
ATOM   4422  O   ALA C 371      -0.311 -19.292  -0.447  1.00 30.00           O
ATOM   4423  N   GLN C 372       0.817 -19.896  -2.281  1.00 30.00           N
ATOM   4424  CA  GLN C 372       1.347 -18.586  -2.594  1.00 30.00           C
ATOM   4425  C   GLN C 372       0.934 -18.064  -3.964  1.00 30.00           C
ATOM   4426  O   GLN C 372       1.219 -18.664  -4.997  1.00 30.00           O
ATOM   4427  N   PHE C 373       0.310 -16.894  -3.981  1.00 30.00           N
ATOM   4428  CA  PHE C 373       0.097 -16.139  -5.208  1.00 30.00           C
ATOM   4429  C   PHE C 373       1.039 -14.925  -5.091  1.00 30.00           C
ATOM   4430  O   PHE C 373       1.145 -14.321  -4.020  1.00 30.00           O
ATOM   4431  CB  PHE C 373      -1.065 -15.175  -5.482  1.00 30.00           C
ATOM   4432  CG  PHE C 373      -0.965 -14.113  -6.642  1.00110.00           C
ATOM   4433  CD1 PHE C 373      -0.653 -14.439  -7.961  1.00110.00           C
ATOM   4434  CD2 PHE C 373      -1.104 -12.742  -6.398  1.00110.00           C
ATOM   4435  CE1 PHE C 373      -0.729 -13.518  -9.014  1.00110.00           C
ATOM   4436  CE2 PHE C 373      -1.158 -11.798  -7.428  1.00110.00           C
ATOM   4437  CZ  PHE C 373      -1.019 -12.194  -8.749  1.00110.00           C
ATOM   4438  N   ARG C 374       1.755 -14.614  -6.156  1.00 30.00           N
ATOM   4439  CA  ARG C 374       2.672 -13.482  -6.102  1.00 30.00           C
ATOM   4440  C   ARG C 374       2.698 -12.794  -7.463  1.00 30.00           C
ATOM   4441  O   ARG C 374       2.473 -13.439  -8.480  1.00 30.00           O
ATOM   4442  CB  ARG C 374       4.102 -13.935  -5.746  1.00 30.00           C
ATOM   4443  CG  ARG C 374       4.801 -14.827  -6.784  1.00110.00           C
ATOM   4444  CD  ARG C 374       6.230 -15.173  -6.358  1.00110.00           C
ATOM   4445  NE  ARG C 374       7.010 -15.689  -7.491  1.00110.00           N
ATOM   4446  CZ  ARG C 374       8.303 -16.046  -7.431  1.00110.00           C
ATOM   4447  NH1 ARG C 374       8.966 -16.072  -6.272  1.00110.00           N
ATOM   4448  NH2 ARG C 374       8.955 -16.383  -8.545  1.00110.00           N1+
ATOM   4449  N   PHE C 375       3.090 -11.523  -7.413  1.00 30.00           N
ATOM   4450  CA  PHE C 375       3.197 -10.745  -8.629  1.00 30.00           C
ATOM   4451  C   PHE C 375       4.382  -9.782  -8.525  1.00 30.00           C
ATOM   4452  O   PHE C 375       4.845  -9.469  -7.416  1.00 30.00           O
ATOM   4453  OXT PHE C 375       4.812  -9.231  -9.559  1.00 30.00           O1-
ATOM   4454  CB  PHE C 375       1.946  -9.918  -8.922  1.00 30.00           C
ATOM   4455  CG  PHE C 375       1.667  -8.832  -7.909  1.00 30.00           C
ATOM   4456  CD1 PHE C 375       1.120  -9.120  -6.653  1.00 30.00           C
ATOM   4457  CD2 PHE C 375       1.990  -7.510  -8.217  1.00 30.00           C
ATOM   4458  CE1 PHE C 375       0.877  -8.100  -5.735  1.00 30.00           C
ATOM   4459  CE2 PHE C 375       1.746  -6.494  -7.302  1.00 30.00           C
ATOM   4460  CZ  PHE C 375       1.198  -6.787  -6.062  1.00 30.00           C
ENDMDL
END   
